# Supplementary material for: Confounding factors in assessing the enriched expression of somatic mutant alleles in bulk tumor samples
Source: Genome Res. 2026 Apr;36(4):671–83. doi: 10.1101/gr.281003.125 (PMC13138019; doi:10.1101/gr.281003.125)
Supplement: Supplement 17 [file Supplemental_Table_S5.xlsx]

## Sheet: Sheet1
Supplemental Table S5
Somatic driver indels discovered by RNA-seq analysis (RNA-only)
CHROM	POS	REF	ALT	Gene	DriverAnnotation	Isoform	AAChange	VariantEffect	Tumor_WES_REF_CNT	Tumor_WES_ALT_CNT	Normal_WES_REF_CNT	Normal_WES_ALT_CNT	Tumor_RNA_REF_CNT	Tumor_RNA_ALT_CNT	CaseID	Tumor	Purity	IsUpwardAEV	DNA_VAF	RNA_VAF	AEV	Raw_p_Value	FDR	ActionabilityRank	Tumor_WGS_REF_CNT	Tumor_WGS_ALT_CNT	Normal_WGS_REF_CNT	Normal_WGS_ALT_CNT	ValidationComment		Note:
chr1	6186722	G	GT	RPL22	tumor_suppressor_gene	NM_000983.4	R113fs	frameshift	73	2	93	0	924	30	d45aee46-838e-44af-8422-46710b3240a8	LUAD	0.6	FALSE	0.0266667	0.0314465	1.17925	1	1	-1	-1	-1	-1	-1	WES_validated/WGS_unavailable		"-1" is given for missing values or analysis was not applicable
chr1	6197688	G	GTGGGTGCA	RPL22	tumor_suppressor_gene	NM_000983.4	H27fs	frameshift	18	16	33	0	663	302	b0770eff-dff2-4e10-8fc9-c07a81efcc5e	UCS	0.83	FALSE	0.470588	0.312953	0.665026	0.0612319	0.167124	-1	-1	-1	-1	-1	WES_validated/WGS_unavailable
chr1	6197724	CT	C	RPL22	tumor_suppressor_gene	NM_000983.4	K15fs	frameshift	12	4	39	0	757	224	1426b4bf-f4a5-477c-bbbb-e0e656549764	PRAD	0.75	FALSE	0.25	0.228338	0.913354	0.769627	0.919254	-1	-1	-1	-1	-1	WES_validated/WGS_unavailable
chr1	6197724	CT	C	RPL22	tumor_suppressor_gene	NM_000983.4	K15fs	frameshift	15	19	42	1	384	615	2b794eae-814c-4b5c-b276-be9096b94f94	THYM	0.63	FALSE	0.558824	0.615616	1.10163	0.591577	0.802854	-1	-1	-1	-1	-1	WES_validated/WGS_unavailable
chr1	6197724	CT	C	RPL22	tumor_suppressor_gene	NM_000983.4	K15fs	frameshift	33	21	106	4	606	206	8ad1c98b-5395-477e-87a8-19dff3a59c26	READ	0.83	FALSE	0.388889	0.253695	0.652357	0.036947	0.11315	-1	-1	-1	-1	-1	WES_validated/WGS_unavailable
chr1	6197724	CT	C	RPL22	tumor_suppressor_gene	NM_000983.4	K15fs	frameshift	40	10	61	5	834	84	a7b76662-8380-4f35-9307-99c0acacb904	PRAD	0.61	FALSE	0.2	0.0915033	0.457516	0.0228064	0.0777758	-1	4	0	5	0	WES_validated/WGS_failed_with_probablity_0.4096
chr1	6197724	CT	C	RPL22	tumor_suppressor_gene	NM_000983.4	K15fs	frameshift	11	7	17	1	744	255	abc753f0-5ae2-4bec-96b8-6a05d84bf1c1	LUSC	0.35	FALSE	0.388889	0.255255	0.656371	0.27336	0.493213	-1	-1	-1	-1	-1	WES_validated/WGS_unavailable
chr1	6197724	CT	C	RPL22	tumor_suppressor_gene	NM_000983.4	K15fs	frameshift	17	14	33	0	631	368	b0770eff-dff2-4e10-8fc9-c07a81efcc5e	UCS	0.83	FALSE	0.451613	0.368368	0.815673	0.350747	0.583117	-1	-1	-1	-1	-1	WES_validated/WGS_unavailable
chr1	6197724	CT	C	RPL22	tumor_suppressor_gene	NM_000983.4	K15fs	frameshift	29	6	35	0	781	178	c0f88fc5-56b0-4255-bbd1-9a21ced8b37b	BRCA	0.3	FALSE	0.171429	0.18561	1.08273	1	1	-1	93	21	46	0	WES_validated/WGS_validated
chr1	11157247	A	ATCCTCCCAC	MTOR	oncogene	NM_004958.4	E1455_E1457dup	proteinIns	101	20	109	0	19	6	59f49821-412c-4945-b9e2-be0dcc8bf8bf	KIRC	0.47	FALSE	0.165289	0.24	1.452	0.393402	0.628229	3	72	12	37	0	WES_validated/WGS_validated
chr1	16135121	TG	T	EPHA2	tumor_suppressor_gene	NM_004431.5	P499fs	frameshift	223	2	335	0	126	9	abc753f0-5ae2-4bec-96b8-6a05d84bf1c1	LUSC	0.35	FALSE	0.00888889	0.0666667	7.5	0.00311649	0.0140847	-1	-1	-1	-1	-1	WES_validated/WGS_unavailable
chr1	16138298	TCCTGAGGTGCCCGGAAGAA	C	EPHA2	tumor_suppressor_gene	NM_004431.5	F313_D319fs	frameshift	24	2	18	0	91	8	972476b7-d7f3-4865-b978-0c13f29457cb	LUSC	0.18	FALSE	0.0769231	0.0808081	1.05051	1	1	-1	-1	-1	-1	-1	WES_validated/WGS_unavailable
chr1	26696958	GA	T	ARID1A	tumor_suppressor_gene	NM_006015.6	Q185_S186fs	frameshift	14	8	8	0	26	12	e7a3574b-1fcf-4366-adf8-f4330d9be6f8	STAD	0.26	FALSE	0.363636	0.315789	0.868421	0.779694	0.924707	-1	75	12	59	0	WES_validated/WGS_validated
chr1	26697135	GGCGGCTGCCGGCT	AGC	ARID1A	tumor_suppressor_gene	NM_006015.6	A244_S249fs	frameshift	0	6	6	0	0	2	854e5236-f2d6-4681-be62-0bead955c926	BLCA	-1	FALSE	1	1	1	1	1	-1	6	72	50	0	WES_validated/WGS_validated
chr1	26697277	AC	A	ARID1A	tumor_suppressor_gene	NM_006015.6	T292fs	frameshift	5	1	4	0	94	18	2e04b48c-0805-4965-8afa-c5fcd32993c5	STAD	0.35	FALSE	0.166667	0.160714	0.964286	1	1	-1	65	13	27	0	WES_validated/WGS_validated
chr1	26697510	CG	C	ARID1A	tumor_suppressor_gene	NM_006015.6	G370fs	frameshift	0	1	1	0	10	5	aa2c5d29-2764-4804-9181-5870c0956904	STAD	0.81	FALSE	1	0.333333	0.333333	0.375	0.611427	-1	56	33	33	0	WES_validated/WGS_validated
chr1	26731547	CCA	C	ARID1A	tumor_suppressor_gene	NM_006015.6	Q583fs	frameshift	204	20	357	0	29	4	5b199e7e-cc23-4065-88ad-fdfe3d0683d6	LGG	0.83	FALSE	0.0892857	0.121212	1.35758	0.525404	0.754863	-1	-1	-1	-1	-1	WES_validated/WGS_unavailable
chr1	26731569	ACTGC	A	ARID1A	tumor_suppressor_gene	NM_006015.6	T590_A591fs	frameshift	206	21	206	0	59	24	1b641270-18f8-4257-821b-d26179e08e28	STAD	0.28	TRUE	0.092511	0.289157	3.12565	4.05e-05	0.000352757	-1	64	11	41	0	WES_validated/WGS_validated
chr1	26761385	C	CA	ARID1A	tumor_suppressor_gene	NM_006015.6	N722fs	frameshift	30	2	19	0	79	14	41b3dd5a-6413-40f5-9721-78cb218567b7	ESCA	0.23	FALSE	0.0625	0.150538	2.4086	0.356056	0.589837	-1	98	5	30	0	WES_validated/WGS_validated
chr1	26763033	GCATGGCTGGAGGCATAAACC	G	ARID1A	tumor_suppressor_gene	NM_006015.6	G827_P834fs	frameshift	25	5	40	0	46	5	8a575e00-5dc5-416d-a8f5-2cdfb8e62c31	KIRC	0.5	FALSE	0.166667	0.0980392	0.588235	0.48701	0.719107	-1	-1	-1	-1	-1	WES_validated/WGS_unavailable
chr1	26763101	TAT	AA	ARID1A	tumor_suppressor_gene	NM_006015.6	Y850fs	frameshift	23	3	23	0	109	24	97394c78-2815-4348-b4c9-df0b3b3d6b5e	ESCA	0.42	FALSE	0.115385	0.180451	1.56391	0.572214	0.793936	-1	-1	-1	-1	-1	WES_validated/WGS_unavailable
chr1	26771201	AG	A	ARID1A	tumor_suppressor_gene	NM_006015.6	K1094fs	frameshift	13	42	58	2	28	19	b162b3bf-8097-4466-b08f-6434f541038f	LUSC	0.7	FALSE	0.763636	0.404255	0.529382	0.000273956	0.00170035	-1	-1	-1	-1	-1	WES_validated/WGS_unavailable
chr1	26773839	AC	A	ARID1A	tumor_suppressor_gene	NM_006015.6	T1348fs	frameshift	114	40	159	0	225	113	e181474c-1585-4aed-ba90-bae5324569d5	STAD	0.58	FALSE	0.25974	0.33432	1.28713	0.115075	0.270885	-1	63	37	39	0	WES_validated/WGS_validated
chr1	26773862	CA	T	ARID1A	tumor_suppressor_gene	NM_006015.6	P1355_S1356fs	frameshift	24	132	219	0	11	112	38007506-4865-41d4-83a9-1aa13648f459	LUSC	0.94	FALSE	0.846154	0.910569	1.07613	0.144663	0.313212	-1	6	55	53	0	WES_validated/WGS_validated
chr1	26774417	AG	A	ARID1A	tumor_suppressor_gene	NM_006015.6	Q1397fs	frameshift	21	17	29	1	5	6	f42868c0-ff59-438b-90a7-489aea678de9	UCEC	0.82	FALSE	0.447368	0.545455	1.21925	0.734108	0.899813	-1	57	41	30	0	WES_validated/WGS_validated
chr1	26774651	AC	A	ARID1A	tumor_suppressor_gene	NM_006015.6	N1475fs	frameshift	93	6	112	0	64	3	c91a4cc3-aaa9-4bc9-b157-e46551d334c8	KIRC	0.58	FALSE	0.0606061	0.0447761	0.738806	0.740838	0.904618	-1	-1	-1	-1	-1	WES_validated/WGS_unavailable
chr1	26775119	AGCCCCCCA	GGCCCCCG	ARID1A	tumor_suppressor_gene	NM_006015.6	Q1631_M1634fs	frameshift	16	1	18	0	106	9	f89588e9-ca73-4465-a7fb-7246edb45e3a	BRCA	0.38	FALSE	0.0588235	0.0782609	1.33043	1	1	-1	83	14	37	0	WES_validated/WGS_validated
chr1	26775209	TGA	T	ARID1A	tumor_suppressor_gene	NM_006015.6	M1661_K1662fs	frameshift	7	2	2	0	15	17	a45a2343-f425-4e62-9049-7782733b6234	UCEC	0.72	FALSE	0.222222	0.53125	2.39062	0.140236	0.307925	-1	65	38	46	0	WES_validated/WGS_validated
chr1	26779194	GA	G	ARID1A	tumor_suppressor_gene	NM_006015.6	E1766fs	frameshift	30	2	36	0	23	7	3bce9803-e74c-462e-bd40-8ec337a66f3a	UCEC	0.34	FALSE	0.0625	0.233333	3.73333	0.0766494	0.199331	-1	105	10	49	0	WES_validated/WGS_validated
chr1	26779255	AG	A	ARID1A	tumor_suppressor_gene	NM_006015.6	E1786fs	frameshift	32	1	53	0	61	3	3c6dc0eb-e94b-4293-b665-f3cba04fc8de	LGG	0.76	FALSE	0.030303	0.046875	1.54688	1	1	-1	74	0	36	0	WES_validated/WGS_failed_with_probability_0.102580983
chr1	26779404	G	GA	ARID1A	tumor_suppressor_gene	NM_006015.6	E1836fs	frameshift	86	4	131	0	76	37	5f53ace3-14ca-412a-af6c-98d8996f8177	KIRC	0.5	TRUE	0.0444444	0.327434	7.36726	3.09e-07	4.23e-06	-1	-1	-1	-1	-1	WES_validated/WGS_unavailable
chr1	26779436	T	TG	ARID1A	tumor_suppressor_gene	NM_006015.6	G1848fs	frameshift	105	8	164	0	274	21	30425882-20d7-47ed-9630-60977ba62c72	STAD	0.6	FALSE	0.0707965	0.0711864	1.00551	1	1	-1	89	6	29	0	WES_validated/WGS_validated
chr1	26779439	T	TG	ARID1A	tumor_suppressor_gene	NM_006015.6	D1850fs	frameshift	529	21	122	0	92	16	6c0ea771-ea86-4db6-994a-2372b2b8f536	PAAD	1	TRUE	0.0381818	0.148148	3.88007	6.19e-05	0.000488625	-1	100	1	38	0	WES_validated/WGS_validated
chr1	26779439	TG	T	ARID1A	tumor_suppressor_gene	NM_006015.6	G1848fs	frameshift	39	17	58	0	57	41	027b2a29-2fad-4ca8-a7cd-eb913d0205f8	UCEC	0.78	FALSE	0.303571	0.418367	1.37815	0.170871	0.353514	-1	71	46	54	0	WES_validated/WGS_validated
chr1	26779439	T	TG	ARID1A	tumor_suppressor_gene	NM_006015.6	D1850fs	frameshift	93	31	131	0	76	34	028632ed-d75a-49bb-b579-41962ba502fe	STAD	0.62	FALSE	0.25	0.309091	1.23636	0.380465	0.614952	-1	-1	-1	-1	-1	WES_validated/WGS_unavailable
chr1	26779439	TG	T	ARID1A	tumor_suppressor_gene	NM_006015.6	G1848fs	frameshift	87	37	130	2	136	195	08c73b36-ede5-4136-b73b-0e964d432f89	STAD	0.63	TRUE	0.298387	0.589124	1.97436	3.26e-08	5.33e-07	-1	-1	-1	-1	-1	WES_validated/WGS_unavailable
chr1	26779439	TG	T	ARID1A	tumor_suppressor_gene	NM_006015.6	G1848fs	frameshift	102	20	151	1	29	31	0f00ad32-e4be-49d4-a02a-d233bfc913c5	STAD	0.47	TRUE	0.163934	0.516667	3.15167	1.34e-06	1.53e-05	-1	-1	-1	-1	-1	WES_validated/WGS_unavailable
chr1	26779439	TG	T	ARID1A	tumor_suppressor_gene	NM_006015.6	G1848fs	frameshift	74	19	170	2	213	76	1d3a03a5-b757-4617-b65a-50f429a0e026	STAD	0.37	FALSE	0.204301	0.262976	1.2872	0.273287	0.493213	-1	79	19	37	0	WES_validated/WGS_validated
chr1	26779439	TG	T	ARID1A	tumor_suppressor_gene	NM_006015.6	G1848fs	frameshift	7	13	27	1	4	7	2a19051e-3ad1-444a-9d02-f895c26ac02c	UCEC	0.92	FALSE	0.65	0.636364	0.979021	1	1	-1	45	45	42	0	WES_validated/WGS_validated
chr1	26779439	T	TG	ARID1A	tumor_suppressor_gene	NM_006015.6	D1850fs	frameshift	52	150	173	7	3	56	43714e9a-e9c4-4206-af92-1d00d2a8ae35	UCEC	0.89	TRUE	0.742574	0.949153	1.27819	0.000250873	0.00157813	-1	2	9	34	0	WES_validated/WGS_validated
chr1	26779439	TG	T	ARID1A	tumor_suppressor_gene	NM_006015.6	G1848fs	frameshift	122	24	103	2	121	84	43e3fbf3-7812-45fb-bf4c-ce22a2aa1eee	STAD	0.95	TRUE	0.164384	0.409756	2.49268	6.88e-07	8.55e-06	-1	74	25	48	0	WES_validated/WGS_validated
chr1	26779439	T	TG	ARID1A	tumor_suppressor_gene	NM_006015.6	D1850fs	frameshift	54	36	116	5	8	5	633e6994-3e8b-4c0b-9b79-06cf4ab6f9bc	UCEC	0.75	FALSE	0.4	0.384615	0.961538	1	1	-1	-1	-1	-1	-1	WES_validated/WGS_unavailable
chr1	26779439	T	TG	ARID1A	tumor_suppressor_gene	NM_006015.6	D1850fs	frameshift	99	77	173	8	75	82	81e7a3d3-be70-4834-8018-4d2cc077a4e6	BRCA	0.85	FALSE	0.4375	0.522293	1.19381	0.125761	0.286267	-1	-1	-1	-1	-1	WES_validated/WGS_unavailable
chr1	26779439	TG	T	ARID1A	tumor_suppressor_gene	NM_006015.6	G1848fs	frameshift	116	8	155	0	73	12	84d2d341-9e52-49ab-8c51-417208834c5d	STAD	0.57	FALSE	0.0645161	0.141176	2.18824	0.0921957	0.227677	-1	-1	-1	-1	-1	WES_validated/WGS_unavailable
chr1	26779439	T	TG	ARID1A	tumor_suppressor_gene	NM_006015.6	D1850fs	frameshift	31	112	150	7	23	244	96457ebf-ae88-41f4-97e5-cdc3163418aa	BRCA	0.87	FALSE	0.783217	0.913858	1.1668	0.000349355	0.00211201	-1	-1	-1	-1	-1	WES_validated/WGS_unavailable
chr1	26779439	T	TG	ARID1A	tumor_suppressor_gene	NM_006015.6	D1850fs	frameshift	121	23	280	10	35	27	b045f24b-f822-4df9-9ffa-47308edcec8c	UCEC	0.66	TRUE	0.159722	0.435484	2.72651	6.7e-05	0.000517363	-1	54	29	43	0	WES_validated/WGS_validated
chr1	26779439	TG	T	ARID1A	tumor_suppressor_gene	NM_006015.6	G1848fs	frameshift	117	9	110	0	34	30	e617b5c5-55ca-47a7-8497-854ab2844818	STAD	0.38	TRUE	0.0714286	0.46875	6.5625	5.29e-10	1.09e-08	-1	62	19	28	0	WES_validated/WGS_validated
chr1	26779443	GG	T	ARID1A	tumor_suppressor_gene	NM_006015.6	G1849fs	frameshift	30	10	57	0	45	13	5202458b-c38a-47c0-a0ba-5f1a59a762a0	LUAD	0.28	FALSE	0.25	0.224138	0.896552	0.811304	0.943588	-1	-1	-1	-1	-1	WES_validated/WGS_unavailable
chr1	26779573	CAG	C	ARID1A	tumor_suppressor_gene	NM_006015.6	T1892_D1893fs	frameshift	64	3	99	0	145	11	c40ab957-fe46-43b1-992d-b4e2040a3f57	LGG	-1	FALSE	0.0447761	0.0705128	1.57479	0.561489	0.783727	-1	47	2	30	0	WES_validated/WGS_validated
chr1	26779633	ATGACATGTTG	CTGACA	ARID1A	tumor_suppressor_gene	NM_006015.6	D1912_L1915fs	frameshift	54	46	148	0	116	313	621411ee-c1f2-4da4-b1c0-cbe0936060f6	STAD	0.62	TRUE	0.46	0.729604	1.5861	7.04e-07	8.62e-06	-1	37	46	38	0	WES_validated/WGS_validated
chr1	26779677	G	GCT	ARID1A	tumor_suppressor_gene	NM_006015.6	A1927fs	frameshift	72	21	109	0	15	18	c8d672ed-9910-4f80-b222-38c833f55850	UCEC	0.4	TRUE	0.225806	0.545455	2.41558	0.0010121	0.00529096	-1	78	17	37	0	WES_validated/WGS_validated
chr1	26779684	GT	G	ARID1A	tumor_suppressor_gene	NM_006015.6	S1929fs	frameshift	86	10	102	0	12	16	4b0e544c-4090-4ebb-b3e5-2623aa91356c	LIHC	0.5	TRUE	0.104167	0.571429	5.48571	9.41e-07	1.12e-05	-1	-1	-1	-1	-1	WES_validated/WGS_unavailable
chr1	26779942	TCCTGCTGCACCACAAGCAC	T	ARID1A	tumor_suppressor_gene	NM_006015.6	I2015_H2021fs	frameshift	93	4	90	0	292	47	b2e2d35c-7a79-4165-97a5-82d5c37d94f2	STAD	0.28	FALSE	0.0412371	0.138643	3.36209	0.00676637	0.0273891	-1	77	7	38	0	WES_validated/WGS_validated
chr1	26779964	AGAACG	CGAAC	ARID1A	tumor_suppressor_gene	NM_006015.6	P2022_R2024fs	frameshift	87	33	145	0	108	20	d30f460b-8e85-4eb4-83b8-0a5d8bf4d10d	KIRC	-1	FALSE	0.275	0.15625	0.568182	0.0295889	0.0952355	-1	-1	-1	-1	-1	WES_validated/WGS_unavailable
chr1	26779979	AC	A	ARID1A	tumor_suppressor_gene	NM_006015.6	P2028fs	frameshift	19	2	25	0	58	39	a28beb70-d309-45b8-a2ba-40558f3c8f4f	UCEC	0.67	FALSE	0.0952381	0.402062	4.22165	0.0100036	0.0377057	-1	43	35	39	0	WES_validated/WGS_validated
chr1	26779989	T	TA	ARID1A	tumor_suppressor_gene	NM_006015.6	Y2031fs	frameshift	112	9	111	0	75	13	e828455d-4680-41b2-8a1c-1582e3790d62	BRCA	-1	FALSE	0.0743802	0.147727	1.98611	0.110659	0.264843	-1	75	3	44	0	WES_validated/WGS_validated
chr1	26780019	G	GT	ARID1A	tumor_suppressor_gene	NM_006015.6	V2041fs	frameshift	30	1	27	0	84	32	a45d296e-efc0-479e-b2f6-bad834668cdf	BRCA	1	FALSE	0.0322581	0.275862	8.55172	0.00291429	0.0132352	-1	70	14	33	0	WES_validated/WGS_validated
chr1	26780193	G	GCCCAGGAC	ARID1A	tumor_suppressor_gene	NM_006015.6	A2099fs	frameshift	19	4	26	0	136	39	bac4b268-c781-4408-96d8-43a48fec7418	BRCA	0.34	FALSE	0.173913	0.222857	1.28143	0.789282	0.933901	-1	73	13	38	0	WES_validated/WGS_validated
chr1	26780603	CCG	C	ARID1A	tumor_suppressor_gene	NM_006015.6	R2236fs	frameshift	176	13	83	0	64	29	2cd8ea73-cb3f-4b17-9b97-fa12eb03b85b	LUAD	-1	TRUE	0.0687831	0.311828	4.5335	2.26e-07	3.28e-06	-1	46	4	55	0	WES_validated/WGS_validated
chr1	26780644	C	CA	ARID1A	tumor_suppressor_gene	NM_006015.6	S2249fs	frameshift	2	5	27	0	5	117	5fc7ff35-d3f7-4687-8759-3542bd58e988	BRCA	0.94	FALSE	0.714286	0.959016	1.34262	0.0467332	0.136391	-1	11	39	41	0	WES_validated/WGS_validated
chr1	26780721	A	ATT	ARID1A	tumor_suppressor_gene	NM_006015.6	I2275fs	frameshift	452	40	89	0	41	18	4f87e061-e773-48f2-84ba-32401396500e	PAAD	0.96	TRUE	0.0813008	0.305085	3.75254	4.96e-06	5.3e-05	-1	75	11	39	0	WES_validated/WGS_validated
chr1	36291424	A	AT	THRAP3	tumor_suppressor_gene	NM_005119.4	H599fs	frameshift	57	4	62	0	131	7	aa10d6da-ba20-43e8-ab8f-a9b4b58738b4	HNSC	0.3	FALSE	0.0655738	0.0507246	0.773551	0.739441	0.904618	-1	93	15	37	0	WES_validated/WGS_validated
chr1	50974125	TC	T	CDKN2C	tumor_suppressor_gene	NM_001262.2	F121fs	frameshift	94	1	58	0	242	10	de9315b3-b3df-45f0-adc2-69aa6b8ff717	THCA	0.86	FALSE	0.0105263	0.0396825	3.76984	0.301087	0.526903	-1	101	2	48	0	WES_validated/WGS_validated
chr1	92833636	GACAA	G	RPL5	tumor_suppressor_gene	NM_000969.5	T56_N57fs	frameshift	42	20	76	0	922	22	739cb132-51e9-41be-8064-311a13da0d74	BRCA	0.84	FALSE	0.322581	0.0233051	0.0722458	4.92e-15	1.7e-13	-1	68	51	42	0	WES_validated/WGS_validated
chr1	145994558	C	CA	TXNIP	tumor_suppressor_gene	NM_006472.6	E273fs	frameshift	165	19	96	0	913	86	9aa6522a-120a-4691-993e-3f8534f644b5	BLCA	0.58	FALSE	0.103261	0.0860861	0.833676	0.480024	0.714638	-1	101	10	37	0	WES_validated/WGS_validated
chr1	202011291	A	AG	ELF3	tumor_suppressor_gene	NM_004433.5	E52fs	frameshift	106	9	115	0	816	54	b11234b9-93d5-46df-bb67-110d6ed3e664	KIRP	-1	FALSE	0.0782609	0.062069	0.793103	0.540929	0.768862	-1	67	6	44	0	WES_validated/WGS_validated
chr1	202012067	TTCTCAC	GA	ELF3	tumor_suppressor_gene	NM_004433.5	F92_R94fs	frameshift	71	34	111	0	570	429	5b39a0dc-8ab2-46c6-95c7-65df919ebc76	BLCA	0.51	FALSE	0.32381	0.429429	1.32618	0.0379648	0.114883	-1	56	34	48	0	WES_validated/WGS_validated
chr1	202012353	CTTCTGATGAGCTCAGTTGGAT	GAG	ELF3	tumor_suppressor_gene	NM_004433.5	S132_I139fs	frameshift	87	5	92	0	938	58	692a6ced-0246-4e5e-ad2f-20450073f335	BLCA	0.22	FALSE	0.0543478	0.0582329	1.07149	1	1	-1	107	10	49	0	WES_validated/WGS_validated
chr1	202012354	TTC	T	ELF3	tumor_suppressor_gene	NM_004433.5	S133fs	frameshift	94	6	101	0	943	39	31da07bb-6752-49a3-a7ea-5427c04a9458	BLCA	0.24	FALSE	0.06	0.0397149	0.661914	0.296961	0.521642	-1	140	5	42	0	WES_validated/WGS_validated
chr1	202013255	CA	C	ELF3	tumor_suppressor_gene	NM_004433.5	K255fs	frameshift	98	4	153	0	975	24	3f0a0748-9acc-4d0b-ba18-7c08bd183f86	BLCA	0.5	FALSE	0.0392157	0.024024	0.612613	0.320062	0.550791	-1	1	2	51	0	WES_validated/WGS_validated
chr1	202013838	G	GC	ELF3	tumor_suppressor_gene	NM_004433.5	G272fs	frameshift	16	2	17	0	720	279	dc321b92-7275-48c9-adeb-7670db3195ef	BLCA	0.46	FALSE	0.111111	0.279279	2.51351	0.180554	0.365572	-1	89	20	45	0	WES_validated/WGS_validated
chr1	202013839	CACCCACCTGTGGGAGTTCATCCGGGACATCCTCAT	C	ELF3	tumor_suppressor_gene	NM_004433.5	T273_I284fs	frameshift	7	11	16	0	548	451	573e124f-98cb-4014-b9d2-0499f7fbdb7a	BLCA	0.78	FALSE	0.611111	0.451451	0.738739	0.232836	0.440591	-1	68	69	55	0	WES_validated/WGS_validated
chr1	202013887	C	CAACG	ELF3	tumor_suppressor_gene	NM_004433.5	G291fs	frameshift	0	1	1	0	473	85	2a7903cc-345d-48f7-9fec-b4a5f09f8002	READ	0.83	FALSE	1	0.15233	0.15233	0.153846	0.326266	-1	48	27	38	0	WES_validated/WGS_validated
chr1	202013947	C	CG	ELF3	tumor_suppressor_gene	NM_004433.5	E309fs	frameshift	10	4	21	1	181	43	1426b4bf-f4a5-477c-bbbb-e0e656549764	PRAD	0.75	FALSE	0.285714	0.191964	0.671875	0.485531	0.719107	-1	-1	-1	-1	-1	WES_validated/WGS_unavailable
chr1	202015237	C	CGG	ELF3	tumor_suppressor_gene	NM_004433.5	R344fs	frameshift	32	17	55	4	493	483	4dc5cffe-ed8c-47ab-b5fc-f9615b5414f7	BLCA	0.72	FALSE	0.346939	0.494877	1.42641	0.0560245	0.15758	-1	-1	-1	-1	-1	WES_validated/WGS_unavailable
chr1	202015239	GGTGGATG	AGT	ELF3	tumor_suppressor_gene	NM_004433.5	R344_G347fs	frameshift	47	2	42	0	898	101	f93ccd2d-3c77-4bd3-8cac-5203bd57735f	CESC	0.77	FALSE	0.0408163	0.101101	2.47698	0.220345	0.424723	-1	90	5	30	0	WES_validated/WGS_validated
chr1	202015299	A	AG	ELF3	tumor_suppressor_gene	NM_004433.5	E365fs	frameshift	33	1	28	0	653	130	24d56331-4bca-4ab8-9fb7-a95a30b4c8fe	BLCA	-1	FALSE	0.0294118	0.166028	5.64496	0.030302	0.0959564	-1	145	5	37	0	WES_validated/WGS_validated
chr1	202015320	C	CTG	ELF3	tumor_suppressor_gene	NM_004433.5	*372fs	frameshift	43	4	44	0	713	286	5c4aebeb-fb6f-4d66-b24a-89ef20de971e	BLCA	0.29	TRUE	0.0851064	0.286286	3.36386	0.00139678	0.00691705	-1	-1	-1	-1	-1	WES_validated/WGS_unavailable
chr2	21002102	AACTTG	A	APOB	tumor_suppressor_gene	NM_000384.3	Q4439_V4440fs	frameshift	77	1	88	0	916	22	9a56d8a8-dadd-442e-bc09-732cd619aef7	LIHC	0.77	FALSE	0.0128205	0.0234542	1.82942	1	1	-1	80	0	31	0	WES_validated/WGS_failed_with_probability_0.356196619
chr2	21007748	TGAAAA	T	APOB	tumor_suppressor_gene	NM_000384.3	F3039_S3040fs	frameshift	66	35	129	0	385	73	01cc571c-a47c-4548-9c14-5e51c79b095b	LIHC	0.75	FALSE	0.346535	0.159389	0.45995	4.45e-05	0.000379725	-1	-1	-1	-1	-1	WES_validated/WGS_unavailable
chr2	21011072	CA	C	APOB	tumor_suppressor_gene	NM_000384.3	L1932fs	frameshift	129	11	132	0	643	196	a6a3f07c-ced4-451b-b2e5-c93e4ed622c1	LIHC	0.2	TRUE	0.0785714	0.233611	2.97324	9.86e-06	9.76e-05	-1	101	9	40	0	WES_validated/WGS_validated
chr2	25234341	A	AT	DNMT3A	tumor_suppressor_gene	NM_175629.2	W893fs	frameshift	35	2	35	0	120	6	154c7698-c0fe-40da-b0fc-47b6385fcee1	THYM	-1	FALSE	0.0540541	0.047619	0.880952	1	1	-1	81	3	40	1	WES_validated/WGS_validated
chr2	25244159	TC	T	DNMT3A	tumor_suppressor_gene	NM_175629.2	E616fs	frameshift	56	41	43	4	13	8	7994d0a6-cef5-4391-a121-5a0853a34fa7	LAML	-1	FALSE	0.42268	0.380952	0.901278	0.810004	0.943588	-1	-1	-1	-1	-1	WES_validated/WGS_unavailable
chr2	43224385	C	CTCTG	ZFP36L2	tumor_suppressor_gene	NM_006887.5	E473fs	frameshift	2	2	4	0	291	127	c5b20ccc-523d-491c-8536-008e05c57212	BLCA	0.43	FALSE	0.5	0.303828	0.607656	0.589101	0.802854	-1	87	49	57	0	WES_validated/WGS_validated
chr2	43224662	TG	T	ZFP36L2	tumor_suppressor_gene	NM_006887.5	H381fs	frameshift	6	3	11	0	59	27	d8bfcc67-f5c3-42cd-9fc4-bd483f896da1	READ	0.79	FALSE	0.333333	0.313953	0.94186	1	1	-1	60	30	87	0	WES_validated/WGS_validated
chr2	43224760	GGCCCCCGGCGCCAGCAGGTCCTCGGC	G	ZFP36L2	tumor_suppressor_gene	NM_006887.5	A340_A348fs	frameshift	4	15	16	0	0	15	1136dd50-242a-4659-aad4-c53f9e759bb3	COAD	0.68	FALSE	0.789474	1	1.26667	0.113011	0.269088	-1	-1	-1	-1	-1	WES_validated/WGS_unavailable
chr2	43225087	G	GC	ZFP36L2	tumor_suppressor_gene	NM_006887.5	R239fs	frameshift	18	1	9	0	115	14	bed1fb3c-4459-460e-8190-29211857fa73	THCA	0.72	FALSE	0.0526316	0.108527	2.06202	0.693704	0.876555	-1	127	3	61	0	WES_validated/WGS_validated
chr2	43225094	C	CCA	ZFP36L2	tumor_suppressor_gene	NM_006887.5	G237fs	frameshift	12	6	28	0	16	19	220d75ae-c94b-473a-a988-ac40c15fa219	HNSC	0.64	FALSE	0.333333	0.542857	1.62857	0.244996	0.452562	-1	-1	-1	-1	-1	WES_validated/WGS_unavailable
chr2	43225105	C	CA	ZFP36L2	tumor_suppressor_gene	NM_006887.5	L233fs	frameshift	7	10	0	0	17	156	b26143d3-d458-4d5c-8446-fd2f05707352	READ	0.45	TRUE	0.588235	0.901734	1.53295	0.00179378	0.00869794	-1	33	57	38	0	WES_validated/WGS_validated
chr2	43225198	GGTATGAAAGGTGCGGCACAGCTCGGTCTT	G	ZFP36L2	tumor_suppressor_gene	NM_006887.5	K193_T202fs	frameshift	10	1	22	0	538	171	a91f7a8c-e0fe-403a-9ef0-f7679b2761cc	READ	0.79	FALSE	0.0909091	0.241185	2.65303	0.474335	0.709977	-1	4	0	1	0	WES_validated/WGS_failed_with_probability_0.683013455
chr2	43225203	G	GA	ZFP36L2	tumor_suppressor_gene	NM_006887.5	H201fs	frameshift	10	6	27	0	231	124	d5619045-060a-4b60-86e4-6a5774994fd4	COAD	0.55	FALSE	0.375	0.349296	0.931455	0.795689	0.935337	-1	-1	-1	-1	-1	WES_validated/WGS_unavailable
chr2	43225309	GCTCTCCTCGAAGGGCCGGCACAGCTCGGT	G	ZFP36L2	tumor_suppressor_gene	NM_006887.5	T156_S165fs	frameshift	47	2	50	0	152	78	7cb42865-af55-487d-b604-faace62bba51	HNSC	0.51	TRUE	0.0408163	0.33913	8.3087	6.71e-06	6.94e-05	-1	100	40	66	0	WES_validated/WGS_validated
chr2	43225325	C	CG	ZFP36L2	tumor_suppressor_gene	NM_006887.5	R160fs	frameshift	4	2	9	0	462	424	96457ebf-ae88-41f4-97e5-cdc3163418aa	BRCA	0.87	FALSE	0.333333	0.478555	1.43567	0.688341	0.874277	-1	25	16	32	0	WES_validated/WGS_validated
chr2	43225479	CGCCG	TGCCGC	ZFP36L2	tumor_suppressor_gene	NM_006887.5	G107_G109fs	frameshift	7	6	16	0	9	42	633ddc04-c424-42c8-8e54-673968b130a7	SKCM	0.4	FALSE	0.461538	0.823529	1.78431	0.0125443	0.0459794	-1	37	65	56	0	WES_validated/WGS_validated
chr2	43225479	CGCCGCCCCCCGACG	C	ZFP36L2	tumor_suppressor_gene	NM_006887.5	P104_G108fs	frameshift	14	2	12	0	46	4	edc290bf-9731-4f03-bc37-64542e78e8bb	BLCA	0.86	FALSE	0.125	0.08	0.64	0.626892	0.833766	-1	100	30	56	0	WES_validated/WGS_validated
chr2	43225483	GC	G	ZFP36L2	tumor_suppressor_gene	NM_006887.5	G107fs	frameshift	11	6	5	0	5	43	1fd75c4d-e74c-410c-a150-814722c6c1cc	COAD	-1	TRUE	0.352941	0.895833	2.53819	3.46e-05	0.000309945	-1	58	43	0	0	WES_validated/WGS_validated
chr2	43225483	G	GC	ZFP36L2	tumor_suppressor_gene	NM_006887.5	G107fs	frameshift	37	12	54	0	99	78	93690a96-421c-4c59-85ba-fa6dd538c721	COAD	0.61	FALSE	0.244898	0.440678	1.79944	0.0137493	0.0500022	-1	-1	-1	-1	-1	WES_validated/WGS_unavailable
chr2	43225483	GC	G	ZFP36L2	tumor_suppressor_gene	NM_006887.5	G107fs	frameshift	62	47	83	0	92	79	b08b5f49-9434-4653-9772-097ec29b2ca3	COAD	0.76	FALSE	0.431193	0.461988	1.07142	0.624528	0.831996	-1	61	27	36	0	WES_validated/WGS_validated
chr2	43225483	GC	G	ZFP36L2	tumor_suppressor_gene	NM_006887.5	G107fs	frameshift	9	31	32	0	55	485	eed7405f-f8f3-41a4-a0e7-242f23087f59	COAD	0.77	FALSE	0.775	0.898148	1.1589	0.0309347	0.0972718	-1	-1	-1	-1	-1	WES_validated/WGS_unavailable
chr2	43225500	TA	T	ZFP36L2	tumor_suppressor_gene	NM_006887.5	L101fs	frameshift	20	5	17	0	89	73	d5619045-060a-4b60-86e4-6a5774994fd4	COAD	0.55	FALSE	0.2	0.450617	2.25309	0.0276871	0.0910837	-1	76	36	31	0	WES_validated/WGS_validated
chr2	43225501	AAGGGTGCCGT	A	ZFP36L2	tumor_suppressor_gene	NM_006887.5	Y98_L101fs	frameshift	10	5	18	0	99	40	7a70f061-9a6f-408e-a416-7f5295ceba3b	COAD	0.67	FALSE	0.333333	0.28777	0.863309	0.767337	0.919254	-1	-1	-1	-1	-1	WES_validated/WGS_unavailable
chr2	43225507	G	GC	ZFP36L2	tumor_suppressor_gene	NM_006887.5	G99fs	frameshift	8	4	18	0	13	5	084ac674-f4cf-4a4a-a6a2-687c05c272ea	PRAD	0.57	FALSE	0.333333	0.277778	0.833333	1	1	-1	-1	-1	-1	-1	WES_validated/WGS_unavailable
chr2	43225511	TAG	T	ZFP36L2	tumor_suppressor_gene	NM_006887.5	S97_Y98fs	frameshift	23	2	21	0	86	62	d8e9ea52-ff28-4626-baa3-71350fd53ddf	COAD	0.44	TRUE	0.08	0.418919	5.23649	0.000695738	0.00383273	-1	47	17	31	0	WES_validated/WGS_validated
chr2	43225531	CGCCGCGCT	C	ZFP36L2	tumor_suppressor_gene	NM_006887.5	S89_A91fs	frameshift	8	6	2	0	67	118	755d3bde-76c3-45c1-8427-8e4d5d686dc1	COAD	0.8	FALSE	0.428571	0.637838	1.48829	0.153749	0.326266	-1	-1	-1	-1	-1	WES_validated/WGS_unavailable
chr2	43225540	GCCGC	ACCT	ZFP36L2	tumor_suppressor_gene	NM_006887.5	C87_G88fs	frameshift	7	9	2	0	110	105	e7af286b-3dec-4cf2-8fbd-fa64b3efdf7f	COAD	0.54	FALSE	0.5625	0.488372	0.868217	0.61271	0.821118	-1	72	30	35	0	WES_validated/WGS_validated
chr2	43225692	T	TC	ZFP36L2	tumor_suppressor_gene	NM_006887.5	T38fs	frameshift	0	2	1	0	260	133	0eda7373-8335-455f-b90a-8c3540f28088	READ	-1	FALSE	1	0.338422	0.338422	0.116237	0.271902	-1	2	1	36	0	WES_validated/WGS_validated
chr2	43225692	T	TC	ZFP36L2	tumor_suppressor_gene	NM_006887.5	T38fs	frameshift	3	2	9	0	37	45	4f786107-3cf5-4ab3-bba4-f399dee23f0e	COAD	0.83	FALSE	0.4	0.54878	1.37195	0.657706	0.856398	-1	-1	-1	-1	-1	WES_validated/WGS_unavailable
chr2	43225692	T	TC	ZFP36L2	tumor_suppressor_gene	NM_006887.5	T38fs	frameshift	1	1	1	0	139	133	c113808a-773f-4179-82d6-9083518404b5	COAD	0.53	FALSE	0.5	0.488971	0.977941	1	1	-1	66	54	40	0	WES_validated/WGS_validated
chr2	43225745	TTC	T	ZFP36L2	tumor_suppressor_gene	NM_006887.5	E19_K20fs	frameshift	2	3	3	0	115	34	955464c8-9c62-430c-87b8-107db5c980a8	COAD	0.88	FALSE	0.6	0.228188	0.380313	0.0900754	0.223627	-1	-1	-1	-1	-1	WES_validated/WGS_unavailable
chr2	43225745	TTC	T	ZFP36L2	tumor_suppressor_gene	NM_006887.5	E19_K20fs	frameshift	4	3	1	0	68	37	2db3c23d-c591-4ea0-b0a8-ed9c4343c80e	COAD	0.6	FALSE	0.428571	0.352381	0.822222	0.698757	0.877718	-1	1	1	0	0	WES_validated/WGS_validated
chr2	47803501	CC	T	MSH6	tumor_suppressor_gene	NM_000179.3	T1085fs	frameshift	9	32	24	16	2	25	51de7e94-e2fa-420b-9aa2-3637d17fc6ea	UCEC	0.6	FALSE	0.780488	0.925926	1.18634	0.178857	0.364045	-1	24	104	22	15	WES_validated/WGS_validated
chr2	147926116	TA	T	ACVR2A	tumor_suppressor_gene	NM_001616.5	K435fs	frameshift	75	1	83	0	11	3	a9017cd4-df30-46eb-b08f-39540b15243f	HNSC	0.47	FALSE	0.0131579	0.214286	16.2857	0.0112183	0.0417771	-1	-1	-1	-1	-1	WES_validated/WGS_unavailable
chr2	147926116	TA	T	ACVR2A	tumor_suppressor_gene	NM_001616.5	K435fs	frameshift	9	51	54	5	4	20	68801d41-535f-4b38-989b-ef4fe5f00039	COAD	0.81	FALSE	0.85	0.833333	0.980392	1	1	-1	15	84	33	0	WES_validated/WGS_validated
chr2	147926116	TA	T	ACVR2A	tumor_suppressor_gene	NM_001616.5	K435fs	frameshift	195	236	163	3	4	4	043a4745-566b-4106-b159-99cb8b394b81	COAD	0.55	FALSE	0.547564	0.5	0.913136	1	1	-1	-1	-1	-1	-1	WES_validated/WGS_unavailable
chr2	147926116	TA	T	ACVR2A	tumor_suppressor_gene	NM_001616.5	K435fs	frameshift	99	398	215	3	0	12	0e87e5fd-d5bb-4c0d-952d-711a6abbf336	COAD	0.73	FALSE	0.800805	1	1.24874	0.135442	0.302386	-1	-1	-1	-1	-1	WES_validated/WGS_unavailable
chr2	147926116	TA	T	ACVR2A	tumor_suppressor_gene	NM_001616.5	K435fs	frameshift	58	81	146	4	2	9	0f008098-d8aa-46dc-8445-cca59838c582	COAD	0.53	FALSE	0.582734	0.818182	1.40404	0.20078	0.395194	-1	60	65	30	0	WES_validated/WGS_validated
chr2	147926116	TA	T	ACVR2A	tumor_suppressor_gene	NM_001616.5	K435fs	frameshift	52	37	149	5	4	5	13ae9d83-a22f-451f-88bb-686051725cf3	COAD	0.38	FALSE	0.41573	0.555556	1.33634	0.491448	0.721669	-1	5	3	6	0	WES_validated/WGS_validated
chr2	147926116	TA	T	ACVR2A	tumor_suppressor_gene	NM_001616.5	K435fs	frameshift	13	11	99	0	11	24	19d1a5fc-3ce9-4e43-a364-a4150bcf911b	COAD	0.56	FALSE	0.458333	0.685714	1.4961	0.10802	0.260536	-1	57	39	35	0	WES_validated/WGS_validated
chr2	147926116	TA	T	ACVR2A	tumor_suppressor_gene	NM_001616.5	K435fs	frameshift	35	93	108	2	5	15	3758f4f7-ac2f-4f9d-bee2-526196f8129a	COAD	0.7	FALSE	0.726562	0.75	1.03226	1	1	-1	-1	-1	-1	-1	WES_validated/WGS_unavailable
chr2	147926116	TA	T	ACVR2A	tumor_suppressor_gene	NM_001616.5	K435fs	frameshift	92	12	110	1	28	4	3886b4fb-ba22-4a50-b11a-a6893951f170	BRCA	0.48	FALSE	0.115385	0.125	1.08333	1	1	-1	79	12	36	0	WES_validated/WGS_validated
chr2	147926116	TA	T	ACVR2A	tumor_suppressor_gene	NM_001616.5	K435fs	frameshift	126	215	123	2	8	30	4c6c8d3d-e4a3-490a-9211-cfbe7e6ee25b	COAD	-1	FALSE	0.630499	0.789474	1.25214	0.0722748	0.189543	-1	33	59	19	0	WES_validated/WGS_validated
chr2	147926116	TA	T	ACVR2A	tumor_suppressor_gene	NM_001616.5	K435fs	frameshift	32	34	59	2	9	21	4f601d7b-8db1-4c6d-9374-21dcd804980d	COAD	0.56	FALSE	0.515152	0.7	1.35882	0.119816	0.276796	-1	60	54	30	0	WES_validated/WGS_validated
chr2	147926116	TA	T	ACVR2A	tumor_suppressor_gene	NM_001616.5	K435fs	frameshift	64	18	72	2	4	10	567ddc8e-2b00-417d-a326-479cb02e08dd	COAD	0.23	TRUE	0.219512	0.714286	3.25397	0.00049459	0.0028779	-1	-1	-1	-1	-1	WES_validated/WGS_unavailable
chr2	147926116	TA	T	ACVR2A	tumor_suppressor_gene	NM_001616.5	K435fs	frameshift	115	47	66	3	11	7	57a2044d-20cc-4d02-b268-ce570a0fabe3	COAD	0.56	FALSE	0.290123	0.388889	1.34043	0.420532	0.656476	-1	-1	-1	-1	-1	WES_validated/WGS_unavailable
chr2	147926116	TA	T	ACVR2A	tumor_suppressor_gene	NM_001616.5	K435fs	frameshift	40	33	74	3	12	8	5e7074a6-5011-4dc5-950c-41365dbc6d09	COAD	0.5	FALSE	0.452055	0.4	0.884848	0.801046	0.940446	-1	-1	-1	-1	-1	WES_validated/WGS_unavailable
chr2	147926116	TA	T	ACVR2A	tumor_suppressor_gene	NM_001616.5	K435fs	frameshift	23	92	138	3	5	5	654c6f5c-3e5c-49f0-b53f-87cd9797d7c9	COAD	0.78	FALSE	0.8	0.5	0.625	0.0441391	0.130456	-1	0	1	38	0	WES_validated/WGS_validated
chr2	147926116	TA	T	ACVR2A	tumor_suppressor_gene	NM_001616.5	K435fs	frameshift	19	42	101	2	2	18	7570761b-c333-40df-ac8c-9b7f94c58ef9	COAD	0.66	FALSE	0.688525	0.9	1.30714	0.0798312	0.206452	-1	35	80	42	0	WES_validated/WGS_validated
chr2	147926116	TA	T	ACVR2A	tumor_suppressor_gene	NM_001616.5	K435fs	frameshift	33	74	127	3	2	6	7a481097-14a3-4916-9632-d899c25fd284	COAD	0.71	FALSE	0.691589	0.75	1.08446	1	1	-1	-1	-1	-1	-1	WES_validated/WGS_unavailable
chr2	147926116	TA	T	ACVR2A	tumor_suppressor_gene	NM_001616.5	K435fs	frameshift	29	33	91	5	5	8	93690a96-421c-4c59-85ba-fa6dd538c721	COAD	0.61	FALSE	0.532258	0.615385	1.15618	0.761169	0.91628	-1	-1	-1	-1	-1	WES_validated/WGS_unavailable
chr2	147926116	TA	T	ACVR2A	tumor_suppressor_gene	NM_001616.5	K435fs	frameshift	11	57	69	2	8	25	955464c8-9c62-430c-87b8-107db5c980a8	COAD	0.88	FALSE	0.838235	0.757576	0.903775	0.416586	0.653395	-1	16	82	21	0	WES_validated/WGS_validated
chr2	147926116	TA	T	ACVR2A	tumor_suppressor_gene	NM_001616.5	K435fs	frameshift	22	72	93	4	0	14	9743d31a-ea8f-4847-87d2-ebf77cc5983d	COAD	0.74	FALSE	0.765957	1	1.30556	0.068577	0.181895	-1	-1	-1	-1	-1	WES_validated/WGS_unavailable
chr2	147926116	TA	T	ACVR2A	tumor_suppressor_gene	NM_001616.5	K435fs	frameshift	11	44	59	1	0	7	a6f98ee5-9638-4ebe-804b-fba54aea9f90	COAD	0.85	FALSE	0.8	1	1.25	0.334476	0.568242	-1	12	93	34	0	WES_validated/WGS_validated
chr2	147926116	TA	T	ACVR2A	tumor_suppressor_gene	NM_001616.5	K435fs	frameshift	29	27	61	2	4	6	a8b4284d-cbbb-43e3-897b-d04af4bfba74	COAD	0.86	FALSE	0.482143	0.6	1.24444	0.733016	0.899813	-1	-1	-1	-1	-1	WES_validated/WGS_unavailable
chr2	147926116	TA	T	ACVR2A	tumor_suppressor_gene	NM_001616.5	K435fs	frameshift	27	20	66	2	2	8	aec0c661-afac-4f7a-8c31-154d743f2499	COAD	0.74	FALSE	0.425532	0.8	1.88	0.0411218	0.122706	-1	29	33	39	0	WES_validated/WGS_validated
chr2	147926116	TA	T	ACVR2A	tumor_suppressor_gene	NM_001616.5	K435fs	frameshift	169	360	241	3	0	8	b16bb717-d1cf-4237-a554-43f3995b82f2	COAD	-1	FALSE	0.680529	1	1.46944	0.0613923	0.167124	-1	-1	-1	-1	-1	WES_validated/WGS_unavailable
chr2	147926116	TA	T	ACVR2A	tumor_suppressor_gene	NM_001616.5	K435fs	frameshift	131	85	70	1	2	5	b612d491-7442-4119-a53c-5ebcc35c31f4	COAD	-1	FALSE	0.393519	0.714286	1.81513	0.121362	0.278297	-1	87	26	21	0	WES_validated/WGS_validated
chr2	147926116	TA	T	ACVR2A	tumor_suppressor_gene	NM_001616.5	K435fs	frameshift	13	52	98	2	4	10	bf69a4ce-ec7e-4752-a86d-dcc80e3c9a57	COAD	0.65	FALSE	0.8	0.714286	0.892857	0.486102	0.719107	-1	21	66	45	0	WES_validated/WGS_validated
chr2	147926116	TA	T	ACVR2A	tumor_suppressor_gene	NM_001616.5	K435fs	frameshift	25	83	66	2	6	26	c21d2c68-920f-4526-b754-286579c049f3	COAD	0.79	FALSE	0.768519	0.8125	1.05723	0.808777	0.943588	-1	-1	-1	-1	-1	WES_validated/WGS_unavailable
chr2	147926116	TA	T	ACVR2A	tumor_suppressor_gene	NM_001616.5	K435fs	frameshift	84	71	122	4	4	16	c8d7eb0f-2502-4277-a8ef-435b08f3c863	COAD	0.42	FALSE	0.458065	0.8	1.74648	0.00428312	0.018461	-1	65	58	30	0	WES_validated/WGS_validated
chr2	147926116	TA	T	ACVR2A	tumor_suppressor_gene	NM_001616.5	K435fs	frameshift	201	244	236	6	1	5	cbdabbcd-d8f1-4d7c-9e18-ebd83d888c51	COAD	0.29	FALSE	0.548315	0.833333	1.51981	0.230937	0.43913	-1	-1	-1	-1	-1	WES_validated/WGS_unavailable
chr2	147926116	TA	T	ACVR2A	tumor_suppressor_gene	NM_001616.5	K435fs	frameshift	245	117	238	7	4	7	cc53bf9e-5e27-4305-a08b-552120c10aa5	COAD	0.39	FALSE	0.323204	0.636364	1.96892	0.0467315	0.136391	-1	64	41	21	0	WES_validated/WGS_validated
chr2	147926116	TA	T	ACVR2A	tumor_suppressor_gene	NM_001616.5	K435fs	frameshift	68	71	178	4	5	14	da21e143-dbf6-4ac7-8872-f1d9ae39512d	COAD	0.44	FALSE	0.510791	0.736842	1.44255	0.0857505	0.216939	-1	34	45	50	0	WES_validated/WGS_validated
chr2	147926116	TA	T	ACVR2A	tumor_suppressor_gene	NM_001616.5	K435fs	frameshift	8	11	65	3	7	11	eeb42912-0c7a-46bb-bd95-369b2b425727	COAD	0.59	FALSE	0.578947	0.611111	1.05556	1	1	-1	47	36	46	0	WES_validated/WGS_validated
chr2	147926116	TA	T	ACVR2A	tumor_suppressor_gene	NM_001616.5	K435fs	frameshift	21	107	89	3	4	34	eed7405f-f8f3-41a4-a0e7-242f23087f59	COAD	0.77	FALSE	0.835938	0.894737	1.07034	0.448892	0.683991	-1	20	75	28	0	WES_validated/WGS_validated
chr2	147926116	TA	T	ACVR2A	tumor_suppressor_gene	NM_001616.5	K435fs	frameshift	70	152	53	1	3	10	f89bbd17-c732-4847-b71c-a8627a702747	COAD	0.73	FALSE	0.684685	0.769231	1.12348	0.75923	0.91628	-1	32	75	43	0	WES_validated/WGS_validated
chr2	147927266	AGT	A	ACVR2A	tumor_suppressor_gene	NM_001616.5	S512fs	frameshift	34	3	38	0	32	9	7c40c747-5000-4f66-aab5-c53fb96337cb	PRAD	-1	FALSE	0.0810811	0.219512	2.70732	0.120704	0.277471	-1	67	10	26	0	WES_validated/WGS_validated
chr2	177234208	ATAC	A	NFE2L2	oncogene	NM_006164.5	V36del	proteinDel	18	1	34	0	819	91	b80ced5e-36b1-48d0-a8a9-0245aeb5f368	LUSC	0.65	FALSE	0.0526316	0.1	1.9	1	1	3	92	14	44	0	WES_validated/WGS_validated
chr2	177234208	ATACTTCTCGACT	A	NFE2L2	oncogene	NM_006164.5	S33_V36del	proteinDel	28	10	31	0	352	179	4c806d29-1674-4542-9f30-5c9a0fc184c4	LUSC	-1	FALSE	0.263158	0.3371	1.28098	0.379626	0.614664	3	-1	-1	-1	-1	WES_validated/WGS_unavailable
chr2	177234229	G	GATCTAT	NFE2L2	oncogene	NM_006164.5	D29>DID	proteinIns	17	5	32	0	45	25	1070ff27-17c9-43dd-a4f6-daa643eb9123	LUAD	0.33	FALSE	0.227273	0.357143	1.57143	0.306362	0.535127	3	-1	-1	-1	-1	WES_validated/WGS_unavailable
chr2	177234231	TCTATATCTTGCCTCC	T	NFE2L2	oncogene	NM_006164.5	W24_D29>Y	proteinDel	35	145	128	0	21	60	bfd20d71-18a5-4f01-8d56-84378ad92359	LIHC	0.69	FALSE	0.805556	0.740741	0.91954	0.256127	0.469398	0	30	97	41	0	WES_validated/WGS_validated
chr2	197416773	GAGTGGC	G	SF3B1	oncogene	NM_012433.4	A210_T211del	proteinDel	465	29	332	0	339	23	18eb4dfc-556f-4bf3-a411-4780209ed1e0	BRCA	0.61	FALSE	0.0587045	0.0635359	1.0823	0.774008	0.92128	0	37	2	40	0	WES_validated/WGS_validated
chr2	201286566	GA	G	CASP8	tumor_suppressor_gene	NM_001228.4	R488fs	frameshift	23	2	32	0	83	23	27988b3e-cde1-4f4b-82a1-6d8ad08db8e9	STAD	0.47	FALSE	0.08	0.216981	2.71226	0.159592	0.334641	-1	-1	-1	-1	-1	WES_validated/WGS_unavailable
chr2	224478227	CTTCT	C	CUL3	tumor_suppressor_gene	NM_003590.5	K715_K716fs	frameshift	46	4	67	0	92	76	ce137f49-d12b-4112-825a-e673545f54e5	LUSC	-1	TRUE	0.08	0.452381	5.65476	5.74e-07	7.43e-06	-1	74	12	53	0	WES_validated/WGS_validated
chr3	10142018	GCGGCCGCGGCC	G	VHL	tumor_suppressor_gene	NM_000551.4	R58_P61fs	frameshift	2	2	3	0	7	20	1d0225b5-f515-4197-bba7-3dc17e502b88	OV	0.7	FALSE	0.5	0.740741	1.48148	0.559511	0.783315	-1	-1	-1	-1	-1	WES_validated/WGS_unavailable
chr3	10142030	C	CG	VHL	tumor_suppressor_gene	NM_000551.4	V62fs	frameshift	5	2	19	0	19	3	9f632fc3-2241-469a-a14a-cd537350155f	KIRC	0.43	FALSE	0.285714	0.136364	0.477273	0.568818	0.79182	-1	0	0	5	0	WES_validated/WGS_failed_with_probability_1
chr3	10142032	TGCTGCGCTC	CTA	VHL	tumor_suppressor_gene	NM_000551.4	V62_S65fs	frameshift	5	6	9	0	27	9	d23d354d-04b0-4ff4-bd83-6a2d1ecf3b47	KIRC	0.43	FALSE	0.545455	0.25	0.458333	0.136101	0.302386	-1	-1	-1	-1	-1	WES_validated/WGS_unavailable
chr3	10142057	GCCCT	G	VHL	tumor_suppressor_gene	NM_000551.4	P71_S72fs	frameshift	10	3	30	0	4	3	22b6724c-a59f-4796-8166-992253e8caf1	KIRC	0.55	FALSE	0.230769	0.428571	1.85714	0.612616	0.821118	-1	-1	-1	-1	-1	WES_validated/WGS_unavailable
chr3	10142085	AGTCC	TA	VHL	tumor_suppressor_gene	NM_000551.4	S80_P81>*	nonsense	1	1	3	0	15	8	c814c26c-ee8e-4fd8-a3d3-441b302ead3b	KIRC	0.74	FALSE	0.5	0.347826	0.695652	1	1	-1	-1	-1	-1	-1	WES_validated/WGS_unavailable
chr3	10142113	T	TCA	VHL	tumor_suppressor_gene	NM_000551.4	L89fs	frameshift	7	2	10	0	39	17	0df9ec46-d600-4845-9d00-2dc2732c68d1	KIRC	0.55	FALSE	0.222222	0.303571	1.36607	1	1	-1	32	25	41	0	WES_validated/WGS_validated
chr3	10142113	TCAACTTCGACGGCGAGCCGCAGCCCTACC	T	VHL	tumor_suppressor_gene	NM_000551.4	L89_P99fs	frameshift	8	4	44	0	32	7	0c139772-e303-45d1-b0c7-438fa1db105e	KIRC	0.49	FALSE	0.333333	0.179487	0.538462	0.261946	0.477342	-1	-1	-1	-1	-1	WES_validated/WGS_unavailable
chr3	10142121	GA	G	VHL	tumor_suppressor_gene	NM_000551.4	D92fs	frameshift	12	2	26	0	27	6	900b5f21-e8fb-4a3f-b8e3-ef098716e508	KIRC	0.4	FALSE	0.142857	0.181818	1.27273	1	1	-1	31	6	31	0	WES_validated/WGS_validated
chr3	10142144	AAC	A	VHL	tumor_suppressor_gene	NM_000551.4	T100fs	frameshift	5	7	24	0	7	9	4c44f4a4-1529-4897-9f69-c8e6c705f905	KIRC	0.86	FALSE	0.583333	0.5625	0.964286	1	1	-1	-1	-1	-1	-1	WES_validated/WGS_unavailable
chr3	10142149	TGCCGCCTGGCA	T	VHL	tumor_suppressor_gene	NM_000551.4	L101_T105fs	frameshift	11	2	9	0	13	3	36ed3269-0a57-4c50-bbfa-cfd2a7b56d4f	KIRC	0.73	FALSE	0.153846	0.1875	1.21875	1	1	-1	-1	-1	-1	-1	WES_validated/WGS_unavailable
chr3	10142152	CGCCTG	C	VHL	tumor_suppressor_gene	NM_000551.4	P102_G104fs	frameshift	15	5	23	0	15	6	c5bf474c-6919-47b4-ba59-34ab20c087d5	KIRC	0.5	FALSE	0.25	0.285714	1.14286	1	1	-1	-1	-1	-1	-1	WES_validated/WGS_unavailable
chr3	10142156	T	TGGCAC	VHL	tumor_suppressor_gene	NM_000551.4	G106fs	frameshift	1	1	9	0	22	9	52db2d93-fcc6-4f80-9668-a0a6ea450738	KIRC	0.53	FALSE	0.5	0.290323	0.580645	0.520833	0.750382	-1	52	24	53	0	WES_validated/WGS_validated
chr3	10142158	GCA	G	VHL	tumor_suppressor_gene	NM_000551.4	G104_T105fs	frameshift	6	3	35	0	21	4	e4da964a-31da-4b81-b6ee-2c6dcee703ea	KIRC	0.56	FALSE	0.333333	0.16	0.48	0.348173	0.581955	-1	-1	-1	-1	-1	WES_validated/WGS_unavailable
chr3	10146635	AG	A	VHL	tumor_suppressor_gene	NM_000551.4	V155fs	frameshift	24	4	59	0	0	3	09d7ce7a-774e-4784-9c9a-32b766fdb173	KIRC	0.48	FALSE	0.142857	1	7	0.00778643	0.0305872	-1	-1	-1	-1	-1	WES_validated/WGS_unavailable
chr3	10149957	GGA	G	VHL	tumor_suppressor_gene	NM_000551.4	G212fs	frameshift	11	5	46	0	34	16	5daf4808-0393-4791-9927-742c30a20831	KIRC	0.62	FALSE	0.3125	0.32	1.024	1	1	-1	-1	-1	-1	-1	WES_validated/WGS_unavailable
chr3	41224601	ACCTGGACTC	A	CTNNB1	oncogene	NM_001904.4	L31_S33del	proteinDel	35	2	49	0	186	90	f3f024c2-52f1-400e-946c-398f5b72e6dc	LUAD	0.27	TRUE	0.0540541	0.326087	6.03261	0.000369543	0.00221964	0	2	2	51	0	WES_validated/WGS_validated
chr3	41224613	GAATCCATTCTGGT	AA	CTNNB1	oncogene	NM_001904.4	G34_G38>E	proteinDel	15	7	36	0	95	43	30aba886-5152-4e25-b36f-6ce7009d419e	PRAD	0.39	FALSE	0.318182	0.311594	0.979296	1	1	0	62	32	34	0	WES_validated/WGS_validated
chr3	47017184	TT	A	SETD2	tumor_suppressor_gene	NM_014159.6	N2535fs	frameshift	79	1	153	0	53	9	dc43cfe0-8880-419f-946c-c0ad586e57ca	KIRC	0.93	FALSE	0.0125	0.145161	11.6129	0.00260521	0.0121272	-1	-1	-1	-1	-1	WES_validated/WGS_unavailable
chr3	47062264	GTC	G	SETD2	tumor_suppressor_gene	NM_014159.6	D2064fs	frameshift	97	221	331	0	29	23	f625e522-226b-450f-af94-dd2f5adb605e	LGG	0.66	FALSE	0.694969	0.442308	0.636443	0.000764543	0.00411439	-1	29	63	30	0	WES_validated/WGS_validated
chr3	47123537	AAG	A	SETD2	tumor_suppressor_gene	NM_014159.6	P366fs	frameshift	0	1	1	0	23	2	03ae8fdb-8a9c-401d-b8e3-b5ea57bad182	KIRC	0.38	FALSE	1	0.08	0.08	0.115385	0.270885	-1	-1	-1	-1	-1	WES_validated/WGS_unavailable
chr3	47123662	T	TC	SETD2	tumor_suppressor_gene	NM_014159.6	E325fs	frameshift	6	6	20	2	23	18	96607b17-2894-4153-adde-3d970f47fe50	LAML	-1	FALSE	0.5	0.439024	0.878049	0.751336	0.912873	-1	-1	-1	-1	-1	WES_validated/WGS_unavailable
chr3	47123770	TC	T	SETD2	tumor_suppressor_gene	NM_014159.6	D289fs	frameshift	154	124	370	0	4	3	73cb1350-7590-4f79-bb86-3f395466652e	KIRC	0.6	FALSE	0.446043	0.428571	0.960829	1	1	-1	37	34	66	0	WES_validated/WGS_validated
chr3	52402338	TC	T	BAP1	tumor_suppressor_gene	NM_004656.4	R713fs	frameshift	4	3	11	0	8	140	ce7dcb92-13aa-4496-82d2-873b53647bfd	LUSC	0.6	TRUE	0.428571	0.945946	2.20721	0.000657447	0.00364674	-1	53	40	46	0	WES_validated/WGS_validated
chr3	52402357	GC	G	BAP1	tumor_suppressor_gene	NM_004656.4	G707fs	frameshift	7	1	6	0	104	41	9dc7812b-c7a2-4de4-bf6d-4c7261384a62	KIRC	0.53	FALSE	0.125	0.282759	2.26207	0.446736	0.681822	-1	23	2	36	0	WES_validated/WGS_validated
chr3	52402380	GC	G	BAP1	tumor_suppressor_gene	NM_004656.4	R699fs	frameshift	4	2	16	0	41	86	028d32fc-1b9f-49c6-9cb2-2d69671943cd	KIRC	0.58	FALSE	0.333333	0.677165	2.0315	0.17909	0.364045	-1	-1	-1	-1	-1	WES_validated/WGS_unavailable
chr3	52402386	CG	C	BAP1	tumor_suppressor_gene	NM_004656.4	S697fs	frameshift	3	4	11	0	24	63	70820391-13b4-438f-ba4a-c0804d4c2d76	KIRC	0.43	FALSE	0.571429	0.724138	1.26724	0.405588	0.644373	-1	39	36	39	0	WES_validated/WGS_validated
chr3	52402634	ATGAACTCATCGTAGTTG	A	BAP1	tumor_suppressor_gene	NM_004656.4	H669_I675fs	frameshift	5	4	15	0	40	76	dcc87c59-fd8c-4511-9983-96d5b9784cb0	CHOL	0.47	FALSE	0.444444	0.655172	1.47414	0.281184	0.504397	-1	100	28	43	0	WES_validated/WGS_validated
chr3	52403661	G	GT	BAP1	tumor_suppressor_gene	NM_004656.4	T495fs	frameshift	2	4	22	0	11	7	f2d42e03-ca8d-4b57-ae39-0cc8f37b1b67	CHOL	0.86	FALSE	0.666667	0.388889	0.583333	0.357225	0.590721	-1	10	53	33	0	WES_validated/WGS_validated
chr3	52406851	GCTCCATGATGACCCGC	G	BAP1	tumor_suppressor_gene	NM_004656.4	R207_E212fs	frameshift	0	1	3	0	4	13	a08e4c1d-5d92-43ec-b0b9-87b2286d685e	UVM	0.92	FALSE	1	0.764706	0.764706	1	1	-1	6	40	37	0	WES_validated/WGS_validated
chr3	52408039	G	GC	BAP1	tumor_suppressor_gene	NM_004656.4	S98fs	frameshift	3	2	16	0	16	43	e21d8018-8fe9-4c92-8b36-28d7d3f7df2b	UVM	0.72	FALSE	0.4	0.728814	1.82203	0.15022	0.323086	-1	27	39	35	0	WES_validated/WGS_validated
chr3	52408531	CACCAAGGTAGAGACCTTTCGCCGGG	C	BAP1	tumor_suppressor_gene	NM_004656.4	S58_V66fs	frameshift	7	6	14	0	16	48	08a52bcf-d2e9-497b-938a-4660c332e914	CESC	0.57	FALSE	0.461538	0.75	1.625	0.0505008	0.145661	-1	53	53	35	0	WES_validated/WGS_validated
chr3	52408531	CACCAAGGTAGAGACCTTTCGCCGGGACCGGCG	C	BAP1	tumor_suppressor_gene	NM_004656.4	R56_V66fs	frameshift	0	8	16	0	3	46	4e531546-56f1-4165-94a2-ee45abd5e0f7	UVM	0.94	FALSE	1	0.938776	0.938776	1	1	-1	11	59	57	0	WES_validated/WGS_validated
chr3	52408540	AGAGACCTT	C	BAP1	tumor_suppressor_gene	NM_004656.4	K61_S63fs	frameshift	1	5	25	0	4	68	9b1ecfb2-9dfb-4e71-b51a-d2a0c5a7940e	UVM	0.93	FALSE	0.833333	0.944444	1.13333	0.337242	0.571899	-1	1	2	39	0	WES_validated/WGS_validated
chr3	52409740	AG	A	BAP1	tumor_suppressor_gene	NM_004656.4	L14fs	frameshift	6	2	25	0	11	5	339490ef-6cf5-4d05-81b1-5e339e95f678	UVM	1	FALSE	0.25	0.3125	1.25	1	1	-1	36	15	27	0	WES_validated/WGS_validated
chr3	52561806	ATTCTGTC	CTTCTGT	PBRM1	tumor_suppressor_gene	NM_018313.5	G1362_W1365fs	frameshift	297	103	404	0	60	11	23c7555b-7a37-415d-bda8-3588078a0c2e	KIRC	0.52	FALSE	0.2575	0.15493	0.601668	0.0712509	0.188451	-1	-1	-1	-1	-1	WES_validated/WGS_unavailable
chr3	52563420	CA	C	PBRM1	tumor_suppressor_gene	NM_018313.5	F1291fs	frameshift	16	75	88	0	1	9	295004c6-d52e-4971-82ff-84595850f548	KIRP	0.82	FALSE	0.824176	0.9	1.092	1	1	-1	18	92	26	0	WES_validated/WGS_validated
chr3	52648426	CT	C	PBRM1	tumor_suppressor_gene	NM_018313.5	S244fs	frameshift	62	58	105	3	34	14	c7afc0d0-ca32-4be1-9477-ad106290c460	LAML	0.96	FALSE	0.483333	0.291667	0.603448	0.0257439	0.0860613	-1	-1	-1	-1	-1	WES_validated/WGS_unavailable
chr3	177034233	C	CA	TBL1XR1	tumor_suppressor_gene	NM_024665.7	G405fs	frameshift	81	2	105	0	82	3	e9ccf355-e68a-489c-a914-31b766bd0aef	THCA	-1	FALSE	0.0240964	0.0352941	1.46471	1	1	-1	78	0	37	0	WES_validated/WGS_failed_with_probability_0.149190185
chr4	54285945	C	CTTT	PDGFRA	oncogene	NM_006206.6	N848>NF	proteinIns	238	12	201	0	259	13	3caf009f-d9e0-4c57-b1d9-8eb59fc833bd	GBM	0.69	FALSE	0.048	0.0477941	0.995711	1	1	3	-1	-1	-1	-1	WES_validated/WGS_unavailable
chr4	54723600	GACTTACGA	CAT	KIT	oncogene	NM_000222.3	Thr417_Asp419delinsIle	proteinDel	100	11	69	6	122	29	a7a567fa-847e-49c6-b404-f2257e00b00d	LAML	-1	FALSE	0.0990991	0.192053	1.93799	0.0548653	0.155731	3	-1	-1	-1	-1	WES_validated(rescued_known_hotspot)/WGS_unavailable
chr4	54723605	A	ACTTTTT	KIT	oncogene	NM_000222.3	Y418>YFF	proteinIns	161	7	157	2	152	8	6d271451-affa-4c76-bce5-6bf8622d83a9	LAML	-1	FALSE	0.0416667	0.05	1.2	0.795071	0.935337	3	-1	-1	-1	-1	WES_validated/WGS_unavailable
chr4	54723605	A	ACTTCTT	KIT	oncogene	NM_000222.3	Y418>YFF	proteinIns	105	18	98	5	163	35	fff35c80-88cd-4923-80c1-0273ba5bed0f	LAML	-1	FALSE	0.146341	0.176768	1.20791	0.537825	0.766792	3	-1	-1	-1	-1	WES_validated/WGS_unavailable
chr4	54727442	GGTT	G	KIT	oncogene	NM_000222.3	V560del	proteinDel	103	2	114	1	334	11	730bf0e5-50a3-4bdd-90ef-bc6d932979ce	TGCT	0.64	FALSE	0.0190476	0.0318841	1.67391	0.741379	0.904618	0	102	2	27	0	WES_validated(rescued_known_hotspot)/WGS_validated
chr4	73405133	C	CA	ALB	tumor_suppressor_gene	NM_000477.7	H33fs	frameshift	54	1	55	0	987	12	2d00f09f-0074-46c8-b357-b5f33567762a	LIHC	0.94	FALSE	0.0181818	0.012012	0.660661	0.50382	0.733152	-1	87	4	55	0	WES_validated/WGS_validated
chr4	152350113	CTTTCT	C	FBXW7	tumor_suppressor_gene	NM_033632.3	R170_K171fs	frameshift	8	4	7	0	52	6	84d32a4c-023b-4563-9eb5-e2f47818142a	STAD	0.58	FALSE	0.333333	0.103448	0.310345	0.0607042	0.166713	-1	67	13	51	0	WES_validated/WGS_validated
chr4	186596660	CG	C	FAT1	tumor_suppressor_gene	NM_005245.4	H4293fs	frameshift	56	2	59	0	279	74	b98867d7-7d5a-4c58-8878-37bee6f2f4fa	HNSC	0.18	TRUE	0.0344828	0.209632	6.07932	0.000761712	0.00411439	-1	-1	-1	-1	-1	WES_validated/WGS_unavailable
chr4	186596950	AC	A	FAT1	tumor_suppressor_gene	NM_005245.4	V4197fs	frameshift	66	1	138	0	32	3	108d4b89-d1d5-4528-a040-c7e5696c8417	UCS	0.86	FALSE	0.0149254	0.0857143	5.74286	0.115512	0.270885	-1	68	0	34	0	WES_validated/WGS_failed_with_probability_0.359667368
chr4	186603431	CTACAAAAAGTAAGACGTCCAGATGTGGG	C	FAT1	tumor_suppressor_gene	NM_005245.4	H3689_V3698fs	frameshift	75	7	76	0	47	20	4199c571-f20f-4873-afd3-5393f2f8d2db	HNSC	0.18	TRUE	0.0853659	0.298507	3.4968	0.00111014	0.00567878	-1	95	17	51	0	WES_validated/WGS_validated
chr4	186606091	TC	T	FAT1	tumor_suppressor_gene	NM_005245.4	G3443fs	frameshift	61	1	62	0	12	38	06f0cf45-3840-44b2-bfc5-18eb980b8f68	HNSC	0.24	TRUE	0.016129	0.76	47.12	3.49e-18	2.17e-16	-1	90	8	34	0	WES_validated/WGS_validated
chr4	186611647	AGAGGG	A	FAT1	tumor_suppressor_gene	NM_005245.4	T3196_L3197fs	frameshift	11	2	14	0	57	5	899f8d52-4c3a-4371-90eb-1f106001eddc	BLCA	0.62	FALSE	0.153846	0.0806452	0.524194	0.597362	0.807175	-1	-1	-1	-1	-1	WES_validated/WGS_unavailable
chr4	186619428	AT	A	FAT1	tumor_suppressor_gene	NM_005245.4	N2386fs	frameshift	47	4	44	0	298	7	4075717b-2240-4842-a00a-0c4dbcb910c4	HNSC	0.57	FALSE	0.0784314	0.0229508	0.292623	0.0572614	0.159086	-1	-1	-1	-1	-1	WES_validated/WGS_unavailable
chr4	186619507	AC	A	FAT1	tumor_suppressor_gene	NM_005245.4	V2360fs	frameshift	128	1	139	0	338	4	63f6a127-e4e8-4e1c-8236-a2adb9594c8f	HNSC	0.68	FALSE	0.00775194	0.0116959	1.50877	1	1	-1	152	1	41	0	WES_validated/WGS_validated
chr4	186620937	T	TA	FAT1	tumor_suppressor_gene	NM_005245.4	L1883fs	frameshift	54	6	45	0	31	7	513b1a26-8f1b-49a0-8957-de10930e6c98	HNSC	0.27	FALSE	0.1	0.184211	1.84211	0.241192	0.450595	-1	101	3	50	0	WES_validated/WGS_validated
chr4	186621404	C	CA	FAT1	tumor_suppressor_gene	NM_005245.4	E1728fs	frameshift	72	1	76	0	31	23	23c4e2eb-142b-4fcc-a974-9a248aec3f37	HNSC	0.47	TRUE	0.0136986	0.425926	31.0926	1.65e-09	3.19e-08	-1	113	3	50	0	WES_validated/WGS_validated
chr4	186707964	CCG	A	FAT1	tumor_suppressor_gene	NM_005245.4	S621_G622fs	frameshift	16	33	74	0	17	12	890b5a8b-703d-428d-8833-bc0ce26e80aa	HNSC	0.62	FALSE	0.673469	0.413793	0.61442	0.033472	0.103875	-1	25	48	31	0	WES_validated/WGS_validated
chr5	36984809	TG	T	NIPBL	tumor_suppressor_gene	NM_133433.4	D544fs	frameshift	190	557	300	13	12	28	3c975b68-4a6e-4c97-a8d1-b9a427d4957c	HNSC	0.85	FALSE	0.745649	0.7	0.938779	0.57711	0.799538	-1	-1	-1	-1	-1	WES_validated/WGS_unavailable
chr5	37006545	TTATCCTCAGTATG	T	NIPBL	tumor_suppressor_gene	NM_133433.4	Y1349_D1353fs	frameshift	24	4	41	1	16	4	0df37550-9421-4571-9844-51b457d7cb2b	LGG	0.73	FALSE	0.142857	0.2	1.4	0.703089	0.880312	-1	64	22	45	0	WES_validated/WGS_validated
chr5	56875145	G	GGA	MAP3K1	tumor_suppressor_gene	NM_005921.2	S602fs	frameshift	135	13	30	0	39	18	42e47f3a-dff7-41e4-8f84-146d97e8ab72	BRCA	0.66	TRUE	0.0878378	0.315789	3.59514	0.00012879	0.000894801	-1	97	16	30	0	WES_validated/WGS_validated
chr5	56881183	TATAG	T	MAP3K1	tumor_suppressor_gene	NM_005921.2	I761_D762fs	frameshift	33	5	30	0	34	23	57cf380d-ab52-467f-b9ae-740b2f84c820	BRCA	0.37	FALSE	0.131579	0.403509	3.06667	0.00553869	0.0229179	-1	-1	-1	-1	-1	WES_validated/WGS_unavailable
chr5	56881690	A	AC	MAP3K1	tumor_suppressor_gene	NM_005921.2	H832fs	frameshift	40	14	8	0	30	9	09d6e904-7184-4788-8a19-04f8c46cb13f	BRCA	0.6	FALSE	0.259259	0.230769	0.89011	0.811399	0.943588	-1	42	23	34	0	WES_validated/WGS_validated
chr5	56881793	AT	A	MAP3K1	tumor_suppressor_gene	NM_005921.2	I865fs	frameshift	29	2	39	0	145	105	3ca67cd0-81da-4f68-a9fa-f1a8c013c28d	BRCA	1	TRUE	0.0645161	0.42	6.51	4.87e-05	0.000408391	-1	-1	-1	-1	-1	WES_validated/WGS_unavailable
chr5	56882023	A	AAC	MAP3K1	tumor_suppressor_gene	NM_005921.2	T943fs	frameshift	25	3	15	0	58	13	57cf380d-ab52-467f-b9ae-740b2f84c820	BRCA	0.37	FALSE	0.107143	0.183099	1.70892	0.545532	0.773044	-1	112	19	42	0	WES_validated/WGS_validated
chr5	56887489	T	TA	MAP3K1	tumor_suppressor_gene	NM_005921.2	L1409fs	frameshift	46	1	61	0	17	4	2a84997d-ccee-4f46-bea2-752534f26416	BRCA	0.46	FALSE	0.0212766	0.190476	8.95238	0.0289371	0.0938691	-1	-1	-1	-1	-1	WES_validated/WGS_unavailable
chr5	56893540	GC	G	MAP3K1	tumor_suppressor_gene	NM_005921.2	A1467fs	frameshift	114	1	95	0	272	3	79126e88-9cf8-45ff-bf91-a98da3b304d7	BRCA	-1	FALSE	0.00869565	0.0109091	1.25455	1	1	-1	-1	-1	-1	-1	WES_validated/WGS_unavailable
chr5	68293755	TACATGAATATAACAC	T	PIK3R1	oncogene	NM_181523.3	L449_T454>F	proteinDel	64	2	65	0	130	27	38a4e9bd-93e9-432d-a756-3b1055b823bd	BRCA	0.39	FALSE	0.030303	0.171975	5.67516	0.00376078	0.016438	0	134	0	34	0	WES_validated/WGS_failed_with_probability_0.0161893409480223_vial_mismatch_TCGA-LD-A74U-01A_WES_and_TCGA-LD-A74U-01B_WGS
chr5	68293756	ACATGAATATAACACTCAGTTTCAA	T	PIK3R1	oncogene	NM_181523.3	L449_Q457>F	proteinDel	51	1	113	0	61	7	6623fc5e-00be-4476-967a-cbd55f676ea6	BRCA	0.47	FALSE	0.0192308	0.102941	5.35294	0.135707	0.302386	0	93	0	29	0	WES_validated/WGS_failed_with_probability_0.16432946
chr5	68293757	CATG	C	PIK3R1	oncogene	NM_181523.3	H450_E451>Q	proteinDel	156	4	203	0	199	17	26573441-eedb-4364-966c-e7f803deef19	BRCA	0.29	FALSE	0.025	0.0787037	3.14815	0.0385146	0.116042	0	90	0	33	0	WES_validated/WGS_failed_with_probability_0.102427226
chr5	68293757	CATGAAT	C	PIK3R1	oncogene	NM_181523.3	E451_Y452del	proteinDel	32	2	56	0	191	16	e669a4b7-a494-490a-b78c-e664c59d0697	LGG	0.84	FALSE	0.0588235	0.0772947	1.31401	1	1	0	91	1	33	0	WES_validated/WGS_validated
chr5	68293760	GAATA	TG	PIK3R1	oncogene	NM_181523.3	E451_Y452>C	proteinDel	150	3	132	0	206	10	d3d4d709-ab34-4617-aa8c-51a3d0a3efe6	BRCA	0.41	FALSE	0.0196078	0.0462963	2.36111	0.252604	0.464771	0	-1	-1	-1	-1	WES_validated/WGS_unavailable
chr5	68293763	T	TATA	PIK3R1	oncogene	NM_181523.3	N453>NN	proteinIns	27	1	50	0	214	51	c2c16878-b615-496c-8fcb-d49c97e15551	LGG	0.35	FALSE	0.0357143	0.192453	5.38868	0.0376964	0.114691	0	66	14	34	0	WES_validated/WGS_validated
chr5	68295275	ATTAAACCAGACC	A	PIK3R1	oncogene	NM_181523.3	K567_L570del	proteinDel	33	1	33	0	72	48	f81ac8a2-4ce6-439e-b027-1c0bfc88ceaa	BRCA	0.23	TRUE	0.0294118	0.4	13.6	1.39e-05	0.00013484	0	-1	-1	-1	-1	WES_validated/WGS_unavailable
chr5	68295302	AAGACGAG	A	PIK3R1	tumor_suppressor_gene	NM_181523.3	K575_R577fs	frameshift	37	4	53	0	21	12	de5abe44-6d9d-4797-a57a-5adfd71383f0	UCEC	0.65	FALSE	0.097561	0.363636	3.72727	0.00944993	0.0357637	-1	69	22	41	0	WES_validated/WGS_validated
chr5	68296291	TTTTC	T	PIK3R1	tumor_suppressor_gene	NM_181523.3	F646_L647fs	frameshift	185	8	192	0	34	5	62d71839-4fba-42e9-9929-8d937f0fe287	UCEC	0.69	FALSE	0.0414508	0.128205	3.09295	0.0476982	0.138772	-1	-1	-1	-1	-1	WES_validated/WGS_unavailable
chr5	68297425	G	GT	PIK3R1	tumor_suppressor_gene	NM_181523.3	V667fs	frameshift	148	3	239	0	38	5	d3c83c5e-acb1-4cb0-8f56-96341822582f	UCEC	0.85	FALSE	0.0198676	0.116279	5.85271	0.0143164	0.0516611	-1	123	4	36	0	WES_validated/WGS_validated
chr5	68297533	C	CT	PIK3R1	tumor_suppressor_gene	NM_181523.3	L703fs	frameshift	355	9	534	0	219	7	45d58088-d3f4-4eb0-b75c-bcb98c0981dc	UCEC	0.9	FALSE	0.0247253	0.0309735	1.2527	0.795145	0.935337	-1	64	1	41	0	WES_validated/WGS_validated
chr5	87378519	AAAGC	A	RASA1	tumor_suppressor_gene	NM_002890.3	E823_S824fs	frameshift	33	4	37	0	4	7	91a712b5-a724-48d0-ba06-4f6857683463	HNSC	0.27	TRUE	0.108108	0.636364	5.88636	0.00102296	0.00529096	-1	2	1	45	0	WES_validated/WGS_validated
chr5	112827132	TA	T	APC	tumor_suppressor_gene	NM_000038.6	L478fs	frameshift	112	1	41	0	11	2	7fb8e7be-4118-41f8-b785-5cbb0afdb8b7	CESC	0.67	FALSE	0.00884956	0.153846	17.3846	0.027957	0.0916477	-1	111	0	44	0	WES_validated/WGS_failed_with_probability_0.372814905
chr5	112838095	CCTCTTCATCAAGAGGAAG	TCTCT	APC	tumor_suppressor_gene	NM_000038.6	S834_S840fs	frameshift	11	42	72	0	2	5	c085da47-d634-491a-80ea-514e5a231f70	COAD	0.81	FALSE	0.792453	0.714286	0.901361	0.638566	0.843522	-1	16	68	49	0	WES_validated/WGS_validated
chr5	112839514	TAAAAG	T	APC	tumor_suppressor_gene	NM_000038.6	I1307_E1309fs	frameshift	91	10	129	0	1	4	26964b56-583f-46cc-ab2e-a948bf3e5432	READ	0.48	TRUE	0.0990099	0.8	8.08	0.00092849	0.00493957	-1	66	15	37	0	WES_validated/WGS_validated
chr5	112839514	TAAAAG	T	APC	tumor_suppressor_gene	NM_000038.6	I1307_E1309fs	frameshift	64	52	106	0	13	5	6cd8d2dd-5545-43b0-b796-ae0506d62eb8	COAD	-1	FALSE	0.448276	0.277778	0.619658	0.207234	0.405326	-1	10	10	14	0	WES_validated/WGS_validated
chr5	112839883	CCATGCCACCAA	C	APC	tumor_suppressor_gene	NM_000038.6	T1430_S1434fs	frameshift	31	2	87	0	27	2	7bc369b7-007b-4b10-bd92-5d326dabf675	PRAD	0.33	FALSE	0.0606061	0.0689655	1.13793	1	1	-1	83	5	43	0	WES_validated/WGS_validated
chr5	112839978	AAG	A	APC	tumor_suppressor_gene	NM_000038.6	K1462fs	frameshift	23	40	85	0	2	7	d3b7ada6-5395-4212-a921-8e97c92b605d	COAD	0.62	FALSE	0.634921	0.777778	1.225	0.481857	0.715484	-1	23	47	29	0	WES_validated/WGS_validated
chr5	112839978	AAG	A	APC	tumor_suppressor_gene	NM_000038.6	K1462fs	frameshift	64	21	89	1	7	3	ea923671-3903-4a79-830d-e7e4b1eabab0	COAD	0.62	FALSE	0.247059	0.3	1.21429	0.709409	0.885335	-1	76	28	33	0	WES_validated/WGS_validated
chr5	112841559	GA	G	APC	tumor_suppressor_gene	NM_000038.6	E1989fs	frameshift	35	2	36	0	31	3	d1fd7be0-6daa-4f1f-a198-3dca7a797e49	PRAD	0.82	FALSE	0.0540541	0.0882353	1.63235	0.665207	0.857471	-1	69	13	34	0	WES_validated/WGS_validated
chr5	177267673	AG	A	NSD1	tumor_suppressor_gene	NM_172349.2	K1484fs	frameshift	107	4	115	0	16	6	3143822c-66c4-4b58-8d29-e92d065ff049	CESC	0.29	TRUE	0.036036	0.272727	7.56818	0.00144236	0.00710496	-1	83	8	36	0	WES_validated/WGS_validated
chr5	177273776	CAT	C	NSD1	tumor_suppressor_gene	NM_172349.2	H1603fs	frameshift	17	21	57	0	5	13	c72ae014-3c05-47f9-8615-6633467bc532	HNSC	0.63	FALSE	0.552632	0.722222	1.30688	0.25715	0.470348	-1	52	52	29	0	WES_validated/WGS_validated
chr5	177280783	CCG	TCAT	NSD1	tumor_suppressor_gene	NM_172349.2	F1678_R1679fs	frameshift	59	12	70	0	17	8	600d5316-b795-4ab2-86fc-52835059386f	HNSC	0.67	FALSE	0.169014	0.32	1.89333	0.151247	0.32445	-1	71	25	78	0	WES_validated/WGS_validated
chr6	1313345	A	AGC	FOXQ1	tumor_suppressor_gene	NM_033260.4	K214fs	frameshift	6	4	26	0	7	5	dfc67e7b-3986-4129-ae02-4d8f57e776e3	BLCA	0.43	FALSE	0.4	0.416667	1.04167	1	1	-1	66	19	35	0	WES_validated/WGS_validated
chr6	29942781	TCACATCC	T	HLA-A	tumor_suppressor_gene	NM_002116.8	F33_S35fs	frameshift	39	19	89	0	808	42	eda9496e-be80-4a13-bf06-89f0cc9e937f	DLBC	0.39	FALSE	0.327586	0.0494118	0.150836	4.18e-10	9.48e-09	-1	-1	-1	-1	-1	WES_validated/WGS_unavailable
chr6	31355143	CAGCTCCGATGACCACAACT	C	HLA-B	tumor_suppressor_gene	NM_005514.8	A319_A325fs	frameshift	56	27	74	0	837	16	970b619f-2eb5-4557-a7b8-5def35943c58	CESC	0.86	FALSE	0.325301	0.0187573	0.0576614	4.77e-20	4.45e-18	-1	82	43	32	0	WES_validated/WGS_validated
chr6	31355532	C	CA	HLA-B	tumor_suppressor_gene	NM_005514.8	C227fs	frameshift	111	41	126	1	532	5	2b2bb108-ca85-4b3e-a6a6-5ffaac487c5e	HNSC	0.44	FALSE	0.269737	0.00931099	0.0345188	5.89e-24	6.09e-22	-1	72	28	56	0	WES_validated/WGS_validated
chr6	31356417	GTACATGC	G	HLA-B	tumor_suppressor_gene	NM_005514.8	S121_Y123fs	frameshift	20	18	52	0	867	22	eda9496e-be80-4a13-bf06-89f0cc9e937f	DLBC	0.39	FALSE	0.473684	0.0247469	0.0522435	7.05e-17	3.65e-15	-1	26	23	35	0	WES_validated/WGS_validated
chr6	31356786	T	TC	HLA-B	tumor_suppressor_gene	NM_005514.8	E82fs	frameshift	26	120	69	0	315	8	a1b99260-8643-4cef-95a0-3853d64762b7	CESC	0.84	FALSE	0.821918	0.0247678	0.0301342	1.17e-74	1.09e-71	-1	-1	-1	-1	-1	WES_validated/WGS_unavailable
chr6	31357101	T	TCA	HLA-B	tumor_suppressor_gene	NM_005514.8	T20fs	frameshift	18	41	86	0	586	256	53eb4c4e-0719-476f-9b2b-279d438d7710	CESC	0.67	FALSE	0.694915	0.304038	0.437518	3.76e-09	6.87e-08	-1	29	59	44	0	WES_validated/WGS_validated
chr6	31357114	CG	C	HLA-B	tumor_suppressor_gene	NM_005514.8	A15fs	frameshift	31	9	28	0	300	278	3fb3d96e-85ef-4071-a220-2382f8d9de82	HNSC	0.64	TRUE	0.225	0.480969	2.13764	0.00165476	0.00810834	-1	-1	-1	-1	-1	WES_validated/WGS_unavailable
chr6	36684143	CAGCAAGG	C	CDKN1A	tumor_suppressor_gene	NM_000389.5	S15_A17fs	frameshift	17	4	37	0	84	811	49ea6676-ae27-4ca0-a7b3-48423d606d48	BLCA	0.94	TRUE	0.190476	0.906145	4.75726	6.07e-14	1.82e-12	-1	44	34	66	0	WES_validated/WGS_validated
chr6	36684146	CAAGGC	GCCT	CDKN1A	tumor_suppressor_gene	NM_000389.5	S15_A17fs	frameshift	22	4	24	0	94	8	6c5f09f0-2019-4440-8554-e8912bce5e98	BLCA	0.33	FALSE	0.153846	0.0784314	0.509804	0.262	0.477342	-1	76	20	41	0	WES_validated/WGS_validated
chr6	36684206	TGCGCTAATGGCG	GCCCT	CDKN1A	tumor_suppressor_gene	NM_000389.5	D35_A39fs	frameshift	24	7	53	1	229	12	1426b4bf-f4a5-477c-bbbb-e0e656549764	PRAD	0.75	FALSE	0.225806	0.0497925	0.22051	0.00240753	0.0113203	-1	84	40	35	0	WES_validated/WGS_validated
chr6	36684320	G	GC	CDKN1A	tumor_suppressor_gene	NM_000389.5	K75fs	frameshift	14	12	31	0	133	138	f001cc02-8119-4726-b41c-14ac1e6a4216	BLCA	0.87	FALSE	0.461538	0.509225	1.10332	0.685346	0.871663	-1	41	40	51	0	WES_validated/WGS_validated
chr6	37171270	T	TCTTCGA	PIM1	oncogene	NM_002648.4	F132>FDF	proteinIns	80	24	98	0	513	237	f553f1a9-ecf2-4783-a609-6adca7c4c597	DLBC	0.55	FALSE	0.230769	0.316	1.36933	0.0882726	0.221234	0	-1	-1	-1	-1	WES_validated/WGS_unavailable
chr6	73519039	TAAC	T	EEF1A1	oncogene	NM_001402.6	V171del	proteinDel	79	1	58	0	974	16	62d70067-ff77-4f95-8b69-f537abaf74ce	BRCA	0.69	FALSE	0.0125	0.0161616	1.29293	1	1	0	130	4	39	0	WES_validated/WGS_validated
chr6	73519188	TCAC	T	EEF1A1	oncogene	NM_001402.6	G121del	proteinDel	67	2	65	0	945	22	3fae5b76-9e22-4eab-a7fc-13139b2b97c4	PRAD	0.67	FALSE	0.0289855	0.0227508	0.784902	0.670919	0.860366	0	-1	-1	-1	-1	WES_validated/WGS_unavailable
chr7	55173073	GCGCCACATCGTT	G	EGFR	oncogene	NM_005228.5	H672_R675del	proteinDel	919	17	52	0	970	29	a1b99260-8643-4cef-95a0-3853d64762b7	CESC	0.84	FALSE	0.0181624	0.029029	1.5983	0.135718	0.302386	0	1014	24	43	0	WES_validated/WGS_validated
chr7	55173985	AAAC	A	EGFR	oncogene	NM_005228.5	E709_T710>D	proteinDel	86	11	104	0	10	20	9e640ff7-996e-427b-b56c-519a1e23baab	LUAD	0.19	TRUE	0.113402	0.666667	5.87879	8.6e-09	1.5e-07	4	87	20	56	0	WES_validated/WGS_validated
chr7	55174771	AGGAATTAAGAGAAGC	A	EGFR	oncogene	NM_005228.5	E746_A750del	proteinDel	55	7	73	1	23	34	96dfa373-4597-49a5-942e-d9b4dc5d28fc	LUAD	0.25	TRUE	0.112903	0.596491	5.28321	2.57e-08	4.27e-07	1	-1	-1	-1	-1	WES_validated/WGS_unavailable
chr7	55174772	GGAATTAAGAGAAGCA	G	EGFR	oncogene	NM_005228.5	E746_A750del	proteinDel	96	1	105	0	63	24	4b22ad71-c585-4077-ad3c-c6e026d0c7fa	LUAD	0.5	TRUE	0.0103093	0.275862	26.7586	5.57e-08	8.65e-07	1	99	0	41	0	WES_validated/WGS_failed_with_probability_0.358468001
chr7	55174772	GGAATTAAGA	G	EGFR	oncogene	NM_005228.5	L747_E749del	proteinDel	40	12	69	0	22	28	8e41153b-9faf-45c3-8397-8a428ef5c0d5	LUAD	0.33	TRUE	0.230769	0.56	2.42667	0.00106218	0.00546349	1	74	28	50	0	WES_validated/WGS_validated
chr7	55174776	TTAAGAGAAG	C	EGFR	oncogene	NM_005228.5	L747_A750>P	proteinDel	52	31	79	0	15	55	23069f19-eba5-4ea5-ae7d-1ee4399ce7c1	LUAD	0.43	TRUE	0.373494	0.785714	2.10369	2.99e-07	4.15e-06	1	82	52	46	0	WES_validated/WGS_validated
chr7	55174776	TTAAGAGAAG	C	EGFR	oncogene	NM_005228.5	L747_A750>P	proteinDel	80	36	72	0	55	21	5f4934be-eee3-40e1-8838-38103badc898	LUAD	-1	FALSE	0.310345	0.276316	0.890351	0.632266	0.837326	1	75	33	37	0	WES_validated/WGS_validated
chr7	55181317	G	GACAACCCCC	EGFR	oncogene	NM_005228.5	N771_H773dup	proteinIns	99	10	114	0	57	29	6ccd57e5-9215-46fa-b3be-e408a0f424dc	GBM	0.3	TRUE	0.0917431	0.337209	3.67558	2.54e-05	0.000236337	3	128	20	51	0	WES_validated/WGS_validated
chr7	140778036	GTAGGTGCTGTCACAT	G	BRAF	oncogene	NM_004333.6	N486_P490del	proteinDel	41	5	24	0	13	6	a4a217c1-66e8-4cc5-805a-1172ce5da721	THCA	0.33	FALSE	0.108696	0.315789	2.90526	0.0670361	0.179341	2	33	5	30	0	WES_validated/WGS_validated
chr7	148754093	GGAATTATATAAACGACTT	A	CUL1	oncogene	NM_003592.3	L86_L92>L	proteinDel	34	3	83	0	7	14	d7641ca1-a062-4dd2-9414-447af7311a84	HNSC	0.4	TRUE	0.0810811	0.666667	8.22222	4.76e-06	5.15e-05	0	40	11	53	0	WES_validated/WGS_validated
chr7	152139727	GT	G	KMT2C	tumor_suppressor_gene	NM_170606.3	T4803fs	frameshift	92	9	154	0	79	4	8cc7679d-b963-4b45-b3f8-dcf80ea6cc71	PRAD	0.32	FALSE	0.0891089	0.0481928	0.54083	0.3889	0.624251	-1	77	1	44	0	WES_validated/WGS_validated
chr7	152151511	AC	A	KMT2C	tumor_suppressor_gene	NM_170606.3	C4199fs	frameshift	20	3	35	0	19	6	0c890030-9bdb-4247-a3d5-a004f992f99c	BLCA	0.39	FALSE	0.130435	0.24	1.84	0.465671	0.702658	-1	-1	-1	-1	-1	WES_validated/WGS_unavailable
chr7	152156207	TC	T	KMT2C	tumor_suppressor_gene	NM_170606.3	E3937fs	frameshift	218	17	274	0	79	6	d8f56d75-51ab-4a86-a502-c86e1dcd1eff	PRAD	0.79	FALSE	0.0723404	0.0705882	0.975779	1	1	-1	80	2	36	0	WES_validated/WGS_validated
chr7	152162299	G	GTCCT	KMT2C	tumor_suppressor_gene	NM_170606.3	P3760fs	frameshift	77	94	158	6	0	26	3c975b68-4a6e-4c97-a8d1-b9a427d4957c	HNSC	0.85	TRUE	0.549708	1	1.81915	1.22e-06	1.42e-05	-1	59	100	37	1	WES_validated/WGS_validated
chr7	152162482	AC	A	KMT2C	tumor_suppressor_gene	NM_170606.3	T3698fs	frameshift	229	14	164	0	20	2	5ea18514-51ad-4844-abea-15e82f0b10c9	BRCA	0.59	FALSE	0.0576132	0.0909091	1.57792	0.630335	0.835957	-1	98	8	41	0	WES_validated/WGS_validated
chr7	152181309	GA	G	KMT2C	tumor_suppressor_gene	NM_170606.3	S2184fs	frameshift	162	16	266	0	45	12	33dc48d8-2e01-482b-944c-ac10da727ec9	OV	0.47	FALSE	0.0898876	0.210526	2.34211	0.0194294	0.0674953	-1	-1	-1	-1	-1	WES_validated/WGS_unavailable
chr7	152273753	G	GAC	KMT2C	tumor_suppressor_gene	NM_170606.3	H322fs	frameshift	158	9	183	0	16	4	d4a1ecdc-399c-4f82-aa7a-68a0c82ded3f	BRCA	0.21	FALSE	0.0538922	0.2	3.71111	0.0364496	0.111995	-1	104	17	50	0	WES_validated/WGS_validated
chr8	127738358	C	CCAG	MYC	oncogene	NM_002467.6	Q52>QQ	proteinIns	37	17	75	0	58	40	9b781072-66d8-49f2-80f7-7b020746b6e9	SARC	0.87	FALSE	0.314815	0.408163	1.29652	0.295771	0.520534	0	66	44	33	0	WES_validated/WGS_validated
chr9	21968234	CG	C	CDKN2A	tumor_suppressor_gene	NM_000077.4	P155fs	frameshift	16	2	82	0	8	132	b2285924-9813-4f46-bb8f-91a0efd8a9b6	LUAD	0.53	TRUE	0.111111	0.942857	8.48571	3.07e-14	9.85e-13	-1	0	0	9	0	WES_validated/WGS_failed_with_probability_1
chr9	21971019	GC	G	CDKN2A	tumor_suppressor_gene	NM_000077.4	L113fs	frameshift	6	5	15	0	13	975	f1a1bbf9-4751-4fb4-8a2b-19f8d4ba57bd	LUSC	0.53	TRUE	0.454545	0.986842	2.17105	8.71e-09	1.5e-07	-1	-1	-1	-1	-1	WES_validated/WGS_unavailable
chr9	21971048	AGCCGCGCCCCG	A	CDKN2A	tumor_suppressor_gene	NM_000077.4	A100_L104fs	frameshift	29	10	46	0	28	51	a091822c-447a-49a5-8c20-e329df79599c	HNSC	0.23	TRUE	0.25641	0.64557	2.51772	8.14e-05	0.000602	-1	-1	-1	-1	-1	WES_validated/WGS_unavailable
chr9	21971048	AGCCGC	A	CDKN2A	tumor_suppressor_gene	NM_000077.4	A102_L104fs	frameshift	20	10	49	0	15	425	ffb83f21-06d9-4e52-a2d0-e85c13f4037f	LUSC	0.28	TRUE	0.333333	0.965909	2.89773	9.34e-19	7.24e-17	-1	-1	-1	-1	-1	WES_validated/WGS_unavailable
chr9	21971093	CCCTCCCGGGCAGCGTCGT	GG	CDKN2A	tumor_suppressor_gene	NM_000077.4	H83_G89fs	frameshift	85	11	19	0	24	59	953359da-e535-48e6-97dc-1b4ccad6a671	PAAD	0.27	TRUE	0.114583	0.710843	6.20372	8.41e-17	4.12e-15	-1	75	11	47	0	WES_validated/WGS_validated
chr9	21971124	TGA	T	CDKN2A	tumor_suppressor_gene	NM_000077.4	L78fs	frameshift	17	3	24	0	642	282	7e0575ce-670b-4035-8a90-4d35279707b2	HNSC	0.28	FALSE	0.15	0.305195	2.03463	0.216024	0.417257	-1	2	1	41	0	WES_validated/WGS_validated
chr9	21971124	TGA	T	CDKN2A	tumor_suppressor_gene	NM_000077.4	L78fs	frameshift	22	10	22	0	16	409	286cf147-b7f7-4a05-8e41-7fbd3717ad71	BLCA	0.32	TRUE	0.3125	0.962353	3.07953	5.69e-20	4.82e-18	-1	85	37	35	0	WES_validated/WGS_validated
chr9	21971124	TGA	T	CDKN2A	tumor_suppressor_gene	NM_000077.4	L78fs	frameshift	8	9	10	0	16	228	6c28f086-6a25-40b6-93eb-bba0014acda6	GBM	0.72	TRUE	0.529412	0.934426	1.76503	2.2e-05	0.000207181	-1	31	42	40	0	WES_validated/WGS_validated
chr9	21971133	CG	C	CDKN2A	tumor_suppressor_gene	NM_000077.4	P75fs	frameshift	10	2	33	0	124	128	0232d299-4cdf-4fd7-9a5e-8d13c208b40c	LUAD	0.31	FALSE	0.166667	0.507937	3.04762	0.034612	0.107056	-1	-1	-1	-1	-1	WES_validated/WGS_unavailable
chr9	21971133	C	CG	CDKN2A	tumor_suppressor_gene	NM_000077.4	A76fs	frameshift	16	12	24	0	141	33	8f044599-3fbe-4b69-b67d-49aee9168545	HNSC	0.45	FALSE	0.428571	0.189655	0.442529	0.0121841	0.0448355	-1	44	35	40	0	WES_validated/WGS_validated
chr9	21971133	CG	C	CDKN2A	tumor_suppressor_gene	NM_000077.4	P75fs	frameshift	21	4	27	0	121	24	a091822c-447a-49a5-8c20-e329df79599c	HNSC	0.23	FALSE	0.16	0.165517	1.03448	1	1	-1	81	24	42	0	WES_validated/WGS_validated
chr9	21971144	C	CA	CDKN2A	tumor_suppressor_gene	NM_000077.4	C72fs	frameshift	75	21	17	0	14	498	21814c02-6aa5-4b98-8fd8-41ca0b04ccd2	PAAD	0.29	TRUE	0.21875	0.972656	4.44643	1.59e-61	4.94e-59	-1	72	39	55	0	WES_validated/WGS_validated
chr9	21971151	G	GT	CDKN2A	tumor_suppressor_gene	NM_000077.4	P70fs	frameshift	65	7	26	0	1	5	ca2da39a-263c-4238-9826-de7d52e63d0f	PAAD	0.23	TRUE	0.0972222	0.833333	8.57143	0.000207108	0.00133901	-1	88	8	69	0	WES_validated/WGS_validated
chr9	21971153	TC	T	CDKN2A	tumor_suppressor_gene	NM_000077.4	E69fs	frameshift	12	5	30	0	54	345	2d74e19e-9677-491f-b9ea-4874db64747a	HNSC	0.42	TRUE	0.294118	0.864662	2.93985	3.29e-07	4.44e-06	-1	-1	-1	-1	-1	WES_validated/WGS_unavailable
chr9	21971154	CCG	C	CDKN2A	tumor_suppressor_gene	NM_000077.4	A68fs	frameshift	4	3	15	0	59	940	aac385c1-42f9-4d9e-b9bf-94ca13ebc5ae	ESCA	0.49	TRUE	0.428571	0.940941	2.19553	0.000425302	0.00250605	-1	25	20	46	0	WES_validated/WGS_validated
chr9	21971155	C	CGCGCCGTG	CDKN2A	tumor_suppressor_gene	NM_000077.4	A68fs	frameshift	6	6	10	0	59	624	ada95115-275f-4229-aa00-f298a5ff931c	BLCA	0.56	TRUE	0.5	0.913616	1.82723	0.000315539	0.00193268	-1	56	35	51	0	WES_validated/WGS_validated
chr9	21971156	GC	G	CDKN2A	tumor_suppressor_gene	NM_000077.4	A68fs	frameshift	8	3	25	0	3	419	220d75ae-c94b-473a-a988-ac40c15fa219	HNSC	0.64	TRUE	0.272727	0.992891	3.6406	9.3e-13	2.47e-11	-1	56	55	47	0	WES_validated/WGS_validated
chr9	21971175	GC	G	CDKN2A	tumor_suppressor_gene	NM_000077.4	E61fs	frameshift	0	3	13	0	19	980	3df30783-c93d-4204-9703-c24c2349ba15	ESCA	0.79	FALSE	1	0.980981	0.980981	1	1	-1	-1	-1	-1	-1	WES_validated/WGS_unavailable
chr9	21971177	T	TC	CDKN2A	tumor_suppressor_gene	NM_000077.4	E61fs	frameshift	1	7	16	0	15	121	2c03e8b9-8856-43a7-853d-5ec51a6e5330	LGG	0.8	FALSE	0.875	0.889706	1.01681	1	1	-1	6	43	64	0	WES_validated/WGS_validated
chr9	21971180	G	GA	CDKN2A	tumor_suppressor_gene	NM_000077.4	A60fs	frameshift	5	2	18	0	6	280	0f5cebb3-a37b-471f-bbd3-b03ce171812a	LUSC	0.22	TRUE	0.285714	0.979021	3.42657	5.39e-07	7.06e-06	-1	52	27	45	0	WES_validated/WGS_validated
chr9	21971192	CT	C	CDKN2A	tumor_suppressor_gene	NM_000077.4	S56fs	frameshift	11	4	22	0	244	195	3aea4cf5-ade6-4747-b1d1-c431564f5fa6	HNSC	0.58	FALSE	0.266667	0.444191	1.66572	0.196703	0.389552	-1	95	36	42	0	WES_validated/WGS_validated
chr9	21971194	GCCCA	G	CDKN2A	tumor_suppressor_gene	NM_000077.4	M54_G55fs	frameshift	9	2	19	0	11	535	6a1eee8d-cf62-47e9-9322-c18633cb3ee9	BLCA	0.31	TRUE	0.181818	0.979853	5.38919	6.68e-13	1.83e-11	-1	74	36	44	0	WES_validated/WGS_validated
chr9	21971194	GC	G	CDKN2A	tumor_suppressor_gene	NM_000077.4	G55fs	frameshift	15	13	27	0	41	195	8479ec58-f5e7-4d9d-a382-2688ed93ca8e	LUSC	0.96	TRUE	0.464286	0.826271	1.77966	6.13e-05	0.000487728	-1	-1	-1	-1	-1	WES_validated/WGS_unavailable
chr9	21971199	T	TC	CDKN2A	tumor_suppressor_gene	NM_000077.4	M54fs	frameshift	9	4	14	0	7	93	f063ddbb-1668-40df-9ec2-b0a23ca2c389	LUAD	0.81	TRUE	0.307692	0.93	3.0225	1.06e-06	1.25e-05	-1	28	11	66	0	WES_validated/WGS_validated
chr9	21974721	G	GC	CDKN2A	tumor_suppressor_gene	NM_000077.4	A36fs	frameshift	88	38	108	0	3	17	34227de4-d23c-46d6-b78b-49add24a4b88	HNSC	0.39	TRUE	0.301587	0.85	2.81842	4.37e-06	4.79e-05	-1	75	23	41	0	WES_validated/WGS_validated
chr9	21974721	G	GC	CDKN2A	tumor_suppressor_gene	NM_000077.4	A36fs	frameshift	58	71	86	0	19	212	83d681f4-6c0e-45cc-a31d-0b1b31c8e073	STAD	0.42	TRUE	0.550388	0.917749	1.66746	1.54e-15	6.25e-14	-1	44	64	58	0	WES_validated/WGS_validated
chr9	21974747	CT	C	CDKN2A	tumor_suppressor_gene	NM_000077.4	E27fs	frameshift	302	14	131	0	2	4	a643d0b8-aa50-481c-9f12-f2e634d61d90	PAAD	-1	TRUE	0.0443038	0.666667	15.0476	9.72e-05	0.000702872	-1	102	10	52	0	WES_validated/WGS_validated
chr9	21974754	ACCCGACCCCGGGC	A	CDKN2A	tumor_suppressor_gene	NM_000077.4	A21_V25fs	frameshift	7	6	14	0	29	209	9559f579-5d9a-4c96-9836-8a039d394795	ESCA	0.47	TRUE	0.461538	0.878151	1.90266	0.000645706	0.00364335	-1	4	1	11	0	WES_validated/WGS_validated
chr9	21974759	AC	A	CDKN2A	tumor_suppressor_gene	NM_000077.4	G23fs	frameshift	181	57	102	0	14	98	6a0a280d-4a30-4071-afe7-de6b82a6e34c	PAAD	0.48	TRUE	0.239496	0.875	3.65351	1.27e-30	1.97e-28	-1	71	31	40	0	WES_validated/WGS_validated
chr9	21974761	CCCGGGCCGCGGCCGTGGCCA	GCCGC	CDKN2A	tumor_suppressor_gene	NM_000077.4	L16_G23fs	frameshift	8	10	45	0	0	59	9ea119ff-e5d9-49ec-b0a2-b21173c48044	LUSC	0.67	TRUE	0.555556	1	1.8	2.08e-06	2.33e-05	-1	-1	-1	-1	-1	WES_validated/WGS_unavailable
chr9	21974772	GC	G	CDKN2A	tumor_suppressor_gene	NM_000077.4	A19fs	frameshift	24	11	29	0	77	116	5845fe49-f2cc-436b-9ec8-65e775eae111	LUSC	0.43	FALSE	0.314286	0.601036	1.91239	0.00269169	0.0124223	-1	-1	-1	-1	-1	WES_validated/WGS_unavailable
chr9	21974777	GGCCA	G	CDKN2A	tumor_suppressor_gene	NM_000077.4	L16_A17fs	frameshift	170	24	28	0	0	3	2e8f90f4-aed3-43b0-985c-dfdc2581f24f	PAAD	0.29	FALSE	0.123711	1	8.08333	0.00233088	0.0110155	-1	72	17	41	0	WES_validated/WGS_validated
chr9	21974787	TCAGCCGAAGGCTCCATGCTGCT	G	CDKN2A	tumor_suppressor_gene	NM_000077.4	S7_D14fs	frameshift	16	6	71	0	0	22	b39c64bb-122d-44b3-9672-d0dc8468ca93	HNSC	0.49	TRUE	0.272727	1	3.66667	3.58e-07	4.76e-06	-1	38	37	40	0	WES_validated/WGS_validated
chr9	21974809	TC	T	CDKN2A	tumor_suppressor_gene	NM_000077.4	G6fs	frameshift	18	6	32	0	10	57	f18c47e1-516f-43f7-8d31-4e5012bd22f0	LUSC	0.33	TRUE	0.25	0.850746	3.40299	1.58e-07	2.37e-06	-1	-1	-1	-1	-1	WES_validated/WGS_unavailable
chr9	21974819	CG	C	CDKN2A	tumor_suppressor_gene	NM_000077.4	P3fs	frameshift	4	4	19	0	2	16	ce8612ab-3149-4a6a-b424-29c0c21c9b8b	LUSC	0.6	FALSE	0.5	0.888889	1.77778	0.0510185	0.1466	-1	27	46	34	0	WES_validated/WGS_validated
chr9	128608877	G	AA	SPTAN1	tumor_suppressor_gene	NM_001130438.3	E1499fs	frameshift	99	48	301	0	13	12	c871ea6b-fbd2-4e6f-ab29-f43f6e3ddcbb	BLCA	0.71	FALSE	0.326531	0.48	1.47	0.173302	0.355383	-1	39	58	36	0	WES_validated/WGS_validated
chr9	128632893	AGCGCCTTCCG	A	SPTAN1	tumor_suppressor_gene	NM_001130438.3	S2416_R2419fs	frameshift	182	15	134	0	343	162	389d1e21-5b97-4231-a3d7-71fecb918beb	BLCA	0.28	TRUE	0.0761421	0.320792	4.21307	6.05e-13	1.71e-11	-1	72	12	39	0	WES_validated/WGS_validated
chr9	134409026	GACA	G	RXRA	oncogene	NM_002957.6	N174del	proteinDel	93	8	114	0	89	15	e492d5a9-7ec5-454b-ae89-077c90f67489	BLCA	0.71	FALSE	0.0792079	0.144231	1.82091	0.184565	0.372734	0	104	8	46	0	WES_validated/WGS_validated
chr9	136496196	CAG	C	NOTCH1	tumor_suppressor_gene	NM_017617.5	P2514fs	frameshift	4	3	1	0	165	207	eb2dbb4f-66b6-4525-8323-431970f7a64e	BRCA	0.38	FALSE	0.428571	0.556452	1.29839	0.704806	0.880771	-1	62	44	56	0	WES_validated/WGS_validated
chr9	136497486	CAA	C	NOTCH1	tumor_suppressor_gene	NM_017617.5	F2084fs	frameshift	85	4	75	0	260	16	84ae73e4-3b39-4444-9bfb-3fc6057eab32	LGG	0.89	FALSE	0.0449438	0.057971	1.28986	0.792247	0.935337	-1	131	4	53	0	WES_validated/WGS_validated
chr9	136500710	GGTCT	G	NOTCH1	tumor_suppressor_gene	NM_017617.5	T1924_D1925fs	frameshift	110	39	162	0	129	7	42cc9620-98fb-4164-a3b2-28d084ca5a03	LGG	0.98	FALSE	0.261745	0.0514706	0.196644	7.45e-07	9.01e-06	-1	-1	-1	-1	-1	WES_validated/WGS_unavailable
chr9	136500807	G	GC	NOTCH1	tumor_suppressor_gene	NM_017617.5	G1893fs	frameshift	29	18	52	0	4	20	264b3066-b77b-4375-9847-adcf22dbc438	LUSC	0.33	TRUE	0.382979	0.833333	2.17593	0.000377297	0.00225169	-1	46	20	58	0	WES_validated/WGS_validated
chr9	136501880	CG	C	NOTCH1	tumor_suppressor_gene	NM_017617.5	D1835fs	frameshift	45	4	39	0	196	3	3f36cd97-eb22-47de-b447-5c96378e4a2b	LGG	0.85	FALSE	0.0816327	0.0150754	0.184673	0.0299258	0.095414	-1	80	5	39	0	WES_validated/WGS_validated
chr9	136502466	C	CG	NOTCH1	tumor_suppressor_gene	NM_017617.5	P1730fs	frameshift	9	1	18	0	25	18	9413432e-24fe-428a-b464-1a5bcdbf5f74	HNSC	0.46	FALSE	0.1	0.418605	4.18605	0.0756373	0.19725	-1	-1	-1	-1	-1	WES_validated/WGS_unavailable
chr9	136504949	GGCATCAGCACCACCACCACCAGC	G	NOTCH1	tumor_suppressor_gene	NM_017617.5	T1573_P1581fs	frameshift	29	5	15	0	160	16	9e54a27f-d0fa-4a5b-91bc-13e27fed2a3d	ESCA	0.57	FALSE	0.147059	0.0909091	0.618182	0.3477	0.581955	-1	178	53	55	0	WES_validated/WGS_validated
chr9	136505324	C	CA	NOTCH1	tumor_suppressor_gene	NM_017617.5	A1524fs	frameshift	11	3	5	0	12	4	c4060ca5-33e0-4c83-b91c-742d75059bdc	HNSC	0.21	FALSE	0.214286	0.25	1.16667	1	1	-1	70	43	47	0	WES_validated/WGS_validated
chr9	136506722	G	GA	NOTCH1	tumor_suppressor_gene	NM_017617.5	H1299fs	frameshift	21	4	11	0	3	5	ff9db03d-f81c-4079-8b05-f5a8c05b8cfe	HNSC	0.23	FALSE	0.16	0.625	3.90625	0.0201007	0.0690544	-1	3	2	59	0	WES_validated/WGS_validated
chr9	136509789	GCA	CC	NOTCH1	tumor_suppressor_gene	NM_017617.5	C971fs	frameshift	63	32	110	0	10	7	7b982d5e-3a7d-40ac-bd25-6044c62879b6	LUSC	0.44	FALSE	0.336842	0.411765	1.22243	0.586974	0.801765	-1	46	29	48	0	WES_validated/WGS_validated
chr9	136511243	CG	C	NOTCH1	tumor_suppressor_gene	NM_017617.5	P832fs	frameshift	26	32	48	0	6	17	531d1248-76ae-46a1-8f65-cdecf9bcb0d8	LUSC	0.39	FALSE	0.551724	0.73913	1.33967	0.138306	0.305126	-1	59	84	53	0	WES_validated/WGS_validated
chr9	136514643	T	TGC	NOTCH1	tumor_suppressor_gene	NM_017617.5	T692fs	frameshift	10	3	18	0	1	7	b3342767-62bc-407f-8a83-5be50e3bdc3e	HNSC	0.44	FALSE	0.230769	0.875	3.79167	0.0075188	0.0298792	-1	57	29	53	0	WES_validated/WGS_validated
chr9	136518685	GT	G	NOTCH1	tumor_suppressor_gene	NM_017617.5	N335fs	frameshift	40	4	46	0	27	4	865c624a-d52d-4c53-9904-40014cb8cce7	HNSC	0.26	FALSE	0.0909091	0.129032	1.41935	0.710652	0.885699	-1	114	19	46	0	WES_validated/WGS_validated
chr9	136544030	G	GC	NOTCH1	tumor_suppressor_gene	NM_017617.5	A45fs	frameshift	137	5	128	0	139	6	5111b51d-0c7a-4b3a-847e-200b0b3ee2c4	ESCA	0.45	FALSE	0.0352113	0.0413793	1.17517	1	1	-1	-1	-1	-1	-1	WES_validated/WGS_unavailable
chr10	8055846	AC	A	GATA3	tumor_suppressor_gene	NM_001002295.2	Y64fs	frameshift	6	1	4	0	591	180	d5be2ab3-f748-480d-954b-385cf01b4c81	BRCA	0.58	FALSE	0.142857	0.233463	1.63424	1	1	-1	60	24	45	0	WES_validated/WGS_validated
chr10	8058362	G	GC	GATA3	tumor_suppressor_gene	NM_001002295.2	G100fs	frameshift	85	1	88	0	51	7	83b41d35-69b1-4218-be1a-8821d8a6899c	BLCA	0.5	FALSE	0.0116279	0.12069	10.3793	0.00738282	0.029755	-1	122	1	47	0	WES_validated/WGS_validated
chr10	8058385	A	AC	GATA3	tumor_suppressor_gene	NM_001002295.2	T108fs	frameshift	51	1	22	0	965	16	ae8c77fe-e6c8-44d5-8265-4a38c637bbef	BRCA	0.81	FALSE	0.0192308	0.0163099	0.848114	0.58733	0.801765	-1	-1	-1	-1	-1	WES_validated/WGS_unavailable
chr10	8069538	G	GA	GATA3	tumor_suppressor_gene	NM_001002295.2	R331fs	frameshift	139	96	214	0	434	549	01f50abf-fc15-446e-9d07-edeecc545a32	BRCA	0.82	TRUE	0.408511	0.558494	1.36715	4.35e-05	0.000375273	-1	50	46	39	0	WES_validated/WGS_validated
chr10	8069538	GAGGAATGCCAA	C	GATA3	tumor_suppressor_gene	NM_001002295.2	R330_N334fs	frameshift	72	36	52	0	564	435	aba5f46a-e67a-4cd2-9c52-c0686968ff04	BRCA	0.88	FALSE	0.333333	0.435435	1.30631	0.0511876	0.146633	-1	55	31	40	0	WES_validated/WGS_validated
chr10	8069554	G	GA	GATA3	tumor_suppressor_gene	NM_001002295.2	D336fs	frameshift	76	8	66	0	667	328	d13fb44b-291b-4ea4-920c-142daa8d1989	BRCA	0.42	TRUE	0.0952381	0.329648	3.46131	1.91e-06	2.17e-05	-1	88	7	41	0	WES_validated/WGS_validated
chr10	8073739	AT	A	GATA3	tumor_suppressor_gene	NM_001002295.2	I351fs	frameshift	15	7	30	0	328	671	30047d32-0833-4aca-98d1-3b9ab7122863	BRCA	0.77	TRUE	0.318182	0.671672	2.11097	0.000961718	0.00508727	-1	53	27	50	0	WES_validated/WGS_validated
chr10	8073747	AC	A	GATA3	tumor_suppressor_gene	NM_001002295.2	P354fs	frameshift	21	5	33	0	596	347	d1fd8ed2-be13-4272-b31e-df86911db3b1	BRCA	0.64	FALSE	0.192308	0.367975	1.91347	0.0960873	0.236659	-1	53	32	38	0	WES_validated/WGS_validated
chr10	8073761	AGAAG	A	GATA3	tumor_suppressor_gene	NM_001002295.2	K358_K359fs	frameshift	16	9	42	0	524	446	1ff85ada-3cdd-4afb-b311-2c7befb52702	BRCA	0.68	FALSE	0.36	0.459794	1.27721	0.41702	0.653395	-1	53	32	53	0	WES_validated/WGS_validated
chr10	8073769	G	GGC	GATA3	tumor_suppressor_gene	NM_001002295.2	G361fs	frameshift	12	2	18	0	570	429	bb026999-0aab-4232-96d7-2c93b6c9691d	BRCA	0.5	FALSE	0.142857	0.429429	3.00601	0.0526309	0.150305	-1	64	23	32	0	WES_validated/WGS_validated
chr10	8073910	T	TC	GATA3	tumor_suppressor_gene	NM_001002295.2	S408fs	frameshift	187	1	189	0	961	14	9d166970-07c8-4ca3-9cfa-ed0049df9ecc	BRCA	0.38	FALSE	0.00531915	0.014359	2.69949	0.488159	0.719107	-1	-1	-1	-1	-1	WES_validated/WGS_unavailable
chr10	8073967	T	TC	GATA3	tumor_suppressor_gene	NM_001002295.2	S427fs	frameshift	66	12	101	0	553	446	58959e88-54e2-4558-9664-2effda7403dc	BRCA	0.54	TRUE	0.153846	0.446446	2.9019	1.63e-07	2.4e-06	-1	70	25	38	0	WES_validated/WGS_validated
chr10	8073980	TTGGACCACACCACCCCTCCAGCATGGTCA	T	GATA3	tumor_suppressor_gene	NM_001002295.2	F431_T441fs	frameshift	68	8	49	0	816	183	ed6cef77-1bd9-4e3b-b576-550a91e4253a	BRCA	0.74	FALSE	0.105263	0.183183	1.74024	0.117697	0.27394	-1	-1	-1	-1	-1	WES_validated/WGS_unavailable
chr10	8073989	ACCACCCCTCCAGCATGG	A	GATA3	tumor_suppressor_gene	NM_001002295.2	H434_V440fs	frameshift	23	11	58	0	576	423	95520295-90d3-4b4e-86b6-4bd856723315	BLCA	0.66	FALSE	0.323529	0.423423	1.30876	0.291016	0.513136	-1	76	42	59	0	WES_validated/WGS_validated
chr10	8073996	C	CT	GATA3	tumor_suppressor_gene	NM_001002295.2	S437fs	frameshift	13	2	48	0	614	213	fe2cd610-aa52-4789-ac62-7683281bb22f	BRCA	0.57	FALSE	0.133333	0.257557	1.93168	0.377935	0.614061	-1	62	18	42	0	WES_validated/WGS_validated
chr10	8074016	T	TG	GATA3	tumor_suppressor_gene	NM_001002295.2	M443fs	frameshift	39	5	20	0	741	258	b6c286c6-2755-419b-87d3-59c7feda9653	BRCA	0.43	FALSE	0.113636	0.258258	2.27267	0.0323468	0.100718	-1	71	8	42	0	WES_validated/WGS_validated
chr10	62085864	AAAAG	A	ARID5B	tumor_suppressor_gene	NM_032199.3	K455_E456fs	frameshift	8	2	10	0	5	5	65ef7168-69c6-4910-a141-d7558d0027c9	UCEC	0.82	FALSE	0.2	0.5	2.5	0.349845	0.582727	-1	56	44	32	0	WES_validated/WGS_validated
chr10	62090993	CAG	C	ARID5B	tumor_suppressor_gene	NM_032199.3	R511fs	frameshift	7	6	35	0	10	4	1f9b1b71-8753-4cd5-a585-708bea8ff1fa	UCEC	0.6	FALSE	0.461538	0.285714	0.619048	0.440071	0.676083	-1	-1	-1	-1	-1	WES_validated/WGS_unavailable
chr10	87864484	CA	C	PTEN	tumor_suppressor_gene	NM_000314.8	K6fs	frameshift	188	132	373	7	96	144	f63722c1-a0bb-4bf9-8a10-1d76a8e1a0ba	BRCA	0.41	TRUE	0.4125	0.6	1.45455	1.28e-05	0.00012587	-1	-1	-1	-1	-1	WES_validated/WGS_unavailable
chr10	87864490	GATCGTTAGCAGAAACAAAAGGAGAT	G	PTEN	tumor_suppressor_gene	NM_000314.8	I8_Y16fs	frameshift	9	6	68	0	79	65	3e9f93c0-aa79-4b4c-bd6c-b3325912362a	BRCA	0.78	FALSE	0.4	0.451389	1.12847	0.789452	0.933901	-1	-1	-1	-1	-1	WES_validated/WGS_unavailable
chr10	87864537	T	TA	PTEN	tumor_suppressor_gene	NM_000314.8	L23fs	frameshift	91	7	102	0	65	7	865a1b5a-6d94-4e06-b5a0-ac11e2221679	LUSC	0.3	FALSE	0.0714286	0.0972222	1.36111	0.581747	0.800054	-1	-1	-1	-1	-1	WES_validated/WGS_unavailable
chr10	87864543	T	TG	PTEN	tumor_suppressor_gene	NM_000314.8	L25fs	frameshift	153	2	182	0	76	3	c85f340e-584b-4f3b-b6a5-540491fc8ad2	DLBC	0.67	FALSE	0.0129032	0.0379747	2.94304	0.338862	0.573601	-1	-1	-1	-1	-1	WES_validated/WGS_unavailable
chr10	87925537	CCATTACAAGATATA	C	PTEN	tumor_suppressor_gene	NM_000314.8	H64_Y68fs	frameshift	5	7	4	0	2	23	8def73e4-83a5-4998-8f6e-f71f21c946ac	UCS	0.71	FALSE	0.583333	0.92	1.57714	0.0253987	0.0853654	-1	25	78	54	0	WES_validated/WGS_validated
chr10	87933147	CG	C	PTEN	tumor_suppressor_gene	NM_000314.8	R130fs	frameshift	134	5	221	0	161	11	7a650a2c-bc3f-4e0c-820e-4f492977107b	GBM	0.78	FALSE	0.0359712	0.0639535	1.77791	0.310967	0.540886	-1	76	5	32	0	WES_validated/WGS_validated
chr10	87952147	TG	T	PTEN	tumor_suppressor_gene	NM_000314.8	V175fs	frameshift	410	33	384	0	82	3	e33dff22-5bf1-4dd8-bed7-063cb555677c	KIRC	0.66	FALSE	0.0744921	0.0352941	0.473797	0.243299	0.452562	-1	-1	-1	-1	-1	WES_validated/WGS_unavailable
chr10	87957924	GACAAGTTCA	TTT	PTEN	tumor_suppressor_gene	NM_000314.8	D236_M239fs	frameshift	118	9	160	0	164	19	4db53b4c-2e5c-45ea-8577-4360c114e0c1	LUSC	0.41	FALSE	0.0708661	0.103825	1.46509	0.420963	0.656476	-1	62	10	41	0	WES_validated/WGS_validated
chr10	87958012	TA	T	PTEN	tumor_suppressor_gene	NM_000314.8	L265fs	frameshift	45	11	67	0	253	90	0f3e2f16-1c06-4128-af45-ee73de19ea69	STAD	0.27	FALSE	0.196429	0.262391	1.33581	0.324663	0.557677	-1	-1	-1	-1	-1	WES_validated/WGS_unavailable
chr10	87958012	TA	T	PTEN	tumor_suppressor_gene	NM_000314.8	L265fs	frameshift	95	34	181	1	81	13	ec3f3f11-75df-4fcc-ba03-f19aca907645	COAD	0.49	FALSE	0.263566	0.138298	0.524718	0.0301784	0.0958911	-1	-1	-1	-1	-1	WES_validated/WGS_unavailable
chr10	87960977	ATGTGATCAAGA	T	PTEN	tumor_suppressor_gene	NM_000314.8	L295_E299fs	frameshift	31	2	66	0	172	33	12bd70f5-2542-48cb-b296-ae9241b38f7f	LUSC	0.36	FALSE	0.0606061	0.160976	2.6561	0.185199	0.373205	-1	-1	-1	-1	-1	WES_validated/WGS_unavailable
chr10	87961041	GTACT	G	PTEN	tumor_suppressor_gene	NM_000314.8	V317_L318fs	frameshift	7	6	66	0	16	7	f04dca9e-409b-4300-b11d-12243e5d361d	BRCA	0.8	FALSE	0.461538	0.304348	0.65942	0.474065	0.709977	-1	16	20	34	0	WES_validated/WGS_validated
chr10	87961044	CTTACT	C	PTEN	tumor_suppressor_gene	NM_000314.8	L318_T319fs	frameshift	196	6	210	0	252	8	2b35c119-cdc1-49e2-8229-ca5cde9e63d0	PRAD	0.53	FALSE	0.029703	0.0307692	1.0359	1	1	-1	69	2	33	0	WES_validated/WGS_validated
chr10	87961054	CA	C	PTEN	tumor_suppressor_gene	NM_000314.8	T321fs	frameshift	56	5	135	0	116	28	bd2a14e7-bb30-48d0-a585-7fbab767d4cf	STAD	0.82	FALSE	0.0819672	0.194444	2.37222	0.0601162	0.165586	-1	72	11	32	0	WES_validated/WGS_validated
chr10	87961054	CA	C	PTEN	tumor_suppressor_gene	NM_000314.8	T321fs	frameshift	180	69	349	1	40	34	93690a96-421c-4c59-85ba-fa6dd538c721	COAD	0.61	FALSE	0.277108	0.459459	1.65805	0.00434759	0.018567	-1	58	22	41	0	WES_validated/WGS_validated
chr10	87961059	AA	C	PTEN	tumor_suppressor_gene	NM_000314.8	N323fs	frameshift	261	174	390	0	81	32	40a3ed98-3892-449c-b07e-7b7612bd997e	UCEC	0.82	FALSE	0.4	0.283186	0.707965	0.0224664	0.0768979	-1	42	28	37	0	WES_validated/WGS_validated
chr10	87961068	GAC	G	PTEN	tumor_suppressor_gene	NM_000314.8	D326fs	frameshift	9	23	22	1	21	199	2a84997d-ccee-4f46-bea2-752534f26416	BRCA	0.46	FALSE	0.71875	0.904545	1.2585	0.00600204	0.0246163	-1	40	50	45	0	WES_validated/WGS_validated
chr10	87961078	ATAAAGACAAAGCCAACCGATACTTT	A	PTEN	tumor_suppressor_gene	NM_000314.8	N329_F337fs	frameshift	100	9	123	0	21	20	6a6c1569-1045-4ed3-acdb-5c45e47614ca	KIRP	-1	TRUE	0.0825688	0.487805	5.90786	1.58e-07	2.37e-06	-1	47	5	36	0	WES_validated/WGS_validated
chr10	87965294	TGTACTTCACAAAAACA	T	PTEN	tumor_suppressor_gene	NM_000314.8	L345_T350fs	frameshift	41	3	25	0	135	72	1e1cdf72-820f-48a4-8fb6-89575d07cde9	STAD	0.32	TRUE	0.0681818	0.347826	5.10145	0.000100189	0.000717507	-1	50	8	44	0	WES_validated/WGS_validated
chr10	112951223	CGCCTCGCTCCGAAA	C	TCF7L2	tumor_suppressor_gene	NM_001146274.2	P69_S74fs	frameshift	12	1	19	0	17	9	830fd359-abd4-4c99-89e4-2d6bb9ce5637	READ	0.43	FALSE	0.0769231	0.346154	4.5	0.120306	0.277239	-1	6	2	38	0	WES_validated/WGS_validated
chr10	112951252	TCC	T	TCF7L2	tumor_suppressor_gene	NM_001146274.2	S79fs	frameshift	9	2	6	0	9	7	31bd8589-378c-40e5-8b7f-3b4c81f304be	READ	0.9	FALSE	0.181818	0.4375	2.40625	0.231121	0.43913	-1	-1	-1	-1	-1	WES_validated/WGS_unavailable
chr10	113165557	GA	G	TCF7L2	tumor_suppressor_gene	NM_001146274.2	R465fs	frameshift	129	20	76	4	13	5	567ddc8e-2b00-417d-a326-479cb02e08dd	COAD	0.23	FALSE	0.134228	0.277778	2.06944	0.152868	0.326266	-1	-1	-1	-1	-1	WES_validated/WGS_unavailable
chr10	113165557	GA	G	TCF7L2	tumor_suppressor_gene	NM_001146274.2	R465fs	frameshift	66	26	147	7	14	4	5e7074a6-5011-4dc5-950c-41365dbc6d09	COAD	0.5	FALSE	0.282609	0.222222	0.786325	0.774825	0.92128	-1	47	12	38	0	WES_validated/WGS_validated
chr10	113165557	GA	G	TCF7L2	tumor_suppressor_gene	NM_001146274.2	R465fs	frameshift	71	38	85	4	15	18	64bd568d-0509-48fe-8d0a-aef2a85d5c57	COAD	0.6	FALSE	0.348624	0.545455	1.56459	0.0662025	0.178441	-1	64	22	36	0	WES_validated/WGS_validated
chr10	113165557	GA	G	TCF7L2	tumor_suppressor_gene	NM_001146274.2	R465fs	frameshift	104	26	497	4	16	5	a18acb1d-403a-4802-8efb-9085e006f4c5	READ	0.5	FALSE	0.2	0.238095	1.19048	0.771147	0.919254	-1	52	15	20	0	WES_validated/WGS_validated
chr10	113165557	GA	G	TCF7L2	tumor_suppressor_gene	NM_001146274.2	R465fs	frameshift	59	36	82	4	4	5	c0b8c55c-b993-481d-aeea-9ebfa64ee20e	COAD	0.81	FALSE	0.378947	0.555556	1.46605	0.31217	0.541212	-1	77	51	35	0	WES_validated/WGS_validated
chr10	113165557	GA	G	TCF7L2	tumor_suppressor_gene	NM_001146274.2	R465fs	frameshift	21	65	123	6	15	42	e4be17c8-0855-432c-bb80-28bb24b62f32	COAD	0.81	FALSE	0.755814	0.736842	0.974899	0.845274	0.976365	-1	-1	-1	-1	-1	WES_validated/WGS_unavailable
chr10	113165557	GA	G	TCF7L2	tumor_suppressor_gene	NM_001146274.2	R465fs	frameshift	108	44	142	2	45	21	ec3f3f11-75df-4fcc-ba03-f19aca907645	COAD	0.49	FALSE	0.289474	0.318182	1.09917	0.747562	0.910969	-1	-1	-1	-1	-1	WES_validated/WGS_unavailable
chr11	1013580	AG	A	MUC6	tumor_suppressor_gene	NM_005961.3	L2399fs	frameshift	8	1	7	0	22	84	c656375b-6b63-4728-a126-dbd746a1f437	STAD	0.6	TRUE	0.111111	0.792453	7.13208	7.28e-05	0.000555404	-1	89	24	48	0	WES_validated/WGS_validated
chr11	1016972	GGT	G	MUC6	tumor_suppressor_gene	NM_005961.3	T1943fs	frameshift	420	45	925	0	261	48	0b1663fc-6a7e-4698-951d-a8c90fdf2411	STAD	0.73	FALSE	0.0967742	0.15534	1.60518	0.0174901	0.0614401	-1	-1	-1	-1	-1	WES_validated/WGS_unavailable
chr11	1017283	C	CGTGAGTGGGAAGT	MUC6	tumor_suppressor_gene	NM_005961.3	V1840fs	frameshift	760	72	728	0	130	13	0f344863-11cc-4fae-8386-8247dff59de4	STAD	0.62	FALSE	0.0865385	0.0909091	1.05051	0.872501	1	-1	380	29	142	0	WES_validated/WGS_validated
chr11	1017758	GGCTTGGCT	A	MUC6	tumor_suppressor_gene	NM_005961.3	S1679_A1681fs	frameshift	766	23	855	0	803	78	e9b3822b-699d-412f-abd2-df399efcce8c	STAD	0.6	TRUE	0.0291508	0.0885358	3.03716	2.81e-07	4e-06	-1	434	17	162	0	WES_validated/WGS_validated
chr11	1017914	G	GT	MUC6	tumor_suppressor_gene	NM_005961.3	H1629fs	frameshift	959	1	962	0	313	8	2a227292-c73d-45fc-ab68-cdfaf7aef9e7	STAD	0.19	TRUE	0.00104167	0.0249221	23.9252	0.000102357	0.000727438	-1	-1	-1	-1	-1	WES_validated/WGS_unavailable
chr11	1018030	TG	T	MUC6	tumor_suppressor_gene	NM_005961.3	P1590fs	frameshift	426	123	438	0	331	35	87c217d4-66f4-46ca-8244-7856ce658fd3	STAD	0.65	FALSE	0.224044	0.0956284	0.426829	2.84e-07	4e-06	-1	193	25	114	0	WES_validated/WGS_validated
chr11	1018046	GA	G	MUC6	tumor_suppressor_gene	NM_005961.3	F1585fs	frameshift	445	12	456	0	590	10	da112431-5579-4fd1-a230-9144b359b0e9	STAD	0.54	FALSE	0.0262582	0.0166667	0.634722	0.286516	0.508089	-1	198	48	20	0	WES_validated/WGS_validated
chr11	1018608	GTGTAT	G	MUC6	tumor_suppressor_gene	NM_005961.3	E1396_T1398fs	frameshift	249	5	228	0	117	12	76df6303-a635-410b-a4d9-db5dce72fcbc	STAD	0.17	FALSE	0.019685	0.0930233	4.72558	0.00242948	0.0113661	-1	117	2	40	0	WES_validated/WGS_validated
chr11	1020713	GGCTGCGGC	G	MUC6	tumor_suppressor_gene	NM_005961.3	T1201_P1204fs	frameshift	131	8	167	0	798	12	2a227292-c73d-45fc-ab68-cdfaf7aef9e7	STAD	0.19	FALSE	0.057554	0.0148148	0.257407	0.00462998	0.0196827	-1	129	11	59	0	WES_validated/WGS_validated
chr11	32396361	G	GCCGA	WT1	tumor_suppressor_gene	NM_000378.6	A370fs	frameshift	23	12	31	1	40	12	cb262c7c-2646-45e3-bea9-376e48eefe65	LAML	-1	FALSE	0.342857	0.230769	0.673077	0.328841	0.562777	-1	-1	-1	-1	-1	WES_validated/WGS_unavailable
chr11	32396363	C	CGACCG	WT1	tumor_suppressor_gene	NM_000378.6	S369fs	frameshift	99	71	182	5	26	9	11ed5289-050e-434a-a24e-79854b0d9dcc	LAML	-1	FALSE	0.417647	0.257143	0.615694	0.0883984	0.221234	-1	-1	-1	-1	-1	WES_validated/WGS_unavailable
chr11	32396363	C	CGACCGTACAAG	WT1	tumor_suppressor_gene	NM_000378.6	S369fs	frameshift	15	13	52	6	26	29	cb97312b-0bd2-4fbd-b3a6-05c5a17a0a34	LAML	0.82	FALSE	0.464286	0.527273	1.13566	0.646662	0.849143	-1	-1	-1	-1	-1	WES_validated/WGS_unavailable
chr11	32396367	C	CG	WT1	tumor_suppressor_gene	NM_000378.6	R368fs	frameshift	18	12	59	6	37	31	cb97312b-0bd2-4fbd-b3a6-05c5a17a0a34	LAML	0.82	FALSE	0.4	0.455882	1.13971	0.663086	0.857471	-1	-1	-1	-1	-1	WES_validated/WGS_unavailable
chr11	32396395	C	CA	WT1	tumor_suppressor_gene	NM_000378.6	V359fs	frameshift	53	28	70	3	15	13	75343469-9740-4b3f-83f9-82507f697fd9	LAML	-1	FALSE	0.345679	0.464286	1.34311	0.269477	0.4881	-1	-1	-1	-1	-1	WES_validated/WGS_unavailable
chr11	32396399	T	TC	WT1	tumor_suppressor_gene	NM_000378.6	R357fs	frameshift	35	43	63	4	14	14	75343469-9740-4b3f-83f9-82507f697fd9	LAML	-1	FALSE	0.551282	0.5	0.906977	0.664621	0.857471	-1	-1	-1	-1	-1	WES_validated/WGS_unavailable
chr11	32434832	CT	C	WT1	tumor_suppressor_gene	NM_000378.6	T176fs	frameshift	9	4	8	0	0	9	e4ad3f09-7e23-4a84-b8f3-3faf2db890f4	LAML	0.26	TRUE	0.307692	1	3.25	0.00167464	0.00816278	-1	-1	-1	-1	-1	WES_validated/WGS_unavailable
chr11	57815447	CG	C	CTNND1	tumor_suppressor_gene	NM_001085458.2	R919fs	frameshift	78	10	11	0	297	74	c24c54ea-4095-460d-bb53-e3629a56cd62	PAAD	-1	FALSE	0.113636	0.199461	1.75526	0.0663163	0.178441	-1	75	6	33	0	WES_validated/WGS_validated
chr11	64804620	CG	C	MEN1	tumor_suppressor_gene	NM_130799.2	R516fs	frameshift	0	12	1	0	1	45	802dbd0d-ef07-4c91-ab8d-1dd39532e947	ACC	0.93	FALSE	1	0.978261	0.978261	1	1	-1	9	48	28	0	WES_validated/WGS_validated
chr11	64804620	CG	C	MEN1	tumor_suppressor_gene	NM_130799.2	R516fs	frameshift	3	17	13	1	5	33	9a8ea017-0152-48b2-accb-d040deb1c6b6	ACC	0.89	FALSE	0.85	0.868421	1.02167	1	1	-1	20	80	51	0	WES_validated/WGS_validated
chr11	64804620	C	CG	MEN1	tumor_suppressor_gene	NM_130799.2	R516fs	frameshift	9	13	5	0	4	41	fc83ab27-929e-4ad4-ba18-abb0694f1e43	ACC	0.93	FALSE	0.590909	0.911111	1.54188	0.00618889	0.0252713	-1	6	52	31	0	WES_validated/WGS_validated
chr11	69651238	GACCTGGCTTGCACAC	CACCTGG	CCND1	oncogene	NM_053056.3	Asp282_Pro287delinsHisLeuAla	proteinDel	4	11	24	0	40	105	59398d50-45cf-4812-a24e-0c00c0199971	HNSC	0.7	FALSE	0.733333	0.724138	0.987461	1	1	0	-1	-1	-1	-1	WES_validated/WGS_unavailable
chr11	69651253	CCCA	C	CCND1	oncogene	NM_053056.3	T288del	proteinDel	17	8	19	0	62	60	d213da3a-ff1c-4fbd-8d4e-7f9e6a2318d0	UCEC	0.59	FALSE	0.32	0.491803	1.53689	0.129239	0.292753	3	64	30	140	0	WES_validated/WGS_validated
chr11	69651258	CGACGTGCGG	C	CCND1	oncogene	NM_053056.3	R291_V293del	proteinDel	18	7	26	0	12	21	5693302a-4548-4c0b-8725-0cb7c67bc4f8	UCEC	-1	FALSE	0.28	0.636364	2.27273	0.00902781	0.034588	3	5	0	4	0	WES_validated/WGS_failed_with_probability_0.193491763
chr11	69651261	CGTG	C	CCND1	oncogene	NM_053056.3	V290del	proteinDel	20	7	16	0	27	14	e0d13e2d-cf48-4b66-bfc2-88f872f67d79	UCEC	-1	FALSE	0.259259	0.341463	1.31707	0.594349	0.804272	3	58	47	37	0	WES_validated/WGS_validated
chr11	69651263	T	TGCG	CCND1	oncogene	NM_053056.3	R291>RR	proteinIns	14	13	19	0	132	125	f74da4c6-4291-46d2-abd4-7d7f6ef03b00	UCEC	0.79	FALSE	0.481481	0.486381	1.01018	1	1	3	47	46	49	0	WES_validated/WGS_validated
chr11	72237164	GC	G	INPPL1	tumor_suppressor_gene	NM_001567.4	A974fs	frameshift	5	2	72	0	20	20	a7c565fc-c711-4b63-9549-4cd74d1f57c2	UCEC	-1	FALSE	0.285714	0.5	1.75	0.422728	0.657147	-1	47	4	54	0	WES_validated/WGS_validated
chr11	72237687	GC	G	INPPL1	tumor_suppressor_gene	NM_001567.4	G1148fs	frameshift	15	2	12	0	20	10	3a4a6aff-4720-41fc-a114-85f38610ebb1	UCEC	0.68	FALSE	0.117647	0.333333	2.83333	0.165479	0.343885	-1	171	79	92	0	WES_validated/WGS_validated
chr11	72237703	GC	G	INPPL1	tumor_suppressor_gene	NM_001567.4	P1154fs	frameshift	2	1	11	0	41	20	170bbbac-940f-4e1b-b0b8-60fa36d0fa23	UCEC	0.71	FALSE	0.333333	0.327869	0.983607	1	1	-1	-1	-1	-1	-1	WES_validated/WGS_unavailable
chr11	72237703	GC	G	INPPL1	tumor_suppressor_gene	NM_001567.4	P1154fs	frameshift	1	1	7	0	31	40	3b21b47e-a15c-4b10-9702-62a14afdfb8c	UCEC	0.96	FALSE	0.5	0.56338	1.12676	1	1	-1	59	37	112	0	WES_validated/WGS_validated
chr11	72237703	GC	G	INPPL1	tumor_suppressor_gene	NM_001567.4	P1154fs	frameshift	7	1	11	0	16	15	633e6994-3e8b-4c0b-9b79-06cf4ab6f9bc	UCEC	0.75	FALSE	0.125	0.483871	3.87097	0.109142	0.262562	-1	95	55	101	0	WES_validated/WGS_validated
chr11	72237703	GC	G	INPPL1	tumor_suppressor_gene	NM_001567.4	P1154fs	frameshift	11	4	7	0	24	20	71fed998-8fac-4e6b-b38a-22c83e05e958	UCEC	0.49	FALSE	0.266667	0.454545	1.70455	0.238064	0.449569	-1	78	31	51	0	WES_validated/WGS_validated
chr11	72237703	GC	G	INPPL1	tumor_suppressor_gene	NM_001567.4	P1154fs	frameshift	4	4	2	0	9	18	62d71839-4fba-42e9-9929-8d937f0fe287	UCEC	0.69	FALSE	0.5	0.666667	1.33333	0.432723	0.669211	-1	-1	-1	-1	-1	WES_validated/WGS_unavailable
chr11	72237703	GC	G	INPPL1	tumor_suppressor_gene	NM_001567.4	P1154fs	frameshift	8	3	20	0	48	47	70b4b353-10d4-49d0-bcc1-855616d8c8cc	UCEC	0.63	FALSE	0.272727	0.494737	1.81404	0.210093	0.407494	-1	50	31	35	0	WES_validated/WGS_validated
chr11	72237703	GC	G	INPPL1	tumor_suppressor_gene	NM_001567.4	P1154fs	frameshift	9	4	21	0	161	40	a766d113-bc3f-4448-a4e5-f391fb0c0e22	UCEC	0.74	FALSE	0.307692	0.199005	0.646766	0.311402	0.540886	-1	6	3	3	0	WES_validated/WGS_validated
chr11	72237703	GC	G	INPPL1	tumor_suppressor_gene	NM_001567.4	P1154fs	frameshift	10	11	2	0	19	14	caebdce0-f954-471a-ac63-5daaa2e76d97	UCEC	0.59	FALSE	0.52381	0.424242	0.809917	0.578907	0.799647	-1	100	47	57	0	WES_validated/WGS_validated
chr11	72237703	GC	G	INPPL1	tumor_suppressor_gene	NM_001567.4	P1154fs	frameshift	4	4	11	0	84	49	d77e4dbc-b239-4742-8cb7-efd427010d13	UCEC	0.95	FALSE	0.5	0.368421	0.736842	0.474142	0.709977	-1	67	61	30	0	WES_validated/WGS_validated
chr11	72237703	GC	G	INPPL1	tumor_suppressor_gene	NM_001567.4	P1154fs	frameshift	16	4	29	0	51	23	e7e667be-9b31-4870-9c38-740098f37213	UCEC	-1	FALSE	0.2	0.310811	1.55405	0.412245	0.64831	-1	67	25	54	0	WES_validated/WGS_validated
chr11	72237703	GC	G	INPPL1	tumor_suppressor_gene	NM_001567.4	P1154fs	frameshift	5	10	13	0	39	93	e8c7195b-a26b-4d98-b1c5-0aa18385e9c8	UCEC	0.58	FALSE	0.666667	0.704545	1.05682	0.770772	0.919254	-1	44	97	53	0	WES_validated/WGS_validated
chr11	72237703	GC	G	INPPL1	tumor_suppressor_gene	NM_001567.4	P1154fs	frameshift	54	34	107	2	27	14	91a0c8cd-4f23-4569-8e5c-e5442f7af530	LIHC	0.85	FALSE	0.386364	0.341463	0.883788	0.697768	0.877718	-1	59	29	48	0	WES_validated/WGS_validated
chr11	72237703	GC	G	INPPL1	tumor_suppressor_gene	NM_001567.4	P1154fs	frameshift	15	13	16	0	146	67	a31554af-d77a-4862-8aed-4581fb2bd877	UCEC	0.88	FALSE	0.464286	0.314554	0.677501	0.135828	0.302386	-1	53	39	46	0	WES_validated/WGS_validated
chr11	72238059	CG	C	INPPL1	tumor_suppressor_gene	NM_001567.4	G1191fs	frameshift	30	12	66	0	19	19	dee43082-4aa7-4650-981c-a779e9fe7b55	UCEC	0.66	FALSE	0.285714	0.5	1.75	0.0666923	0.178935	-1	34	11	3	0	WES_validated/WGS_validated
chr11	72238125	C	CT	INPPL1	tumor_suppressor_gene	NM_001567.4	Y1213fs	frameshift	30	3	36	0	39	7	2d2a3e24-8e1c-4409-a803-fe8d475f9248	LUSC	0.29	FALSE	0.0909091	0.152174	1.67391	0.508136	0.73573	-1	64	12	55	0	WES_validated/WGS_validated
chr11	108345749	C	CA	ATM	tumor_suppressor_gene	NM_000051.3	Q2809fs	frameshift	462	1	163	0	8	3	24a40289-96fd-4c1a-a953-45a46a0a0e9d	PAAD	0.83	TRUE	0.00215983	0.272727	126.273	3.69e-05	0.000324481	-1	59	0	30	0	WES_validated/WGS_failed_with_probability_0.880233906
chr12	6591975	CATT	C	CHD4	oncogene	NM_001273.5	N1010del	proteinDel	74	4	109	0	173	33	57212fda-fd32-4328-81dc-61f167970f89	HNSC	0.57	FALSE	0.0512821	0.160194	3.12379	0.016672	0.0590178	0	117	8	35	0	WES_validated/WGS_validated
chr12	6592518	GTCC	G	CHD4	oncogene	NM_001273.5	E940del	proteinDel	117	14	56	0	111	18	1a49a131-d714-40d7-85b6-c4822c0c6264	LUSC	0.36	FALSE	0.10687	0.139535	1.30565	0.455083	0.690198	0	156	19	55	0	WES_validated/WGS_validated
chr12	12717875	CCT	C	CDKN1B	tumor_suppressor_gene	NM_004064.4	L13fs	frameshift	95	124	168	3	150	371	4c31127e-d095-4978-9dac-35153c27f6ed	LUAD	0.45	TRUE	0.56621	0.712092	1.25765	0.000160288	0.0011054	-1	46	47	59	1	WES_validated/WGS_validated
chr12	12717965	CCG	C	CDKN1B	tumor_suppressor_gene	NM_004064.4	R43fs	frameshift	57	26	18	0	458	138	0772cdbe-8b0d-452b-8df1-bd70d1306363	BRCA	0.55	FALSE	0.313253	0.231544	0.739158	0.131214	0.296505	-1	74	29	42	0	WES_validated/WGS_validated
chr12	12718247	TC	T	CDKN1B	tumor_suppressor_gene	NM_004064.4	P137fs	frameshift	11	1	27	0	188	21	3828b534-908e-4953-a3fb-07d01cf49c7d	BRCA	0.69	FALSE	0.0833333	0.100478	1.20574	1	1	-1	60	10	34	0	WES_validated/WGS_validated
chr12	14424573	A	CT	ATF7IP	tumor_suppressor_gene	NM_018179.4	I220fs	frameshift	59	75	164	0	19	39	62380447-3b94-4e7c-823a-72dd7b4ccf3a	LUAD	0.5	FALSE	0.559701	0.672414	1.20138	0.153679	0.326266	-1	29	37	42	0	WES_validated/WGS_validated
chr12	45850208	A	AC	ARID2	tumor_suppressor_gene	NM_152641.4	Q696fs	frameshift	114	8	144	0	70	5	27988b3e-cde1-4f4b-82a1-6d8ad08db8e9	STAD	0.47	FALSE	0.0655738	0.0666667	1.01667	1	1	-1	-1	-1	-1	-1	WES_validated/WGS_unavailable
chr12	45893693	AT	A	ARID2	tumor_suppressor_gene	NM_152641.4	I1779fs	frameshift	62	2	88	0	7	2	6957d45e-7ccb-457d-800d-c2a2037f4f01	LGG	0.51	FALSE	0.03125	0.222222	7.11111	0.0717345	0.188658	-1	100	7	56	0	WES_validated/WGS_validated
chr12	49024907	CTC	TT	KMT2D	tumor_suppressor_gene	NM_003482.3	M5274_R5275fs	frameshift	8	1	8	0	28	15	74b1e72d-fdd0-4d84-8858-3bb32d58ff7e	BLCA	0.4	FALSE	0.111111	0.348837	3.13953	0.244753	0.452562	-1	-1	-1	-1	-1	WES_validated/WGS_unavailable
chr12	49028905	GCTTTCCAGGGACCTCCAGGCCAAGGGCCC	G	KMT2D	tumor_suppressor_gene	NM_003482.3	G4759_K4768fs	frameshift	236	3	329	0	105	2	5fce954c-11b9-41f4-9471-4b5bdc0efa7f	HNSC	0.75	FALSE	0.0125523	0.0186916	1.4891	0.646642	0.849143	-1	153	4	59	0	WES_validated/WGS_validated
chr12	49028946	G	GT	KMT2D	tumor_suppressor_gene	NM_003482.3	T4755fs	frameshift	31	3	89	0	56	12	02bbb632-0f7f-439d-b8f0-c86a06237424	BRCA	0.23	FALSE	0.0882353	0.176471	2	0.374245	0.611267	-1	-1	-1	-1	-1	WES_validated/WGS_unavailable
chr12	49032033	T	TA	KMT2D	tumor_suppressor_gene	NM_003482.3	A4224fs	frameshift	21	3	37	0	20	4	0c890030-9bdb-4247-a3d5-a004f992f99c	BLCA	0.39	FALSE	0.125	0.166667	1.33333	1	1	-1	97	13	52	0	WES_validated/WGS_validated
chr12	49032614	GGTCTACGGTGTTTT	G	KMT2D	tumor_suppressor_gene	NM_003482.3	Q4026_D4030fs	frameshift	24	3	31	0	15	11	5860a9f1-30e8-4833-99bb-a6863e78914b	LUSC	0.47	FALSE	0.111111	0.423077	3.80769	0.013507	0.049314	-1	-1	-1	-1	-1	WES_validated/WGS_unavailable
chr12	49033239	GCCCTGGGGGCC	G	KMT2D	tumor_suppressor_gene	NM_003482.3	G3819_G3822fs	frameshift	10	6	5	0	17	11	cede5274-279d-4021-8aca-5ecc4bf94d66	BLCA	0.8	FALSE	0.375	0.392857	1.04762	1	1	-1	9	3	54	0	WES_validated/WGS_validated
chr12	49033246	GGGCC	G	KMT2D	tumor_suppressor_gene	NM_003482.3	G3819_P3820fs	frameshift	5	3	6	0	32	6	7840aea9-40c4-473e-be33-8fa0b9f332c9	BLCA	0.86	FALSE	0.375	0.157895	0.421053	0.176188	0.360508	-1	4	2	32	0	WES_validated/WGS_validated
chr12	49033860	AGC	A	KMT2D	tumor_suppressor_gene	NM_003482.3	A3615fs	frameshift	1	2	3	0	27	16	3d644eaf-82fc-4bc7-93b7-3e600e8c6511	BLCA	0.84	FALSE	0.666667	0.372093	0.55814	0.551779	0.777165	-1	-1	-1	-1	-1	WES_validated/WGS_unavailable
chr12	49037445	GGA	G	KMT2D	tumor_suppressor_gene	NM_003482.3	S3303_P3304fs	frameshift	9	2	7	0	4	3	dd3a6357-9087-44b2-9956-f981e0de6f1c	BLCA	0.36	FALSE	0.181818	0.428571	2.35714	0.32598	0.558909	-1	72	52	65	0	WES_validated/WGS_validated
chr12	49037476	CCTGGG	C	KMT2D	tumor_suppressor_gene	NM_003482.3	A3292_Q3293fs	frameshift	7	8	5	0	10	10	94a47bf8-f673-45cb-a8d3-1031317d03b3	HNSC	0.68	FALSE	0.533333	0.5	0.9375	1	1	-1	-1	-1	-1	-1	WES_validated/WGS_unavailable
chr12	49037879	GCT	G	KMT2D	tumor_suppressor_gene	NM_003482.3	S3159fs	frameshift	10	4	31	0	14	4	6ffd1b8c-6f0b-456a-9160-e0c8021e5897	BRCA	0.67	FALSE	0.285714	0.222222	0.777778	0.703493	0.880312	-1	-1	-1	-1	-1	WES_validated/WGS_unavailable
chr12	49037891	C	CT	KMT2D	tumor_suppressor_gene	NM_003482.3	K3155fs	frameshift	2	3	8	0	10	7	ebd1be2c-35ca-45c0-9aba-9baf432114c1	HNSC	0.58	FALSE	0.6	0.411765	0.686275	0.62406	0.831996	-1	77	43	41	0	WES_validated/WGS_validated
chr12	49040777	CAGGGGGGCTTTGA	C	KMT2D	tumor_suppressor_gene	NM_003482.3	F2327_L2331fs	frameshift	10	6	24	0	17	5	3d644eaf-82fc-4bc7-93b7-3e600e8c6511	BLCA	0.84	FALSE	0.375	0.227273	0.606061	0.471214	0.708725	-1	5	3	45	0	WES_validated/WGS_validated
chr12	49042765	GCGTACGGCTGC	ACGTA	KMT2D	tumor_suppressor_gene	NM_003482.3	G1916_P1920fs	frameshift	68	37	127	0	26	34	e7d49212-e9cb-4cd7-923a-bdfc82a4a150	HNSC	0.68	FALSE	0.352381	0.566667	1.60811	0.00907097	0.0346109	-1	33	43	62	0	WES_validated/WGS_validated
chr12	49050251	CCAGGGCTGGGG	C	KMT2D	tumor_suppressor_gene	NM_003482.3	A1109_L1112fs	frameshift	6	10	27	0	31	11	67c5f371-3fa9-47c5-8b15-c2dd9acc8519	BRCA	0.81	FALSE	0.625	0.261905	0.419048	0.0150617	0.0539323	-1	63	70	28	0	WES_validated/WGS_validated
chr12	49051742	TG	T	KMT2D	tumor_suppressor_gene	NM_003482.3	P647fs	frameshift	41	4	45	0	11	13	9912432e-74bc-4846-93b4-fa2bf8070bd1	CESC	-1	TRUE	0.0888889	0.541667	6.09375	6.72e-05	0.000517363	-1	-1	-1	-1	-1	WES_validated/WGS_unavailable
chr12	49054395	C	CA	KMT2D	tumor_suppressor_gene	NM_003482.3	W141fs	frameshift	3	2	9	0	10	3	f1aa75c3-13f3-4bd9-9e51-923c2f62c2f7	LUSC	0.31	FALSE	0.4	0.230769	0.576923	0.58275	0.800054	-1	47	16	38	0	WES_validated/WGS_validated
chr12	49054664	TG	T	KMT2D	tumor_suppressor_gene	NM_003482.3	P88fs	frameshift	3	3	12	0	1	7	9883c38f-87bf-4421-bfc0-1b1001f8159c	BLCA	0.68	FALSE	0.5	0.875	1.75	0.244755	0.452562	-1	46	25	43	0	WES_validated/WGS_validated
chr12	51976506	ATG	A	ACVR1B	tumor_suppressor_gene	NM_004302.5	M171fs	frameshift	135	74	285	2	19	24	ad112acb-d241-48a0-8e48-d69cdc3feba8	LUSC	0.29	FALSE	0.354067	0.55814	1.57637	0.0159567	0.0567011	-1	54	38	44	0	WES_validated/WGS_validated
chr12	56093847	AATT	A	ERBB3	oncogene	NM_001982.4	Y523del	proteinDel	32	1	28	0	16	4	3d9828ae-eb65-4d0a-8d7a-cc09e98b5e99	UCEC	0.85	FALSE	0.030303	0.2	6.6	0.0611179	0.167124	0	-1	-1	-1	-1	WES_validated/WGS_unavailable
chr12	56099924	ACTAGAC	A	ERBB3	oncogene	NM_001982.4	D1014_L1015del	proteinDel	69	27	81	0	17	4	6c526c42-2fb2-4dfa-8a3d-5651dd600ac7	UCEC	0.74	FALSE	0.28125	0.190476	0.677249	0.585684	0.801765	0	117	23	46	0	WES_validated/WGS_validated
chr12	57751583	ACCT	A	CDK4	oncogene	NM_000075.4	G48del	proteinDel	58	10	73	0	147	110	63443198-4fcf-40bd-befb-4a6920d29ca4	BLCA	0.35	TRUE	0.147059	0.428016	2.91051	9.8e-06	9.76e-05	0	80	11	54	0	WES_validated/WGS_validated
chr12	57751583	ACCT	A	CDK4	oncogene	NM_000075.4	G48del	proteinDel	49	21	92	0	146	131	d7d49895-032f-4385-8b68-ae16f8675ca7	HNSC	0.56	FALSE	0.3	0.472924	1.57641	0.0103178	0.0387332	0	79	33	35	1	WES_validated/WGS_validated
chr12	114672267	AG	A	TBX3	tumor_suppressor_gene	NM_005996.4	P582fs	frameshift	4	1	4	0	41	31	dbb2da92-99dd-400c-bc05-e87d7273656c	BRCA	0.8	FALSE	0.2	0.430556	2.15278	0.395245	0.630091	-1	64	41	59	0	WES_validated/WGS_validated
chr12	114674589	A	AGG	TBX3	tumor_suppressor_gene	NM_005996.4	L429fs	frameshift	9	2	16	0	30	27	8f34cb4c-5798-47a0-89a1-f0ee26a8ae93	BRCA	0.4	FALSE	0.181818	0.473684	2.60526	0.1002	0.245491	-1	94	16	39	0	WES_validated/WGS_validated
chr12	114674629	G	GT	TBX3	tumor_suppressor_gene	NM_005996.4	R416fs	frameshift	3	2	2	0	19	11	632984bd-dc81-42b6-b024-476cfd0bb2ae	BRCA	0.71	FALSE	0.4	0.366667	0.916667	1	1	-1	55	53	42	0	WES_validated/WGS_validated
chr12	114674657	CCCGCTGTCCCGGGG	C	TBX3	tumor_suppressor_gene	NM_005996.4	P402_G406fs	frameshift	4	1	26	0	11	15	cc348a26-ee11-47a4-8b51-de922967e175	BRCA	0.83	FALSE	0.2	0.576923	2.88462	0.171919	0.354108	-1	64	35	34	0	WES_validated/WGS_validated
chr12	114674779	CATGCTCCT	C	TBX3	tumor_suppressor_gene	NM_005996.4	E363_H365fs	frameshift	6	3	7	0	257	37	58c27028-f37c-4cf1-b134-bd9aec9bf170	PRAD	0.49	FALSE	0.333333	0.12585	0.377551	0.101683	0.248469	-1	97	14	36	0	WES_validated/WGS_validated
chr12	114677617	CT	C	TBX3	tumor_suppressor_gene	NM_005996.4	K281fs	frameshift	78	1	119	0	324	9	d6974db6-2bd3-4082-b48e-9c60f7fe3a1f	PRAD	0.6	FALSE	0.0126582	0.027027	2.13514	0.694842	0.876555	-1	81	1	43	0	WES_validated/WGS_validated
chr12	114681028	A	AC	TBX3	tumor_suppressor_gene	NM_005996.4	W170fs	frameshift	31	5	44	0	63	16	718db047-9f32-48c4-98c9-515218441bca	BRCA	0.35	FALSE	0.138889	0.202532	1.45823	0.603283	0.811642	-1	106	21	31	0	WES_validated/WGS_validated
chr12	114682997	C	CA	TBX3	tumor_suppressor_gene	NM_005996.4	L68fs	frameshift	11	3	14	0	89	32	6f6e7356-3521-4674-8eec-ad01340d4b8e	BRCA	0.53	FALSE	0.214286	0.264463	1.23416	1	1	-1	84	38	43	0	WES_validated/WGS_validated
chr13	20082953	GA	G	ZMYM2	tumor_suppressor_gene	NM_003453.5	K1248fs	frameshift	10	3	35	0	23	14	2b85b84f-e680-4b5c-93ea-3c71567227e8	UCEC	0.57	FALSE	0.230769	0.378378	1.63964	0.499226	0.731936	-1	25	16	39	0	WES_validated/WGS_validated
chr13	20987985	GCGAGTAGCTCTTGATGCG	ACGAGTAGC	LATS2	tumor_suppressor_gene	NM_014572.3	R593_P599fs	frameshift	57	140	225	0	2	13	e0df1fef-c650-4088-a974-26f712ed4f64	MESO	0.81	FALSE	0.71066	0.866667	1.21952	0.244402	0.452562	-1	26	70	35	0	WES_validated/WGS_validated
chr13	28018497	CATG	C	FLT3	oncogene	NM_004119.3	I836del	proteinDel	154	10	155	8	89	23	23e96996-f438-4e81-b3b0-d12a0c046fcd	LAML	-1	TRUE	0.0609756	0.205357	3.36786	0.000498776	0.00288422	1	-1	-1	-1	-1	WES_validated(rescued_known_hotspot)/WGS_unavailable
chr13	28018497	CATG	C	FLT3	oncogene	NM_004119.3	I836del	proteinDel	151	1	196	0	381	6	b147ea90-5643-4680-ac90-d6e8f7166792	LAML	-1	FALSE	0.00657895	0.0155039	2.35659	0.679228	0.86723	1	-1	-1	-1	-1	WES_validated/WGS_unavailable
chr13	48303949	GCCGCCGCTGCCGCCGCG	C	RB1	tumor_suppressor_gene	NM_000321.2	A13_A18fs	frameshift	1	1	0	0	1	18	c4ca7861-2fcc-4ed7-a240-bea9c43d5fb1	LUSC	0.34	FALSE	0.5	0.947368	1.89474	0.185714	0.373434	-1	64	23	41	0	WES_validated/WGS_validated
chr13	48303990	GC	G	RB1	tumor_suppressor_gene	NM_000321.2	P27fs	frameshift	1	1	0	0	2	16	a02932f3-5606-42a5-aee4-e5b9f5aa1aaa	LUSC	0.86	FALSE	0.5	0.888889	1.77778	0.284211	0.50631	-1	13	1	11	0	WES_validated/WGS_validated
chr13	48360067	CTA	C	RB1	tumor_suppressor_gene	NM_000321.2	L220fs	frameshift	45	85	116	0	9	7	456bcab3-165d-456f-94e3-f34f81a61d2e	GBM	0.86	FALSE	0.653846	0.4375	0.669118	0.105198	0.254387	-1	15	56	36	0	WES_validated/WGS_validated
chr13	48380216	TGA	T	RB1	tumor_suppressor_gene	NM_000321.2	E492fs	frameshift	8	3	15	0	108	10	9912432e-74bc-4846-93b4-fa2bf8070bd1	CESC	-1	FALSE	0.272727	0.0847458	0.310734	0.082375	0.21127	-1	83	24	25	0	WES_validated/WGS_validated
chr13	48463796	TGTAACAGCATACAAGGAT	AGTAACAG	RB1	tumor_suppressor_gene	NM_000321.2	I724_D730fs	frameshift	13	37	85	0	8	3	08d13748-0946-49a1-8eb3-5afd1deebc84	BLCA	0.77	FALSE	0.74	0.272727	0.36855	0.00539163	0.0225094	-1	13	71	45	0	WES_validated/WGS_validated
chr13	73062530	A	AGTC	KLF5	oncogene	NM_001730.5	S311>SR	proteinIns	1	1	2	0	120	90	71a32fca-d48f-4ea3-8df7-69f9dda8fa91	READ	0.74	FALSE	0.5	0.428571	0.857143	1	1	0	4	2	1	0	WES_validated/WGS_validated
chr14	21392741	GC	G	CHD8	tumor_suppressor_gene	NM_001170629.2	S2179fs	frameshift	35	2	47	0	234	3	8628f1b2-3763-4ba9-a375-083874bb18f2	OV	0.93	FALSE	0.0540541	0.0126582	0.234177	0.136415	0.302386	-1	80	1	50	0	WES_validated/WGS_validated
chr14	21400999	GGTCATCATCTTTCAGA	G	CHD8	tumor_suppressor_gene	NM_001170629.2	T1410_D1415fs	frameshift	144	9	153	0	123	2	b63391a0-73f8-4544-9e94-f6529245ca2a	BRCA	0.77	FALSE	0.0588235	0.016	0.272	0.118686	0.274868	-1	98	5	36	0	WES_validated/WGS_validated
chr14	21431267	TGGCTCTTGGAGACTTG	T	CHD8	tumor_suppressor_gene	NM_001170629.2	Q121_Q126fs	frameshift	214	42	134	0	150	8	6644fd4e-d2fe-4785-a73c-0f36fcc740e2	BRCA	-1	FALSE	0.164062	0.0506329	0.30862	0.000524516	0.00301435	-1	115	21	46	0	WES_validated/WGS_validated
chr14	21431305	C	CGA	CHD8	tumor_suppressor_gene	NM_001170629.2	S113fs	frameshift	4	2	8	0	27	7	38cfe5af-02e4-4271-8978-8e2566d3dca7	HNSC	0.26	FALSE	0.333333	0.205882	0.617647	0.601603	0.810553	-1	-1	-1	-1	-1	WES_validated/WGS_unavailable
chr14	21431317	G	GAC	CHD8	tumor_suppressor_gene	NM_001170629.2	V109fs	frameshift	67	27	85	0	10	2	0c5ae0f7-b2ac-4b1b-aabb-83994ebb9326	MESO	0.52	FALSE	0.287234	0.166667	0.580247	0.505067	0.733152	-1	93	36	29	0	WES_validated/WGS_validated
chr14	22981453	CGGCG	C	AJUBA	tumor_suppressor_gene	NM_032876.6	C270_A271fs	frameshift	5	8	23	1	1	18	55838e1f-07e8-49ca-89d6-46216babc6f7	HNSC	0.31	FALSE	0.615385	0.947368	1.53947	0.028878	0.0938691	-1	4	4	57	0	WES_validated/WGS_validated
chr14	22981477	C	CA	AJUBA	tumor_suppressor_gene	NM_032876.6	V264fs	frameshift	15	3	17	0	6	23	7e3b90c1-8772-4e12-8050-a156558beb82	HNSC	0.49	TRUE	0.166667	0.793103	4.75862	4.71e-05	0.000398362	-1	3	1	2	0	WES_validated/WGS_validated
chr14	22981477	C	CAG	AJUBA	tumor_suppressor_gene	NM_032876.6	V264fs	frameshift	10	16	8	0	8	10	ccd672df-44d4-421f-8727-0a05e513b6c8	HNSC	0.61	FALSE	0.615385	0.555556	0.902778	0.761175	0.91628	-1	67	73	51	0	WES_validated/WGS_validated
chr14	22981481	GT	G	AJUBA	tumor_suppressor_gene	NM_032876.6	H262fs	frameshift	11	5	13	0	22	15	f027d254-ec01-4882-a8a7-964ae90b7d49	BLCA	0.56	FALSE	0.3125	0.405405	1.2973	0.758318	0.91628	-1	4	1	67	0	WES_validated/WGS_validated
chr14	22981568	CG	C	AJUBA	tumor_suppressor_gene	NM_032876.6	P233fs	frameshift	3	1	5	0	6	16	677c9d22-e518-43ab-9668-a606c35a6eeb	HNSC	0.75	FALSE	0.25	0.727273	2.90909	0.103946	0.253336	-1	38	44	45	0	WES_validated/WGS_validated
chr14	22981724	CG	T	AJUBA	tumor_suppressor_gene	NM_032876.6	P181fs	frameshift	0	1	1	0	7	26	3ee863da-7991-414f-82d8-2b6502d4c061	HNSC	0.47	FALSE	1	0.787879	0.787879	1	1	-1	0	2	66	0	WES_validated/WGS_validated
chr14	22981795	A	AGG	AJUBA	tumor_suppressor_gene	NM_032876.6	C158fs	frameshift	1	1	4	0	5	15	3e49a2b8-9b2c-4d15-9773-24df8b4ab2fd	HNSC	0.21	FALSE	0.5	0.75	1.5	0.480519	0.714638	-1	60	23	56	0	WES_validated/WGS_validated
chr14	22981841	C	CAG	AJUBA	tumor_suppressor_gene	NM_032876.6	L142fs	frameshift	2	3	2	0	4	33	899f8d52-4c3a-4371-90eb-1f106001eddc	BLCA	0.62	FALSE	0.6	0.891892	1.48649	0.141355	0.30921	-1	3	2	39	0	WES_validated/WGS_validated
chr14	22981916	GGCCGGGGCCGTGGGCTCCA	AGCGGG	AJUBA	tumor_suppressor_gene	NM_032876.6	L111_A117fs	frameshift	1	2	10	0	0	106	31e58fac-3ac3-4eeb-82d6-3f2b5cb8a60d	HNSC	0.73	FALSE	0.666667	1	1.5	0.0275229	0.0910378	-1	26	42	46	0	WES_validated/WGS_validated
chr14	22981967	AG	A	AJUBA	tumor_suppressor_gene	NM_032876.6	P100fs	frameshift	16	5	12	0	7	8	e8ac39e6-377a-412c-b18d-f6c4fc654ec6	HNSC	0.63	FALSE	0.238095	0.533333	2.24	0.0895099	0.222818	-1	87	23	42	0	WES_validated/WGS_validated
chr14	37591566	CAT	C	FOXA1	tumor_suppressor_gene	NM_004496.5	M406fs	frameshift	16	1	40	0	117	28	087a7f70-2fa8-4a16-b130-4df10a70c662	BLCA	0.73	FALSE	0.0588235	0.193103	3.28276	0.312826	0.541341	-1	8	0	10	0	WES_validated/WGS_failed_with_probability_0.615699062
chr14	37591630	TGGGACTCGTGGGGTGCCA	C	FOXA1	oncogene	NM_004496.5	L379_Q385>W	proteinDel	19	9	18	0	638	361	f8a42feb-fbc9-4a13-bad5-1dcefca2a9bf	PRAD	0.8	FALSE	0.321429	0.361361	1.12424	0.842156	0.975184	0	57	38	59	0	WES_validated/WGS_validated
chr14	37591954	CCGCCGCCGGCCCCCGGCTGCTTCTCGCACTTGA	C	FOXA1	oncogene	NM_004496.5	Phe266_Gly278delinsTrpGlyGlySerGlySer	proteinDel	9	6	11	0	164	114	d17b1955-0565-46c1-a5a7-ecd41ac0286a	PRAD	0.74	FALSE	0.4	0.410072	1.02518	1	1	0	217	46	96	0	WES_validated/WGS_validated
chr14	37591954	CCGCCGCCGGCCCCCGGCTGCTTCTCGCACTTGA	C	FOXA1	oncogene	NM_004496.5	F266_G277>W	proteinDel	10	1	13	0	376	304	d17b1955-0565-46c1-a5a7-ecd41ac0286a	PRAD	0.74	FALSE	0.0909091	0.447059	4.91765	0.0275754	0.0910378	0	217	46	96	0	WES_validated/WGS_validated
chr14	37591963	G	GC	FOXA1	tumor_suppressor_gene	NM_004496.5	A274fs	frameshift	2	13	7	0	51	141	353c5fcc-9c6a-4ac6-99dc-fb4573b2ae6c	BLCA	0.8	FALSE	0.866667	0.734375	0.847356	0.363686	0.597163	-1	80	52	95	0	WES_validated/WGS_validated
chr14	37591987	AAGC	A	FOXA1	oncogene	NM_004496.5	R265_F266>L	proteinDel	13	1	10	0	44	29	da286247-e8bb-4941-a2af-2453fe61cd02	BRCA	0.36	FALSE	0.0714286	0.39726	5.56164	0.0285947	0.0934095	0	85	18	31	0	WES_validated/WGS_validated
chr14	37592001	GCGC	G	FOXA1	oncogene	NM_004496.5	L260_R261>F	proteinDel	13	9	20	0	452	522	717c0fd3-527b-4d5e-a9ab-0f141fcc84e8	PRAD	0.66	FALSE	0.409091	0.535934	1.31006	0.282569	0.505205	0	-1	-1	-1	-1	WES_validated/WGS_unavailable
chr14	37592016	GTTCTCGAACATGTTGCCGGAGTCC	G	FOXA1	oncogene	NM_004496.5	D249_N256del	proteinDel	31	1	29	0	709	212	73f875cb-bcfc-43ba-ab97-4e94caf836d4	PRAD	0.29	FALSE	0.03125	0.230185	7.36591	0.00434334	0.018567	0	59	7	41	0	WES_validated/WGS_validated
chr14	37592020	TCGAACATGTTGC	T	FOXA1	oncogene	NM_004496.5	G251_F254del	proteinDel	19	1	67	0	161	18	e27bc39b-54f1-47b5-ac8f-3245dce690f4	PRAD	-1	FALSE	0.05	0.100559	2.01117	0.699535	0.877718	0	93	8	38	0	WES_validated/WGS_validated
chr14	37592020	TCGAACATGTTGC	T	FOXA1	oncogene	NM_004496.5	G251_F254del	proteinDel	36	2	39	0	661	228	b424b73a-2dfa-473f-ab56-ab382cd1cdef	PRAD	0.48	FALSE	0.0526316	0.256468	4.87289	0.00322325	0.0144427	0	7	1	24	0	WES_validated/WGS_validated
chr14	37592020	TCGAACATGTTGC	T	FOXA1	oncogene	NM_004496.5	G251_F254del	proteinDel	33	4	51	0	420	140	6433f001-db5c-476b-83c7-23f4c5397ae9	PRAD	0.24	FALSE	0.108108	0.25	2.3125	0.0715954	0.188658	0	-1	-1	-1	-1	WES_validated/WGS_unavailable
chr14	37592024	A	ACTT	FOXA1	oncogene	NM_004496.5	M253>MK	proteinIns	42	3	49	0	675	93	0af98331-9305-41e9-af55-30390016d65e	PRAD	0.24	FALSE	0.0666667	0.121094	1.81641	0.347389	0.581955	0	89	10	38	0	WES_validated/WGS_validated
chr14	37592026	ATGTTGCCGGAGT	A	FOXA1	oncogene	NM_004496.5	D249_M253>V	proteinDel	21	4	38	0	727	103	d7763066-fb06-4519-9188-5de7dd12fdb7	PRAD	0.45	FALSE	0.16	0.124096	0.775602	0.540902	0.768862	0	78	5	34	0	WES_validated/WGS_validated
chr14	37592030	TGCCGGAGTC	T	FOXA1	oncogene	NM_004496.5	D249_G251del	proteinDel	34	2	51	0	403	51	6433f001-db5c-476b-83c7-23f4c5397ae9	PRAD	0.24	FALSE	0.0555556	0.112335	2.02203	0.407792	0.645671	0	72	5	33	0	WES_validated/WGS_validated
chr14	37592311	T	TCGC	FOXA1	oncogene	NM_004496.5	G157>GG	proteinIns	17	12	35	0	158	105	f5319fd5-beae-4ca8-8f42-45fca5e6a2d2	PRAD	0.94	FALSE	0.413793	0.39924	0.964829	1	1	0	45	38	36	0	WES_validated/WGS_validated
chr14	37592419	G	GC	FOXA1	tumor_suppressor_gene	NM_004496.5	A122fs	frameshift	15	3	15	0	48	10	72fe54b5-c1c8-468a-954a-09992429512a	BLCA	0.93	FALSE	0.166667	0.172414	1.03448	1	1	-1	87	7	62	0	WES_validated/WGS_validated
chr14	68789748	GCCCCATGCTAGGGGCAAA	AG	ZFP36L1	tumor_suppressor_gene	NM_004926.4	F262_L268fs	frameshift	138	90	206	0	422	248	917961e2-78ad-4182-9cdb-5efb09808111	BLCA	0.96	FALSE	0.394737	0.370149	0.937711	0.527128	0.75501	-1	66	43	51	0	WES_validated/WGS_validated
chr14	68789826	T	TA	ZFP36L1	tumor_suppressor_gene	NM_004926.4	T242fs	frameshift	249	16	276	0	68	48	140b83db-badd-4b8d-b0f5-0f8c8060a228	BLCA	0.2	TRUE	0.0603774	0.413793	6.85345	4.95e-16	2.19e-14	-1	95	7	49	0	WES_validated/WGS_validated
chr14	68789826	T	TAG	ZFP36L1	tumor_suppressor_gene	NM_004926.4	T242fs	frameshift	123	12	156	0	36	16	42bcf1a7-2f3a-4ed8-a41d-cdd67e65b928	BLCA	0.26	TRUE	0.0888889	0.307692	3.46154	0.000419093	0.00248519	-1	103	15	66	0	WES_validated/WGS_validated
chr15	41729184	TC	T	MGA	tumor_suppressor_gene	NM_001164273.1	P1227fs	frameshift	29	19	35	5	28	19	7994d0a6-cef5-4391-a121-5a0853a34fa7	LAML	-1	FALSE	0.395833	0.404255	1.02128	1	1	-1	-1	-1	-1	-1	WES_validated/WGS_unavailable
chr15	41750138	TCTGAAGGGCC	T	MGA	tumor_suppressor_gene	NM_001164273.1	L2178_P2181fs	frameshift	57	4	65	0	72	13	33283111-9a2f-4d5e-92a5-3435846404f7	PRAD	0.59	FALSE	0.0655738	0.152941	2.33235	0.122894	0.281115	-1	6	1	48	0	WES_validated/WGS_validated
chr15	41754442	CTG	C	MGA	tumor_suppressor_gene	NM_001164273.1	C2339fs	frameshift	0	6	7	0	59	24	83ae044d-2975-478c-902c-776858c2ba3a	LAML	0.66	FALSE	1	0.289157	0.289157	0.0010218	0.00529096	-1	-1	-1	-1	-1	WES_validated/WGS_unavailable
chr15	44711582	ACT	A	B2M	tumor_suppressor_gene	NM_004048.3	L13fs	frameshift	60	33	107	0	784	67	3d1f4059-2220-45b4-a4d2-b14f76cec96a	LUSC	0.48	FALSE	0.354839	0.0787309	0.221878	4.94e-12	1.24e-10	-1	49	30	97	1	WES_validated/WGS_validated
chr15	44711582	ACT	A	B2M	tumor_suppressor_gene	NM_004048.3	L13fs	frameshift	7	139	47	2	602	148	fb504e55-1859-48ee-aec7-a3fcb082785e	ACC	0.96	FALSE	0.952055	0.197333	0.207271	1.79e-71	8.35e-69	-1	8	116	42	0	WES_validated/WGS_validated
chr15	44711587	CTCT	TC	B2M	tumor_suppressor_gene	NM_004048.3	S14_L15fs	frameshift	40	2	87	0	859	5	362000e4-cf7c-48fc-93cc-8f5994b442ea	LUAD	0.42	FALSE	0.047619	0.00578704	0.121528	0.0380062	0.114883	-1	36	3	41	0	WES_validated/WGS_validated
chr15	57263167	CAAAG	C	TCF12	tumor_suppressor_gene	NM_207036.2	K547_E548fs	frameshift	22	15	34	0	433	39	e7fdf164-a85d-4ff5-9676-d2215ca35403	LGG	0.65	FALSE	0.405405	0.0826271	0.203814	5.85e-07	7.47e-06	-1	51	37	37	0	WES_validated/WGS_validated
chr15	57263167	CAAAG	C	TCF12	tumor_suppressor_gene	NM_207036.2	K547_E548fs	frameshift	27	21	45	0	863	80	f18dab99-26b0-4727-89a9-7f16bd382356	LGG	0.87	FALSE	0.4375	0.0848356	0.19391	4.69e-10	9.93e-09	-1	40	27	32	0	WES_validated/WGS_validated
chr15	57282562	C	CTTGG	TCF12	tumor_suppressor_gene	NM_207036.2	T699fs	frameshift	179	2	199	0	910	12	ea7f3ed6-e44b-49a1-8b5c-ce35539e7bdf	LGG	0.66	FALSE	0.0110497	0.0130152	1.17787	1	1	-1	115	1	28	0	WES_validated/WGS_validated
chr15	75413033	TGG	T	SIN3A	tumor_suppressor_gene	NM_001145358.2	P162fs	frameshift	54	7	78	0	20	5	fe714ac0-f874-426a-924b-a2980232b5f7	LUAD	0.39	FALSE	0.114754	0.2	1.74286	0.318576	0.549249	-1	96	21	56	0	WES_validated/WGS_validated
chr16	293715	AG	A	AXIN1	tumor_suppressor_gene	NM_003502.4	S653fs	frameshift	118	2	100	0	141	4	9a76bd98-1d2b-4d0f-9772-883520ff6210	HNSC	0.31	FALSE	0.0166667	0.0275862	1.65517	0.6924	0.876555	-1	11	0	51	0	WES_validated/WGS_failed_with_probability_0.831205431
chr16	2084683	C	CA	TSC2	tumor_suppressor_gene	NM_000548.5	N1488fs	frameshift	438	281	848	2	8	18	491a3734-dcb8-4779-b098-0b5567f13f87	LIHC	0.42	FALSE	0.390821	0.692308	1.77142	0.00349354	0.0154146	-1	60	37	50	0	WES_validated/WGS_validated
chr16	2086369	CAT	C	TSC2	tumor_suppressor_gene	NM_000548.5	I1614fs	frameshift	54	6	52	0	31	9	c4e6527a-8f58-4f6b-93b1-04abb5680ed0	LIHC	1	FALSE	0.1	0.225	2.25	0.0964612	0.236953	-1	100	30	50	0	WES_validated/WGS_validated
chr16	2088457	AGCCGCCTACTCCA	C	TSC2	tumor_suppressor_gene	NM_000548.5	E1757_N1762fs	frameshift	5	3	25	0	17	67	26d93d77-ab66-45aa-a162-98d091221afb	LIHC	0.8	FALSE	0.375	0.797619	2.12698	0.0175543	0.0614401	-1	27	35	59	0	WES_validated/WGS_validated
chr16	3728449	GC	G	CREBBP	tumor_suppressor_gene	NM_004380.3	Q2199fs	frameshift	35	14	42	1	89	12	c606918f-e8c0-4019-ad6f-47d5cd7615c4	PRAD	0.59	FALSE	0.285714	0.118812	0.415842	0.0198696	0.0685132	-1	66	18	47	0	WES_validated/WGS_validated
chr16	3729055	CG	C	CREBBP	tumor_suppressor_gene	NM_004380.3	P1997fs	frameshift	27	23	31	2	19	18	dc87a809-95de-4eb7-a1c2-2650475f2d7e	DLBC	0.72	FALSE	0.46	0.486486	1.05758	0.831161	0.96365	-1	-1	-1	-1	-1	WES_validated/WGS_unavailable
chr16	3729209	TG	T	CREBBP	tumor_suppressor_gene	NM_004380.3	P1946fs	frameshift	10	1	19	0	8	12	69baba9f-19c2-4947-95dc-0dd3412929ba	CESC	0.46	FALSE	0.0909091	0.6	6.6	0.00844785	0.0327706	-1	-1	-1	-1	-1	WES_validated/WGS_unavailable
chr16	3769194	TG	T	CREBBP	tumor_suppressor_gene	NM_004380.3	S1013fs	frameshift	34	7	17	0	213	36	9ebda267-a475-408a-a512-cd3761de83b4	SARC	0.7	FALSE	0.170732	0.144578	0.846816	0.638757	0.843522	-1	130	31	29	0	WES_validated/WGS_validated
chr16	3879837	C	CT	CREBBP	tumor_suppressor_gene	NM_004380.3	S27fs	frameshift	38	4	25	0	7	7	5df620fa-44d9-4361-91d0-f242e3e5e595	BLCA	0.47	FALSE	0.0952381	0.5	5.25	0.00282322	0.0128844	-1	69	13	33	0	WES_validated/WGS_validated
chr16	67029761	AG	A	CBFB	tumor_suppressor_gene	NM_022845.3	E38fs	frameshift	2	1	10	0	15	7	491d5ebb-e9ab-4b17-acb8-630ff9fef0f2	BRCA	0.72	FALSE	0.333333	0.318182	0.954545	1	1	-1	24	33	37	0	WES_validated/WGS_validated
chr16	67029791	GC	G	CBFB	tumor_suppressor_gene	NM_022845.3	C48fs	frameshift	0	3	8	0	27	19	5cdae21d-eee5-478f-932a-0f51fcf5f031	BRCA	0.8	FALSE	1	0.413043	0.413043	0.0835866	0.213203	-1	14	73	41	0	WES_validated/WGS_validated
chr16	67082266	CG	C	CBFB	tumor_suppressor_gene	NM_022845.3	E152fs	frameshift	15	19	56	0	60	83	1026e0bf-5640-4fa5-b65f-4f11e8e76b18	BRCA	0.76	FALSE	0.558824	0.58042	1.03865	0.848586	0.978976	-1	18	41	46	0	WES_validated/WGS_validated
chr16	67082267	G	GA	CBFB	tumor_suppressor_gene	NM_022845.3	E152fs	frameshift	131	106	223	3	51	17	d5fe3b27-c6a6-4a35-a173-3f7b73c2ed14	LAML	-1	FALSE	0.447257	0.25	0.558962	0.00330784	0.0147349	-1	-1	-1	-1	-1	WES_validated/WGS_unavailable
chr16	67611283	G	GA	CTCF	tumor_suppressor_gene	NM_006565.4	E151fs	frameshift	6	5	17	0	9	4	d1c65e6a-098e-4c10-9183-c303ba66015a	UCEC	0.93	FALSE	0.454545	0.307692	0.676923	0.675175	0.863445	-1	-1	-1	-1	-1	WES_validated/WGS_unavailable
chr16	68808783	GA	G	CDH1	tumor_suppressor_gene	NM_004360.5	E208fs	frameshift	5	27	41	2	5	20	14d1d84e-99e1-41ad-8892-3b4da3d4f948	BRCA	0.82	FALSE	0.84375	0.8	0.948148	0.734541	0.899813	-1	-1	-1	-1	-1	WES_validated/WGS_unavailable
chr16	68810244	A	AATGG	CDH1	tumor_suppressor_gene	NM_004360.5	E247fs	frameshift	125	17	114	0	2	3	c2a742fe-3e8b-4210-85a6-7191a1123609	BRCA	0.18	FALSE	0.119718	0.6	5.01176	0.0182615	0.0636759	-1	69	12	37	0	WES_validated/WGS_validated
chr16	68811854	C	CGAGA	CDH1	tumor_suppressor_gene	NM_004360.5	R335fs	frameshift	52	5	35	0	0	6	376ffe63-efd7-42af-90e1-261255b28bb7	BRCA	0.23	TRUE	0.0877193	1	11.4	6.8e-06	6.96e-05	-1	82	6	47	0	WES_validated/WGS_validated
chr16	68822063	G	GC	CDH1	tumor_suppressor_gene	NM_004360.5	A592fs	frameshift	11	41	48	0	1	11	28911b97-42bf-4189-9961-522fc0aeebc6	BRCA	0.94	FALSE	0.788462	0.916667	1.1626	0.435628	0.671473	-1	15	47	38	0	WES_validated/WGS_validated
chr16	68822077	ACCTCGAACTATATTCTTCTGTGAGAGGAATC	GGAATT	CDH1	tumor_suppressor_gene	NM_004360.5	E596_P607fs	frameshift	50	29	89	0	8	26	ec0155ab-1b14-498d-8fa9-9f63e3ccb990	BRCA	0.44	TRUE	0.367089	0.764706	2.08316	0.000170846	0.00115363	-1	47	32	61	0	WES_validated/WGS_validated
chr16	68823594	T	TG	CDH1	tumor_suppressor_gene	NM_004360.5	L711fs	frameshift	105	5	84	0	497	49	a2934508-3daf-49e2-b14f-ed9b7693f96f	BRCA	0.88	FALSE	0.0454545	0.0897436	1.97436	0.180626	0.365572	-1	84	3	31	0	WES_validated/WGS_validated
chr16	72788050	GA	G	ZFHX3	tumor_suppressor_gene	NM_006885.4	S3409fs	frameshift	10	14	21	0	11	7	41dcafa0-b196-46dd-ab07-58cb747c9ebc	UCEC	-1	FALSE	0.583333	0.388889	0.666667	0.349887	0.582727	-1	-1	-1	-1	-1	WES_validated/WGS_unavailable
chr16	72795146	G	GA	ZFHX3	tumor_suppressor_gene	NM_006885.4	L2512fs	frameshift	260	6	279	0	16	2	6397c4a1-0a29-4c2c-b8cb-ce73af93dd0b	UCEC	0.7	FALSE	0.0225564	0.111111	4.92593	0.0847065	0.214882	-1	61	1	39	0	WES_validated/WGS_validated
chr16	72797003	CCT	C	ZFHX3	tumor_suppressor_gene	NM_006885.4	R1893fs	frameshift	26	25	56	0	2	5	397b2672-d014-4b57-88dd-17e66ff8be4d	UCEC	-1	FALSE	0.490196	0.714286	1.45714	0.424935	0.659357	-1	-1	-1	-1	-1	WES_validated/WGS_unavailable
chr16	72797003	CCT	C	ZFHX3	tumor_suppressor_gene	NM_006885.4	R1893fs	frameshift	40	17	54	0	3	6	41dcafa0-b196-46dd-ab07-58cb747c9ebc	UCEC	-1	FALSE	0.298246	0.666667	2.23529	0.0554649	0.156478	-1	42	40	36	0	WES_validated/WGS_validated
chr16	72797003	CCT	C	ZFHX3	tumor_suppressor_gene	NM_006885.4	R1893fs	frameshift	298	98	246	0	6	5	4485cc98-5d58-4eb4-8325-7d1a617b6461	UCEC	0.56	FALSE	0.247475	0.454545	1.83673	0.155131	0.328138	-1	61	23	26	0	WES_validated/WGS_validated
chr17	7313411	AGCATAGGGCTGTGGCT	C	GPS2	tumor_suppressor_gene	NM_004489.5	Q226_A231fs	frameshift	15	75	3	0	71	322	fef1696c-a8f4-4db6-8615-e486522baaaa	OV	-1	FALSE	0.833333	0.819338	0.983206	0.87877	1	-1	5	45	42	0	WES_validated/WGS_validated
chr17	7669609	TCA	T	TP53	tumor_suppressor_gene	NM_000546.5	*394fs	frameshift	163	6	201	0	103	13	49587564-e30f-4f1c-b7b3-fc0989bb1a0a	STAD	-1	FALSE	0.035503	0.112069	3.15661	0.0147396	0.0529828	-1	139	7	58	0	WES_validated/WGS_validated
chr17	7669672	CT	C	TP53	tumor_suppressor_gene	NM_000546.5	K373fs	frameshift	112	60	189	1	39	131	3be0bc1d-d81f-4769-b650-8cc8858e45db	KIRC	0.71	TRUE	0.348837	0.770588	2.20902	2.08e-15	7.74e-14	-1	-1	-1	-1	-1	WES_validated/WGS_unavailable
chr17	7670650	GGCATCCTTGAGTTCCAAGGCCTCATTCA	G	TP53	tumor_suppressor_gene	NM_000546.5	L344_A353fs	frameshift	23	4	35	0	13	47	50b2c647-aecd-4c81-af22-0d8116593552	LUAD	0.35	TRUE	0.148148	0.783333	5.2875	3.58e-08	5.75e-07	-1	58	16	59	0	WES_validated/WGS_validated
chr17	7670683	TCGGAA	T	TP53	tumor_suppressor_gene	NM_000546.5	F341_R342fs	frameshift	36	4	35	0	25	14	df37eed0-ea63-485d-a831-28d3061852bd	HNSC	0.29	FALSE	0.1	0.358974	3.58974	0.00754202	0.0298792	-1	84	16	54	0	WES_validated/WGS_validated
chr17	7670711	CG	C	TP53	tumor_suppressor_gene	NM_000546.5	R333fs	frameshift	6	7	29	0	14	19	dd63d0fd-e24b-40a5-88c5-7d3d4106631e	LUAD	0.55	FALSE	0.538462	0.575758	1.06926	1	1	-1	33	30	45	0	WES_validated/WGS_validated
chr17	7673537	GA	G	TP53	tumor_suppressor_gene	NM_000546.5	L330fs	frameshift	65	3	75	0	66	5	408c5d54-7888-4955-8386-bf8819b48a6c	HNSC	0.22	FALSE	0.0441176	0.0704225	1.59624	0.718916	0.892238	-1	87	12	20	0	WES_validated/WGS_validated
chr17	7673725	G	GCT	TP53	tumor_suppressor_gene	NM_000546.5	L299fs	frameshift	52	29	67	11	47	8	0824b246-9fa2-4a8b-ad4c-1ffc7731bf7d	ACC	-1	FALSE	0.358025	0.145455	0.40627	0.00638285	0.0259495	-1	53	22	35	6	WES_validated/WGS_validated
chr17	7673773	GC	G	TP53	tumor_suppressor_gene	NM_000546.5	R282fs	frameshift	62	48	90	0	22	28	291b069c-9dde-4e1e-8430-85146bc94338	HNSC	0.51	FALSE	0.436364	0.56	1.28333	0.173089	0.355383	-1	54	34	42	0	WES_validated/WGS_validated
chr17	7673774	CCGGTCTCTCCCAGGACAGGCA	C	TP53	oncogene	NM_000546.5	C275_R282>W	proteinDel	8	30	30	0	13	48	01a13aba-74a4-4895-a5ad-e5119925c202	LGG	0.6	FALSE	0.789474	0.786885	0.996721	1	1	3	30	74	37	0	WES_validated/WGS_validated
chr17	7673801	AC	A	TP53	tumor_suppressor_gene	NM_000546.5	R273fs	frameshift	12	33	79	0	14	105	0de910b1-edaf-47e4-a265-727ee12ac1c3	OV	-1	FALSE	0.733333	0.882353	1.20321	0.0296652	0.0952355	-1	7	39	22	0	WES_validated/WGS_validated
chr17	7673818	TCCGTC	T	TP53	tumor_suppressor_gene	NM_000546.5	G266_R267fs	frameshift	16	4	31	0	40	6	7e53564c-4132-40bd-a4d5-1d35473f224f	ESCA	0.26	FALSE	0.2	0.130435	0.652174	0.475803	0.711031	-1	-1	-1	-1	-1	WES_validated/WGS_unavailable
chr17	7674212	TGGGCCT	AGGGAA	TP53	tumor_suppressor_gene	NM_000546.5	R249_I251fs	frameshift	85	125	231	0	137	113	70c5ce85-4022-46c0-8bd0-f5e9009ddf41	ESCA	0.55	FALSE	0.595238	0.452	0.75936	0.00269528	0.0124223	-1	39	55	43	0	WES_validated/WGS_validated
chr17	7674226	ATGCCGCCCAT	A	TP53	tumor_suppressor_gene	NM_000546.5	M243_M246fs	frameshift	64	5	77	0	43	7	cf9d5813-da70-4d7f-8185-d29d1b86b578	LUSC	0.37	FALSE	0.0724638	0.14	1.932	0.355382	0.58977	-1	74	13	31	0	WES_validated/WGS_validated
chr17	7674863	G	GGCGGCTC	TP53	tumor_suppressor_gene	NM_000546.5	P223fs	frameshift	19	37	201	2	2	6	a086aba1-0df5-497b-85e7-bc84aac1acec	LAML	-1	FALSE	0.660714	0.75	1.13514	1	1	-1	-1	-1	-1	-1	WES_validated/WGS_unavailable
chr17	7674894	GAA	G	TP53	tumor_suppressor_gene	NM_000546.5	F212fs	frameshift	0	1	0	0	11	6	2d02bd7a-5beb-4e43-9ccb-18d89c9d5ca2	COAD	0.84	FALSE	1	0.352941	0.352941	0.388889	0.624251	-1	13	60	36	0	WES_validated/WGS_validated
chr17	7674938	TC	T	TP53	tumor_suppressor_gene	NM_000546.5	E198fs	frameshift	76	1	96	0	59	2	67f526f1-def5-43b4-bc89-154baae190fc	OV	0.9	FALSE	0.012987	0.0327869	2.52459	0.583498	0.800054	-1	-1	-1	-1	-1	WES_validated/WGS_unavailable
chr17	7675223	A	AGG	TP53	tumor_suppressor_gene	NM_000546.5	L130fs	frameshift	30	106	129	0	68	43	c3f9ee36-d34f-472b-ac7f-801a0d400aa4	OV	-1	FALSE	0.779412	0.387387	0.497025	4.43e-10	9.82e-09	-1	20	62	35	0	WES_validated/WGS_validated
chr17	7675228	AG	A	TP53	tumor_suppressor_gene	NM_000546.5	P128fs	frameshift	8	31	61	4	4	18	153bc9ff-39c9-4890-a085-a46c530a7e97	LAML	0.94	FALSE	0.794872	0.818182	1.02933	1	1	-1	-1	-1	-1	-1	WES_validated/WGS_unavailable
chr17	7676002	TCA	T	TP53	tumor_suppressor_gene	NM_000546.5	V122fs	frameshift	15	18	20	0	16	15	5fd9552a-c742-4388-940d-295d1107ae00	BRCA	0.79	FALSE	0.545455	0.483871	0.887097	0.802671	0.94067	-1	11	14	27	0	WES_validated/WGS_validated
chr17	7676152	CG	C	TP53	tumor_suppressor_gene	NM_000546.5	P72fs	frameshift	5	7	400	2	31	8	c1cac0d3-8074-4636-a0b9-47eeede6503b	LUSC	0.48	FALSE	0.583333	0.205128	0.351648	0.0257906	0.0860613	-1	-1	-1	-1	-1	WES_validated/WGS_unavailable
chr17	7676154	GGGG	CGA	TP53	tumor_suppressor_gene	NM_000546.5	P71_P72fs	frameshift	80	90	214	0	16	6	1427cd18-5ad3-491a-9981-908e31ae49db	LUAD	0.49	FALSE	0.529412	0.272727	0.515152	0.0394752	0.118553	-1	2	3	7	0	WES_validated/WGS_validated
chr17	7676207	G	GA	TP53	tumor_suppressor_gene	NM_000546.5	F54fs	frameshift	32	3	39	0	231	16	c836951b-3ffb-4e20-8504-0eccb7d50dd4	BRCA	-1	FALSE	0.0857143	0.0647773	0.755735	0.71534	0.889161	-1	67	5	22	0	WES_validated/WGS_validated
chr17	7676228	CG	C	TP53	tumor_suppressor_gene	NM_000546.5	P47fs	frameshift	133	535	828	0	65	53	955c80be-53df-4565-9303-a7abf96a2f81	OV	0.81	FALSE	0.800898	0.449153	0.560811	2.93e-14	9.75e-13	-1	-1	-1	-1	-1	WES_validated/WGS_unavailable
chr17	7676261	CG	C	TP53	tumor_suppressor_gene	NM_000546.5	P36fs	frameshift	65	32	157	0	11	83	27fceec1-3298-4cdd-a4e6-8f5cf34604f0	LUAD	0.56	TRUE	0.329897	0.882979	2.67653	1.71e-15	6.63e-14	-1	3	4	49	0	WES_validated/WGS_validated
chr17	7676261	C	CGGCAAGGG	TP53	tumor_suppressor_gene	NM_000546.5	P36fs	frameshift	14	28	56	0	16	85	ceaf98f8-517e-457a-bf29-acfe22893d49	ESCA	0.6	FALSE	0.666667	0.841584	1.26238	0.0248418	0.083796	-1	-1	-1	-1	-1	WES_validated/WGS_unavailable
chr17	7909287	T	TC	CHD3	tumor_suppressor_gene	NM_001005273.3	S1847fs	frameshift	3	2	12	0	22	36	f3b86c02-09a5-4e97-aa7a-86f13f7cda4b	BRCA	0.69	FALSE	0.4	0.62069	1.55172	0.377398	0.614061	-1	35	27	37	0	WES_validated/WGS_validated
chr17	16040445	C	CT	NCOR1	tumor_suppressor_gene	NM_006311.4	T2243fs	frameshift	170	15	164	0	187	12	42f6f503-4cf6-4a8e-b5fe-b44bccf6b38b	BRCA	0.28	FALSE	0.0810811	0.0603015	0.743719	0.433744	0.669678	-1	-1	-1	-1	-1	WES_validated/WGS_unavailable
chr17	31336722	GC	G	NF1	tumor_suppressor_gene	NM_000267.3	A2058fs	frameshift	9	31	23	26	2	7	b4be9e07-e65c-4ef7-9c52-90141f9964fe	PCPG	0.69	FALSE	0.775	0.777778	1.00358	1	1	-1	11	52	20	20	WES_validated/WGS_validated
chr17	31340616	TTAGA	T	NF1	tumor_suppressor_gene	NM_000267.3	L2324_D2325fs	frameshift	69	5	47	0	19	4	081b6532-0ed4-445a-becb-cb2290f4854d	LGG	0.7	FALSE	0.0675676	0.173913	2.57391	0.209305	0.406813	-1	92	11	44	0	WES_validated/WGS_validated
chr17	31349221	G	GT	NF1	tumor_suppressor_gene	NM_000267.3	V2410fs	frameshift	34	1	75	0	41	4	07fbdb3c-8337-4319-8255-f2363f8a031e	OV	0.86	FALSE	0.0285714	0.0888889	3.11111	0.37926	0.614664	-1	-1	-1	-1	-1	WES_validated/WGS_unavailable
chr17	39727512	GCTACGTTGC	G	ERBB2	oncogene	NM_004448.3	Y1127_A1129del	proteinDel	25	9	10	0	551	448	7f2a63e6-64d5-4be1-9814-e8416fc9e688	BRCA	0.43	FALSE	0.264706	0.448448	1.69414	0.0357773	0.110294	2	152	41	44	0	WES_validated/WGS_validated
chr17	46039782	C	CT	KANSL1	tumor_suppressor_gene	NM_015443.3	R708fs	frameshift	70	70	394	19	58	44	cfb6e5b0-34ed-4f8a-9057-c48de5e28645	LAML	0.92	FALSE	0.5	0.431373	0.862745	0.300218	0.526371	-1	-1	-1	-1	-1	WES_validated/WGS_unavailable
chr17	46171566	A	AT	KANSL1	tumor_suppressor_gene	NM_015443.3	M193fs	frameshift	148	14	153	0	17	7	9c377f9b-79dd-4412-80ac-cea9a3529888	KIRC	0.6	FALSE	0.0864198	0.291667	3.375	0.00851995	0.0329132	-1	-1	-1	-1	-1	WES_validated/WGS_unavailable
chr17	58357769	GGGCCGAGAGCCAGGGGTGGGCTC	G	RNF43	tumor_suppressor_gene	NM_017763.5	E662_P669fs	frameshift	206	6	207	0	104	40	ae633e83-303f-4a90-ac3b-34458fd9beef	STAD	0.19	TRUE	0.0283019	0.277778	9.81481	4.13e-12	1.07e-10	-1	109	8	45	0	WES_validated/WGS_validated
chr17	58357799	AC	A	RNF43	tumor_suppressor_gene	NM_017763.5	G659fs	frameshift	71	40	291	1	171	82	00781a96-4068-427c-a9c5-584d167c3dea	STAD	0.74	FALSE	0.36036	0.324111	0.899407	0.54689	0.773066	-1	78	45	51	0	WES_validated/WGS_validated
chr17	58357799	AC	A	RNF43	tumor_suppressor_gene	NM_017763.5	G659fs	frameshift	75	114	161	2	9	49	028632ed-d75a-49bb-b579-41962ba502fe	STAD	0.62	TRUE	0.603175	0.844828	1.40064	0.00076261	0.00411439	-1	45	53	40	0	WES_validated/WGS_validated
chr17	58357799	AC	A	RNF43	tumor_suppressor_gene	NM_017763.5	G659fs	frameshift	45	34	145	3	42	95	08c73b36-ede5-4136-b73b-0e964d432f89	STAD	0.63	TRUE	0.43038	0.693431	1.61121	0.000179861	0.00119608	-1	34	32	33	0	WES_validated/WGS_validated
chr17	58357799	AC	A	RNF43	tumor_suppressor_gene	NM_017763.5	G659fs	frameshift	142	47	161	3	77	33	0f3e2f16-1c06-4128-af45-ee73de19ea69	STAD	0.27	FALSE	0.248677	0.3	1.20638	0.345697	0.581955	-1	69	25	52	0	WES_validated/WGS_validated
chr17	58357799	AC	A	RNF43	tumor_suppressor_gene	NM_017763.5	G659fs	frameshift	165	33	157	1	27	16	44799c67-61cd-4f3e-bdbc-423e2e0fd2e8	STAD	0.35	FALSE	0.166667	0.372093	2.23256	0.0055638	0.0229199	-1	-1	-1	-1	-1	WES_validated/WGS_unavailable
chr17	58357799	AC	A	RNF43	tumor_suppressor_gene	NM_017763.5	G659fs	frameshift	118	10	159	0	106	18	cca74404-cd91-4a69-ae09-bfb5d9142d3d	STAD	0.3	FALSE	0.078125	0.145161	1.85806	0.109667	0.263145	-1	-1	-1	-1	-1	WES_validated/WGS_unavailable
chr17	58357843	AT	A	RNF43	tumor_suppressor_gene	NM_017763.5	K644fs	frameshift	192	12	147	0	49	7	44799c67-61cd-4f3e-bdbc-423e2e0fd2e8	STAD	0.35	FALSE	0.0588235	0.125	2.125	0.141486	0.30921	-1	91	5	51	0	WES_validated/WGS_validated
chr17	58358488	CA	C	RNF43	tumor_suppressor_gene	NM_017763.5	A429fs	frameshift	48	3	53	0	67	38	cca74404-cd91-4a69-ae09-bfb5d9142d3d	STAD	0.3	TRUE	0.0588235	0.361905	6.15238	2.95e-05	0.00027185	-1	106	10	62	0	WES_validated/WGS_validated
chr17	58360795	GA	G	RNF43	tumor_suppressor_gene	NM_017763.5	F279fs	frameshift	29	2	86	0	84	65	b12d9857-9ae1-445b-a963-b630b27b254e	STAD	0.38	TRUE	0.0645161	0.436242	6.76174	5.87e-05	0.000472449	-1	75	11	46	0	WES_validated/WGS_validated
chr17	58360861	AC	A	RNF43	tumor_suppressor_gene	NM_017763.5	G257fs	frameshift	48	3	51	0	126	12	e2b33861-2247-413f-b2e5-9be3b604666c	PRAD	0.54	FALSE	0.0588235	0.0869565	1.47826	0.762921	0.916355	-1	8	1	33	0	WES_validated/WGS_validated
chr17	58370936	C	CG	RNF43	tumor_suppressor_gene	NM_017763.5	R117fs	frameshift	24	12	113	0	0	15	7840d10b-4927-4731-8dda-5f288da21bef	STAD	0.62	TRUE	0.333333	1	3	5.86e-06	6.13e-05	-1	35	30	40	0	WES_validated/WGS_validated
chr17	58370936	CG	C	RNF43	tumor_suppressor_gene	NM_017763.5	R117fs	frameshift	37	10	105	0	43	23	86cbca52-29bd-4b88-a203-e8b9a072bd4b	STAD	0.64	FALSE	0.212766	0.348485	1.63788	0.143982	0.313032	-1	78	23	24	0	WES_validated/WGS_validated
chr17	58370936	CG	C	RNF43	tumor_suppressor_gene	NM_017763.5	R117fs	frameshift	29	12	31	0	21	16	a0d35a25-3500-46f3-874f-1a0820200473	STAD	0.84	FALSE	0.292683	0.432432	1.47748	0.241137	0.450595	-1	51	30	43	0	WES_validated/WGS_validated
chr17	58370936	C	CG	RNF43	tumor_suppressor_gene	NM_017763.5	R117fs	frameshift	31	19	57	0	84	95	c3cba26e-38c2-4569-afd6-6b045e604808	STAD	0.87	FALSE	0.38	0.530726	1.39665	0.0780173	0.202323	-1	25	8	38	0	WES_validated/WGS_validated
chr17	58415538	GCCAGAGGGC	ACCAG	RNF43	tumor_suppressor_gene	NM_017763.5	A11_P14fs	frameshift	117	51	104	0	0	17	d8aa891c-8050-471e-ad3e-32b9c5e9db03	PAAD	0.63	TRUE	0.303571	1	3.29412	9.8e-09	1.66e-07	-1	51	15	31	0	WES_validated/WGS_validated
chr17	65558608	TA	T	AXIN2	tumor_suppressor_gene	NM_004655.4	A4fs	frameshift	2	4	10	0	8	16	c2395f04-e248-4091-855d-802b1b871f29	READ	0.89	FALSE	0.666667	0.666667	1	1	1	-1	-1	-1	-1	-1	WES_validated/WGS_unavailable
chr17	68530412	TC	T	PRKAR1A	tumor_suppressor_gene	NM_002734.5	I370fs	frameshift	21	85	129	1	23	139	dfd687bc-6e69-42f7-af94-d17fc150d1a1	ACC	0.93	FALSE	0.801887	0.858025	1.07001	0.24106	0.450595	-1	11	61	44	0	WES_validated/WGS_validated
chr17	72121431	C	CA	SOX9	tumor_suppressor_gene	NM_000346.4	Q14fs	frameshift	0	3	10	0	52	47	065b26fc-6827-44d5-83d8-1100c63fcda6	READ	0.81	FALSE	1	0.474747	0.474747	0.114153	0.269736	-1	58	34	57	0	WES_validated/WGS_validated
chr17	72122723	CT	C	SOX9	tumor_suppressor_gene	NM_000346.4	L146fs	frameshift	22	15	19	0	65	20	192da41f-f0a5-494e-8eb9-96bcdae56ff8	COAD	0.73	FALSE	0.405405	0.235294	0.580392	0.0806106	0.207891	-1	-1	-1	-1	-1	WES_validated/WGS_unavailable
chr17	72123621	A	AGG	SOX9	tumor_suppressor_gene	NM_000346.4	E255fs	frameshift	25	2	12	0	46	39	21bdad0d-c6a2-428c-b2b4-0de282b34abc	COAD	0.23	TRUE	0.0740741	0.458824	6.19412	0.000185274	0.00121472	-1	-1	-1	-1	-1	WES_validated/WGS_unavailable
chr17	72123621	A	AG	SOX9	tumor_suppressor_gene	NM_000346.4	E255fs	frameshift	97	17	169	0	85	52	19089ae0-b590-4649-9d94-a147fa506e32	COAD	0.23	TRUE	0.149123	0.379562	2.5453	5.89e-05	0.000472449	-1	88	19	38	0	WES_validated/WGS_validated
chr17	72123768	CG	C	SOX9	tumor_suppressor_gene	NM_000346.4	P304fs	frameshift	11	2	41	0	100	22	bc42fe2d-1a33-428d-a601-b1871f4c8d9b	COAD	0.51	FALSE	0.153846	0.180328	1.17213	1	1	-1	126	19	36	0	WES_validated/WGS_validated
chr17	72123772	G	GGT	SOX9	tumor_suppressor_gene	NM_000346.4	P307fs	frameshift	52	19	9	0	51	57	57a2044d-20cc-4d02-b268-ce570a0fabe3	COAD	0.56	TRUE	0.267606	0.527778	1.97222	0.000658058	0.00364674	-1	-1	-1	-1	-1	WES_validated/WGS_unavailable
chr17	72123773	G	GT	SOX9	tumor_suppressor_gene	NM_000346.4	V306fs	frameshift	20	2	8	0	32	35	21bdad0d-c6a2-428c-b2b4-0de282b34abc	COAD	0.23	TRUE	0.0909091	0.522388	5.74627	0.000342245	0.00208255	-1	78	31	49	0	WES_validated/WGS_validated
chr17	72123945	AG	A	SOX9	tumor_suppressor_gene	NM_000346.4	Q363fs	frameshift	1	3	10	0	1	11	93ca8937-97c0-4f6e-bdec-66d32f2a7b3d	COAD	0.88	FALSE	0.75	0.916667	1.22222	0.45	0.684559	-1	-1	-1	-1	-1	WES_validated/WGS_unavailable
chr17	72123952	GC	G	SOX9	tumor_suppressor_gene	NM_000346.4	P366fs	frameshift	3	4	15	0	9	9	c46971a1-cbac-425d-bac2-f4142c92522e	COAD	-1	FALSE	0.571429	0.5	0.875	1	1	-1	-1	-1	-1	-1	WES_validated/WGS_unavailable
chr17	72123972	CA	C	SOX9	tumor_suppressor_gene	NM_000346.4	A372fs	frameshift	2	4	8	0	11	25	c8de215d-53a4-4e6c-be58-5887a8094815	COAD	0.76	FALSE	0.666667	0.694444	1.04167	1	1	-1	-1	-1	-1	-1	WES_validated/WGS_unavailable
chr17	72123987	CACAGGCGCAC	G	SOX9	tumor_suppressor_gene	NM_000346.4	P377_H380fs	frameshift	23	12	4	0	48	25	d9fb85c3-ade1-47bf-8159-170f81eb130f	COAD	-1	FALSE	0.342857	0.342466	0.998858	1	1	-1	-1	-1	-1	-1	WES_validated/WGS_unavailable
chr17	72124072	C	CCACTA	SOX9	tumor_suppressor_gene	NM_000346.4	S408fs	frameshift	39	62	122	0	353	594	0dacc5ce-498f-4c60-9f78-7a013ffaa9ce	COAD	0.69	FALSE	0.613861	0.627244	1.0218	0.828944	0.962277	-1	54	53	35	0	WES_validated/WGS_validated
chr17	72124073	C	CA	SOX9	tumor_suppressor_gene	NM_000346.4	H406fs	frameshift	178	18	29	0	326	228	7144a65f-a63f-4b79-8fe2-cfe48696de03	COAD	0.21	TRUE	0.0918367	0.411552	4.48135	1.59e-18	1.06e-16	-1	92	16	51	0	WES_validated/WGS_validated
chr17	72124204	CT	C	SOX9	tumor_suppressor_gene	NM_000346.4	S450fs	frameshift	448	1	324	0	225	3	6fa41234-9077-4d05-a295-6820f3bedf5b	COAD	0.8	FALSE	0.00222717	0.0131579	5.90789	0.113537	0.26965	-1	5	0	0	0	WES_validated/WGS_failed_with_probability_0.988913638
chr17	72124338	G	GC	SOX9	tumor_suppressor_gene	NM_000346.4	S494fs	frameshift	16	7	16	0	92	68	02f9668c-71e6-485f-88b1-b37dc8bdd2ab	COAD	0.5	FALSE	0.304348	0.425	1.39643	0.365416	0.598947	-1	94	34	26	0	WES_validated/WGS_validated
chr17	82832166	CAG	C	ZNF750	tumor_suppressor_gene	NM_024702.3	S96fs	frameshift	71	6	140	0	103	122	b98867d7-7d5a-4c58-8878-37bee6f2f4fa	HNSC	0.18	TRUE	0.0779221	0.542222	6.95852	5.46e-14	1.7e-12	-1	90	12	41	0	WES_validated/WGS_validated
chr18	3457433	TC	T	TGIF1	tumor_suppressor_gene	NM_170695.5	P85fs	frameshift	9	3	29	0	47	536	1e89c189-7c8a-44c9-9b0f-2f625a285003	READ	0.64	TRUE	0.25	0.919383	3.67753	5.49e-08	8.65e-07	-1	30	32	39	0	WES_validated/WGS_validated
chr18	3457802	TAC	T	TGIF1	tumor_suppressor_gene	NM_170695.5	T208fs	frameshift	38	2	22	0	110	72	567ddc8e-2b00-417d-a326-479cb02e08dd	COAD	0.23	TRUE	0.05	0.395604	7.91209	5.35e-06	5.66e-05	-1	85	10	49	0	WES_validated/WGS_validated
chr18	51065549	GCTTTTGTTTGGGTCAACTCTCCAATGTCCA	G	SMAD4	oncogene	NM_005359.6	F362_H371del	proteinDel	155	33	206	0	64	20	33901c6f-9180-4a19-866c-f4ac6bec76da	STAD	0.27	FALSE	0.175532	0.238095	1.35642	0.248063	0.457319	0	65	12	38	0	WES_validated/WGS_validated
chr18	51078399	CG	C	SMAD4	tumor_suppressor_gene	NM_005359.6	R531fs	frameshift	52	60	154	0	49	47	dc22eba5-6fb7-4875-b30a-99fa00758301	COAD	0.41	FALSE	0.535714	0.489583	0.913889	0.57812	0.799647	-1	51	41	37	0	WES_validated/WGS_validated
chr18	51078423	GTACTTCA	G	SMAD4	tumor_suppressor_gene	NM_005359.6	V539_H541fs	frameshift	97	10	100	0	71	9	09078761-1c14-4d01-8e15-535c19a9b0f9	LUAD	0.25	FALSE	0.0934579	0.1125	1.20375	0.807521	0.943588	-1	73	6	40	0	WES_validated/WGS_validated
chr19	1207036	GCGGGCCAAGCT	G	STK11	tumor_suppressor_gene	NM_000455.5	R42_L45fs	frameshift	46	3	61	0	144	35	d94fe32f-bedd-4f4c-9feb-fcb60d40f4bb	LUAD	0.45	FALSE	0.0612245	0.195531	3.19367	0.0291763	0.0943164	-1	94	13	48	0	WES_validated/WGS_validated
chr19	1207137	G	GCTCCT	STK11	tumor_suppressor_gene	NM_000455.5	R75fs	frameshift	17	12	19	0	58	22	54a0e4d7-c274-4569-9c25-45bbe26d7f21	LUAD	0.27	FALSE	0.413793	0.275	0.664583	0.241511	0.450595	-1	-1	-1	-1	-1	WES_validated/WGS_unavailable
chr19	1219389	GT	G	STK11	tumor_suppressor_gene	NM_000455.5	R147fs	frameshift	11	5	4	0	40	11	474b86d9-d897-467d-85d4-51dfa26ea107	LUAD	0.37	FALSE	0.3125	0.215686	0.690196	0.505568	0.733152	-1	1	1	2	0	WES_validated/WGS_validated
chr19	1220396	GCCTGGAGT	G	STK11	tumor_suppressor_gene	NM_000455.5	G163_Y166fs	frameshift	2	5	6	0	61	22	27c9e7aa-1760-4cfc-95b0-a091d35d317b	SKCM	0.65	FALSE	0.714286	0.26506	0.371084	0.0237175	0.0805876	-1	34	52	53	0	WES_validated/WGS_validated
chr19	1220444	C	CG	STK11	tumor_suppressor_gene	NM_000455.5	P179fs	frameshift	9	2	21	0	9	28	0a1eea76-e19a-4547-9b24-abf7051cc4db	LUAD	0.58	TRUE	0.181818	0.756757	4.16216	0.000995533	0.00523639	-1	35	29	44	0	WES_validated/WGS_validated
chr19	1220466	C	CG	STK11	tumor_suppressor_gene	NM_000455.5	G188fs	frameshift	3	4	10	0	9	11	c4c1469d-752f-42b6-8686-714ad4a8ac97	LUAD	-1	FALSE	0.571429	0.55	0.9625	1	1	-1	3	2	52	0	WES_validated/WGS_validated
chr19	1220639	TC	T	STK11	tumor_suppressor_gene	NM_000455.5	F219fs	frameshift	13	4	26	0	34	16	986ced10-52b9-43b4-84ad-96013a657f1b	LUSC	0.24	FALSE	0.235294	0.32	1.36	0.75971	0.91628	-1	-1	-1	-1	-1	WES_validated/WGS_unavailable
chr19	1221271	GAG	AA	STK11	tumor_suppressor_gene	NM_000455.5	E265fs	frameshift	8	5	25	0	74	52	4075717b-2240-4842-a00a-0c4dbcb910c4	HNSC	0.57	FALSE	0.384615	0.412698	1.07302	1	1	-1	26	12	61	0	WES_validated/WGS_validated
chr19	1221314	GC	G	STK11	tumor_suppressor_gene	NM_000455.5	G279fs	frameshift	2	1	1	0	59	26	07b5663f-9a54-4462-b6c1-6fc8116b8714	LUAD	0.33	FALSE	0.333333	0.305882	0.917647	1	1	-1	50	4	61	0	WES_validated/WGS_validated
chr19	1221314	GC	G	STK11	tumor_suppressor_gene	NM_000455.5	G279fs	frameshift	1	4	11	0	29	43	6eae9623-b4f2-440c-8283-46c7016f953a	LUSC	0.71	FALSE	0.8	0.597222	0.746528	0.643001	0.846724	-1	17	59	29	0	WES_validated/WGS_validated
chr19	1221314	GC	G	STK11	tumor_suppressor_gene	NM_000455.5	G279fs	frameshift	3	7	24	0	15	25	fd5c44ef-ea50-4fba-9e8d-e371cf34ebdb	LUAD	0.61	FALSE	0.7	0.625	0.892857	0.730055	0.899813	-1	-1	-1	-1	-1	WES_validated/WGS_unavailable
chr19	1221319	CC	G	STK11	tumor_suppressor_gene	NM_000455.5	P281fs	frameshift	0	6	16	0	27	48	daf0e08e-1738-43f8-874a-b37d79cbe3a7	LUAD	0.78	FALSE	1	0.64	0.64	0.171309	0.353633	-1	19	43	37	0	WES_validated/WGS_validated
chr19	1221320	CG	C	STK11	tumor_suppressor_gene	NM_000455.5	P281fs	frameshift	12	1	11	0	33	6	5a2f8140-8f90-4e94-b703-5fa5aa96be7b	LUAD	0.28	FALSE	0.0769231	0.153846	2	0.664318	0.857471	-1	52	12	38	0	WES_validated/WGS_validated
chr19	1221325	TCTGACCTG	T	STK11	tumor_suppressor_gene	NM_000455.5	S283_L285fs	frameshift	3	4	26	0	21	55	7f6455e8-fa3d-4452-acb2-8c9995073072	LUAD	0.37	FALSE	0.571429	0.723684	1.26645	0.406746	0.645112	-1	56	94	55	0	WES_validated/WGS_validated
chr19	1223056	GGTGGCGCAGCATGA	G	STK11	tumor_suppressor_gene	NM_000455.5	R331_T336fs	frameshift	2	10	11	0	33	74	fe3eeeb6-0db4-46d7-a020-55604d474c12	LUAD	0.84	FALSE	0.833333	0.691589	0.829907	0.5055	0.733152	-1	-1	-1	-1	-1	WES_validated/WGS_unavailable
chr19	1430254	GC	G	DAZAP1	tumor_suppressor_gene	NM_170711.3	A255fs	frameshift	4	1	7	0	161	118	b9a81947-0348-4fe6-a0ac-d674cd13aa99	LUSC	0.77	FALSE	0.2	0.422939	2.1147	0.403382	0.641963	-1	-1	-1	-1	-1	WES_validated/WGS_unavailable
chr19	10486801	TGTGA	CACACGTCATAG	KEAP1	tumor_suppressor_gene	NM_203500.2	G574_T576fs	frameshift	48	35	96	0	66	246	0075437e-ba1a-46be-86d6-9773209a2b5e	LUAD	0.46	TRUE	0.421687	0.788462	1.86978	4.61e-10	9.93e-09	-1	-1	-1	-1	-1	WES_validated/WGS_unavailable
chr19	10491643	AC	A	KEAP1	tumor_suppressor_gene	NM_203500.2	V420fs	frameshift	5	7	25	0	22	29	2a43e61e-2151-4c5a-b062-74ce9dfd8d4a	LUAD	0.53	FALSE	0.583333	0.568627	0.97479	1	1	-1	-1	-1	-1	-1	WES_validated/WGS_unavailable
chr19	10499660	ATGGACACCACCTCCATGCCC	A	KEAP1	tumor_suppressor_gene	NM_203500.2	Q118_I125fs	frameshift	42	6	45	1	69	15	52a7f734-da07-49c5-861d-c70da37ff959	LIHC	0.35	FALSE	0.125	0.178571	1.42857	0.468935	0.706438	-1	100	12	52	0	WES_validated/WGS_validated
chr19	10499856	T	TA	KEAP1	tumor_suppressor_gene	NM_203500.2	T60fs	frameshift	89	4	152	0	44	7	c52abac9-07da-4b3d-bf8a-2161cacf9682	LIHC	0.3	FALSE	0.0430108	0.137255	3.19118	0.05304	0.15101	-1	45	4	46	0	WES_validated/WGS_validated
chr19	11007956	GAGA	G	SMARCA4	oncogene	NM_001128849.3	K689del	proteinDel	39	117	159	0	1	46	747083ff-0703-431b-aad4-f2adff739516	BRCA	0.77	TRUE	0.75	0.978723	1.30496	0.000236452	0.00149753	0	27	76	41	0	WES_validated/WGS_validated
chr19	11019661	CGTACGAGTACATCATCAAAGACA	C	SMARCA4	tumor_suppressor_gene	NM_001128849.3	T859_K867fs	frameshift	28	1	18	0	72	4	69b23036-add9-42c9-941f-02fb74d9b08c	LUAD	0.61	FALSE	0.0344828	0.0526316	1.52632	1	1	-1	36	3	47	0	WES_validated/WGS_validated
chr19	11059842	TGAG	T	SMARCA4	oncogene	NM_001128849.3	E1612del	proteinDel	18	1	33	0	163	43	28346e70-c18b-4572-922f-c7b7fa8af40d	LUSC	0.24	FALSE	0.0526316	0.208738	3.96602	0.133321	0.300062	0	-1	-1	-1	-1	WES_validated/WGS_unavailable
chr19	18169217	CACA	C	PIK3R2	oncogene	NM_005027.4	N705del	proteinDel	16	1	15	0	58	11	634d542b-a72f-408b-9fef-65ef6c45f882	READ	0.5	FALSE	0.0588235	0.15942	2.71014	0.445519	0.681081	0	109	12	53	0	WES_validated/WGS_validated
chr19	18169233	CCGTCACCCTGGCGCACCCAGTGCG	C	PIK3R2	oncogene	NM_005027.4	V710_R717del	proteinDel	9	2	18	0	1	7	f57122dd-a6f1-484d-b08a-cb1194de2f9d	BLCA	0.38	FALSE	0.181818	0.875	4.8125	0.00547749	0.0227658	0	121	43	89	0	WES_validated/WGS_validated
chr19	33301498	C	CGCT	CEBPA	oncogene	NM_004364.4	Q305>QQ	proteinIns	29	27	121	20	92	49	c532cfda-a8fa-4a8a-92ba-33ad8b47404d	LAML	-1	FALSE	0.482143	0.347518	0.720778	0.104337	0.253623	3	-1	-1	-1	-1	WES_validated/WGS_unavailable
chr19	35721341	TGCTTACTCCTCCTCCTCTTGGG	T	KMT2B	tumor_suppressor_gene	NM_014727.3	V665_G672fs	frameshift	72	3	108	0	19	4	0d146997-cfdc-4587-888c-e876fc455c80	BRCA	0.49	FALSE	0.04	0.173913	4.34783	0.0505353	0.145661	-1	85	11	36	0	WES_validated/WGS_validated
chr19	35727239	TGGGTGCATGCCAAGTGCGAG	T	KMT2B	tumor_suppressor_gene	NM_014727.3	W1363_E1369fs	frameshift	15	6	26	0	59	41	82d5f37f-5a1b-49d8-b990-ac222b4e1c1d	BLCA	0.88	FALSE	0.285714	0.41	1.435	0.333559	0.567721	-1	84	43	47	0	WES_validated/WGS_validated
chr19	35728845	CAG	C	KMT2B	tumor_suppressor_gene	NM_014727.3	P1548_E1549fs	frameshift	58	3	50	0	129	17	72d6e9aa-4a99-4fc9-a67b-4631e95fb043	BLCA	0.57	FALSE	0.0491803	0.116438	2.36758	0.19666	0.389552	-1	161	20	25	0	WES_validated/WGS_validated
chr19	35732100	TG	T	KMT2B	tumor_suppressor_gene	NM_014727.3	L1877fs	frameshift	26	22	30	1	4	8	233e947a-d5e2-48e5-a8ce-5da1abb20681	UCEC	0.85	FALSE	0.458333	0.666667	1.45455	0.333412	0.567721	-1	7	1	5	0	WES_validated/WGS_validated
chr19	35732810	GC	G	KMT2B	tumor_suppressor_gene	NM_014727.3	P2088fs	frameshift	92	16	15	0	16	16	74aa6675-28b7-46dc-9015-f07a07c7b018	PAAD	0.43	TRUE	0.148148	0.5	3.375	0.000163079	0.00111637	-1	100	28	58	0	WES_validated/WGS_validated
chr19	35733425	TC	T	KMT2B	tumor_suppressor_gene	NM_014727.3	P2293fs	frameshift	3	3	6	0	4	5	34f216fb-09dc-48af-9e09-7d12cc07c1f7	GBM	0.83	FALSE	0.5	0.555556	1.11111	1	1	-1	26	24	50	0	WES_validated/WGS_validated
chr19	42289058	G	GT	CIC	tumor_suppressor_gene	NM_015125.4	V368fs	frameshift	67	3	119	0	96	3	325138ab-2947-4131-b40e-971f024723cc	LGG	0.89	FALSE	0.0428571	0.030303	0.707071	0.692678	0.876555	-1	65	4	41	0	WES_validated/WGS_validated
chr19	42294837	C	CA	CIC	tumor_suppressor_gene	NM_015125.4	A1492fs	frameshift	66	8	160	0	87	15	c2f9dff7-751b-4704-8e6e-f4f800297030	LGG	0.9	FALSE	0.108108	0.147059	1.36029	0.503664	0.733152	-1	68	4	58	0	WES_validated/WGS_validated
chr19	42295014	TCCCAGCCCCGCAGGGGG	T	CIC	tumor_suppressor_gene	NM_015125.4	P1551_G1556fs	frameshift	11	6	14	0	72	52	239b4298-b090-480a-a19f-9758a827aa30	LIHC	0.72	FALSE	0.352941	0.419355	1.18817	0.793593	0.935337	-1	59	26	54	0	WES_validated/WGS_validated
chr19	46920409	TATCCGGCCGTC	T	ARHGAP35	tumor_suppressor_gene	NM_004491.5	I579_S582fs	frameshift	121	6	72	0	90	9	ccb22ecc-6e18-44b8-ad48-6ab51314b16e	BRCA	-1	FALSE	0.0472441	0.0909091	1.92424	0.281178	0.504397	-1	114	9	39	0	WES_validated/WGS_validated
chr20	22582164	GGGGCGGGCCCAGCAGGT	G	FOXA2	tumor_suppressor_gene	NM_021784.4	H354_P359fs	frameshift	8	3	12	0	10	33	b8588e0f-aad6-4ded-845e-3cff67a48d8f	UCEC	0.86	FALSE	0.272727	0.767442	2.81395	0.00360071	0.0158125	-1	121	65	57	0	WES_validated/WGS_validated
chr20	22582168	CGGGCCCAGCAGGTG	C	FOXA2	tumor_suppressor_gene	NM_021784.4	H354_P358fs	frameshift	4	1	7	0	10	7	6dfe9121-29a0-4593-984f-1644166e1d39	UCS	0.72	FALSE	0.2	0.411765	2.05882	0.612972	0.821118	-1	69	23	30	0	WES_validated/WGS_validated
chr20	22582168	CGGGCCCAGCAGGTG	C	FOXA2	tumor_suppressor_gene	NM_021784.4	H354_P358fs	frameshift	1	3	4	0	0	66	9240d5fc-de23-4436-8099-da9bd3054860	LUAD	0.69	FALSE	0.75	1	1.33333	0.0571429	0.159086	-1	23	20	43	0	WES_validated/WGS_validated
chr20	22582175	AGCAGGTGGGC	A	FOXA2	tumor_suppressor_gene	NM_021784.4	A353_L356fs	frameshift	4	3	3	0	8	21	9a50e7e4-831d-489f-87d2-979e987561cc	LUAD	0.49	FALSE	0.428571	0.724138	1.68966	0.190417	0.38133	-1	60	28	52	0	WES_validated/WGS_validated
chr20	22582178	AGGTGGGCCGCG	A	FOXA2	tumor_suppressor_gene	NM_021784.4	A351_L355fs	frameshift	17	16	14	1	1	6	d1c65e6a-098e-4c10-9183-c303ba66015a	UCEC	0.93	FALSE	0.484848	0.857143	1.76786	0.104798	0.254081	-1	48	54	49	0	WES_validated/WGS_validated
chr20	22582343	GCCGGCCCGGCGGCCTCC	G	FOXA2	tumor_suppressor_gene	NM_021784.4	G294_A300fs	frameshift	2	1	6	0	7	9	bca1057a-1e96-404d-8a37-5a8dc1944ee7	UCEC	0.65	FALSE	0.333333	0.5625	1.6875	0.582043	0.800054	-1	5	2	7	0	WES_validated/WGS_validated
chr20	22582878	G	GC	FOXA2	tumor_suppressor_gene	NM_021784.4	Q122fs	frameshift	10	6	5	0	22	10	ff82548a-f1bb-4daa-a8f7-b3831b5843ad	UCEC	0.87	FALSE	0.375	0.3125	0.833333	0.750059	0.912817	-1	6	2	43	0	WES_validated/WGS_validated
chr20	32434446	TATCAAACCACCCTGGGTGGTTA	T	ASXL1	tumor_suppressor_gene	NM_015338.6	I579_K586fs	frameshift	101	4	101	0	82	18	f76ab158-2cf9-4df7-b6fe-727dd69a369f	HNSC	0.24	TRUE	0.0380952	0.18	4.725	0.00121356	0.00617389	-1	86	12	52	0	WES_validated/WGS_validated
chr20	32434563	T	TA	ASXL1	tumor_suppressor_gene	NM_015338.6	A619fs	frameshift	6	4	9	0	4	9	91a2f2af-e4b1-4a0b-ab20-6a36ce63c533	BRCA	-1	FALSE	0.4	0.692308	1.73077	0.221545	0.425275	-1	-1	-1	-1	-1	WES_validated/WGS_unavailable
chr20	32434599	TCACCACTGCCATAGAGAGGCGGC	T	ASXL1	tumor_suppressor_gene	NM_015338.6	H630_A637fs	frameshift	17	6	19	0	21	5	ca8afb2c-be3d-41e8-8dbc-19fe7ab6154b	LIHC	0.61	FALSE	0.26087	0.192308	0.737179	0.734108	0.899813	-1	32	13	26	0	WES_validated/WGS_validated
chr20	32434614	AGAGGC	A	ASXL1	tumor_suppressor_gene	NM_015338.6	E635_A636fs	frameshift	21	1	30	0	13	4	5e15dcc7-932e-4d9a-a765-bd5ff1cd7aea	PRAD	0.34	FALSE	0.0454545	0.235294	5.17647	0.147427	0.318456	-1	69	15	40	0	WES_validated/WGS_validated
chr20	32434638	A	AG	ASXL1	tumor_suppressor_gene	NM_015338.6	G646fs	frameshift	21	3	25	0	16	15	70741b73-9683-42bd-87fc-6a021a70103b	HNSC	0.3	FALSE	0.125	0.483871	3.87097	0.00825846	0.03217	-1	-1	-1	-1	-1	WES_validated/WGS_unavailable
chr20	32434638	A	AG	ASXL1	tumor_suppressor_gene	NM_015338.6	G646fs	frameshift	17	3	20	0	18	6	81e7a3d3-be70-4834-8018-4d2cc077a4e6	BRCA	0.85	FALSE	0.15	0.25	1.66667	0.477132	0.711874	-1	80	44	46	1	WES_validated/WGS_validated
chr20	32434638	AG	A	ASXL1	tumor_suppressor_gene	NM_015338.6	G643fs	frameshift	48	16	122	2	9	11	69baba9f-19c2-4947-95dc-0dd3412929ba	CESC	0.46	FALSE	0.25	0.55	2.2	0.0260304	0.0865511	-1	-1	-1	-1	-1	WES_validated/WGS_unavailable
chr21	34792245	TG	T	RUNX1	tumor_suppressor_gene	NM_001754.4	P444fs	frameshift	11	1	9	0	115	62	42f6f503-4cf6-4a8e-b5fe-b44bccf6b38b	BRCA	0.28	FALSE	0.0833333	0.350282	4.20339	0.0642251	0.174325	-1	45	10	27	0	WES_validated/WGS_validated
chr21	34792332	AC	A	RUNX1	tumor_suppressor_gene	NM_001754.4	Q415fs	frameshift	1	5	13	0	12	43	1a679332-30a3-4495-a2e5-39d299e14333	BRCA	0.67	FALSE	0.833333	0.781818	0.938182	1	1	-1	11	33	22	0	WES_validated/WGS_validated
chr21	34792390	G	GGGGGGCA	RUNX1	tumor_suppressor_gene	NM_001754.4	F396fs	frameshift	1	2	3	0	71	38	196d4b0c-a4ec-4915-b706-ada86ab483ae	LAML	0.78	FALSE	0.666667	0.348624	0.522936	0.289751	0.511875	-1	-1	-1	-1	-1	WES_validated/WGS_unavailable
chr21	34792578	G	GC	RUNX1	tumor_suppressor_gene	NM_001754.4	R334fs	frameshift	11	2	21	0	135	49	2ab1b35b-9e56-475c-ac9b-15ed0a422683	BRCA	0.57	FALSE	0.153846	0.266304	1.73098	0.520671	0.750382	-1	67	35	46	0	WES_validated/WGS_validated
chr21	34792602	C	CG	RUNX1	tumor_suppressor_gene	NM_001754.4	D326fs	frameshift	5	1	3	0	274	141	8d9b50d1-139b-4447-ae9c-e54764d9e2a7	BRCA	0.77	FALSE	0.166667	0.339759	2.03855	0.668499	0.858444	-1	50	31	31	0	WES_validated/WGS_validated
chr21	34799325	CAG	C	RUNX1	tumor_suppressor_gene	NM_001754.4	S314fs	frameshift	107	55	168	4	308	177	b351345a-18c2-42ed-8911-c37267c9cb58	LAML	0.87	FALSE	0.339506	0.364948	1.07494	0.571881	0.793936	-1	-1	-1	-1	-1	WES_validated/WGS_unavailable
chr21	34799343	C	CT	RUNX1	tumor_suppressor_gene	NM_001754.4	G309fs	frameshift	178	12	211	8	169	41	21bd7197-2504-4710-8c13-a9da9f71b0d5	LAML	0.68	TRUE	0.0631579	0.195238	3.09127	9.74e-05	0.000702872	-1	-1	-1	-1	-1	WES_validated/WGS_unavailable
chr21	34799346	T	TG	RUNX1	tumor_suppressor_gene	NM_001754.4	S308fs	frameshift	229	1	226	0	286	7	1e68e760-a4cf-4100-bf9c-e50fa8d126f6	BRCA	0.67	FALSE	0.00434783	0.0238908	5.49488	0.0841494	0.214052	-1	98	1	39	0	WES_validated/WGS_validated
chr21	34799412	G	GAT	RUNX1	tumor_suppressor_gene	NM_001754.4	Q286fs	frameshift	324	16	47	0	119	20	58c1c391-5ea3-4432-bb1e-e7e1974954bc	PAAD	0.42	TRUE	0.0470588	0.143885	3.05755	0.000839137	0.00448987	-1	102	6	42	0	WES_validated/WGS_validated
chr21	34834537	ACTGAG	A	RUNX1	tumor_suppressor_gene	NM_001754.4	L225_S226fs	frameshift	25	2	41	0	248	78	1d38d356-d126-4476-94d0-26616b9375b1	BRCA	0.46	FALSE	0.0740741	0.239264	3.23006	0.0550767	0.155855	-1	80	9	44	0	WES_validated/WGS_validated
chr21	34880692	GA	G	RUNX1	tumor_suppressor_gene	NM_001754.4	V124fs	frameshift	200	149	252	4	81	46	417dea5f-f68e-4dab-940e-43ae8c67e5e6	BRCA	0.6	FALSE	0.426934	0.362205	0.848386	0.208418	0.406432	-1	-1	-1	-1	-1	WES_validated/WGS_unavailable
chr21	34880697	T	TC	RUNX1	tumor_suppressor_gene	NM_001754.4	D123fs	frameshift	119	15	159	0	124	11	96b9c7db-1be1-4b60-b47c-26b654c3d64c	BRCA	0.31	FALSE	0.11194	0.0814815	0.727901	0.417583	0.653395	-1	-1	-1	-1	-1	WES_validated/WGS_unavailable
chr21	34886856	GGCAGGGTCTTGTT	G	RUNX1	tumor_suppressor_gene	NM_001754.4	N109_P113fs	frameshift	31	1	41	0	128	41	da9c10ea-c13f-4d88-8b94-a0cbc106d036	BRCA	0.33	FALSE	0.03125	0.242604	7.76331	0.00420405	0.0182045	-1	97	17	33	0	WES_validated/WGS_validated
chr21	43093189	GCCA	G	U2AF1	oncogene	NM_006758.2	G223del	proteinDel	12	10	26	0	50	36	9f00847c-bd1f-4cd0-99f9-d51d638c0795	BLCA	0.79	FALSE	0.454545	0.418605	0.92093	0.81183	0.943588	0	31	29	27	0	WES_validated/WGS_validated
chr21	43094548	GCCT	G	U2AF1	oncogene	NM_006758.2	G167del	proteinDel	24	4	35	0	493	60	032096a6-1923-44b9-a1cb-181bed041c8e	LGG	0.78	FALSE	0.142857	0.108499	0.759494	0.535556	0.764728	0	44	6	28	0	WES_validated/WGS_validated
chr22	29604033	GCT	G	NF2	tumor_suppressor_gene	NM_000268.4	S12_S13fs	frameshift	6	5	14	0	5	13	cfc6f9ef-73b1-46af-b4c8-94fdd34f4584	KIRP	0.36	FALSE	0.454545	0.722222	1.58889	0.239867	0.450595	-1	-1	-1	-1	-1	WES_validated/WGS_unavailable
chr22	36300867	ATCT	A	MYH9	oncogene	NM_002473.6	K940del	proteinDel	96	3	96	0	737	30	de206681-3e27-4d4f-8669-aefb12b5b1e3	HNSC	0.51	FALSE	0.030303	0.0391134	1.29074	1	1	0	4	0	27	0	WES_validated/WGS_failed_with_probability_0.884187059
chr22	41164128	T	TG	EP300	tumor_suppressor_gene	NM_001429.4	?1268fs	frameshift	117	12	93	0	0	5	5c4aebeb-fb6f-4d66-b24a-89ef20de971e	BLCA	0.29	TRUE	0.0930233	1	10.75	1.85e-05	0.00017608	-1	92	16	34	0	WES_validated/WGS_validated
chr22	41177214	A	AT	EP300	tumor_suppressor_gene	NM_001429.4	M1835fs	frameshift	77	5	82	0	86	19	ffcf851d-7fa1-4b45-911a-a3fbd74c253a	HNSC	0.32	FALSE	0.0609756	0.180952	2.96762	0.0158539	0.0565515	-1	116	22	52	0	WES_validated/WGS_validated
chr22	41177968	AGCAGCGG	A	EP300	tumor_suppressor_gene	NM_001429.4	K2086_R2088fs	frameshift	95	7	139	0	126	76	70741b73-9683-42bd-87fc-6a021a70103b	HNSC	0.3	TRUE	0.0686275	0.376238	5.48232	1.8e-09	3.42e-08	-1	64	6	33	0	WES_validated/WGS_validated
chr22	50275727	CCAGTGCAGCGGCAAT	C	PLXNB2	oncogene	NM_012401.4	I1827_L1831del	proteinDel	20	5	24	0	399	211	ccd65bc8-82ef-453e-b4bc-a005cc2262d5	BLCA	0.64	FALSE	0.2	0.345902	1.72951	0.194808	0.387535	0	66	25	58	0	WES_validated/WGS_validated
chr22	50278137	TCAG	T	PLXNB2	oncogene	NM_012401.4	L1622del	proteinDel	16	2	45	0	464	6	001cef41-ff86-4d3f-a140-a647ac4b10a1	BRCA	0.66	FALSE	0.111111	0.012766	0.114894	0.0315715	0.0986343	0	-1	-1	-1	-1	WES_validated/WGS_unavailable
chr22	50278149	CGGT	C	PLXNB2	oncogene	NM_012401.4	T1618del	proteinDel	75	2	59	0	196	8	b56dad1e-2fd5-47d8-9cc7-a54be9a1bae2	LUAD	0.55	FALSE	0.025974	0.0392157	1.5098	0.732668	0.899813	0	-1	-1	-1	-1	WES_validated/WGS_unavailable
chr22	50281151	ATCT	A	PLXNB2	oncogene	NM_012401.4	K1233del	proteinDel	24	9	51	0	169	203	89e867de-d30e-4bfc-a453-0a76309dabd5	BRCA	0.28	FALSE	0.272727	0.545699	2.0009	0.00322673	0.0144427	0	64	16	38	0	WES_validated/WGS_validated
